# Supplementary material
Source: MDPI journal article supplement (https://www.mdpi.com/2813-0464/2/3/28)
Supplement: s1 [file s1]

## Supplementary Information: Tables and Figures

### Sequencing, fast and slow: profiling microbiomes in human samples with nanopore sequencing

Yunseol Park<sup>1,†</sup>, Jeesu Lee<sup>1,†</sup>, Hyunjin Shim<sup>1,2,\*</sup>

#### Author Information

---

##### Affiliations

<sup>1</sup>Center for Biosystems and Biotech Data Science, Ghent University Global Campus, Incheon 21985, South Korea

<sup>2</sup>Department of Biology, California State University, Fresno, 5241 N Maple Ave, Fresno, CA 93740, USA

<sup>†</sup>These authors contributed equally to this work.

\*Corresponding Author: Hyunjin Shim ([shim@mail.fresnostate.edu](mailto:shim@mail.fresnostate.edu))

**Figure S1.** Read Length Histogram Estimated Bases showing Estimated N50 per microbiome replicate.

**Date of measure: 20220303 - Saliva1 R1**

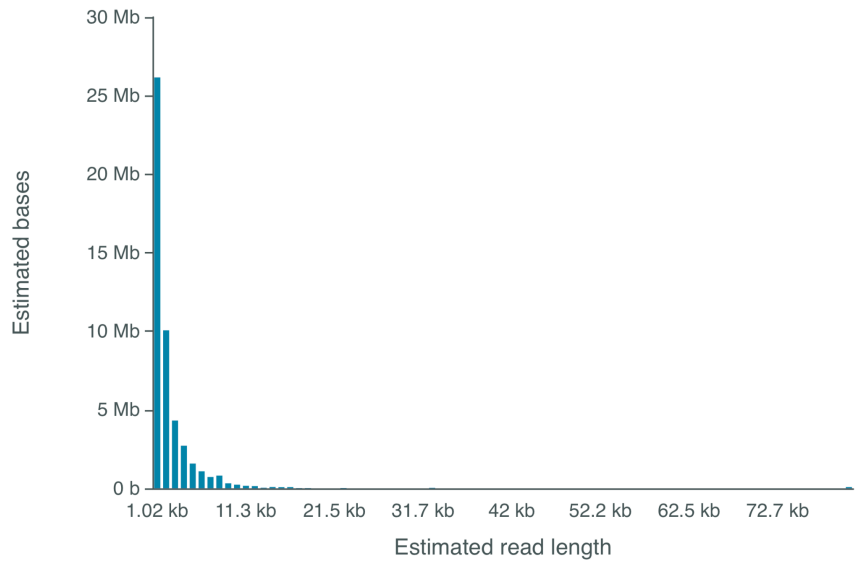

Date of measure: 20220307 - Saliva2 R1

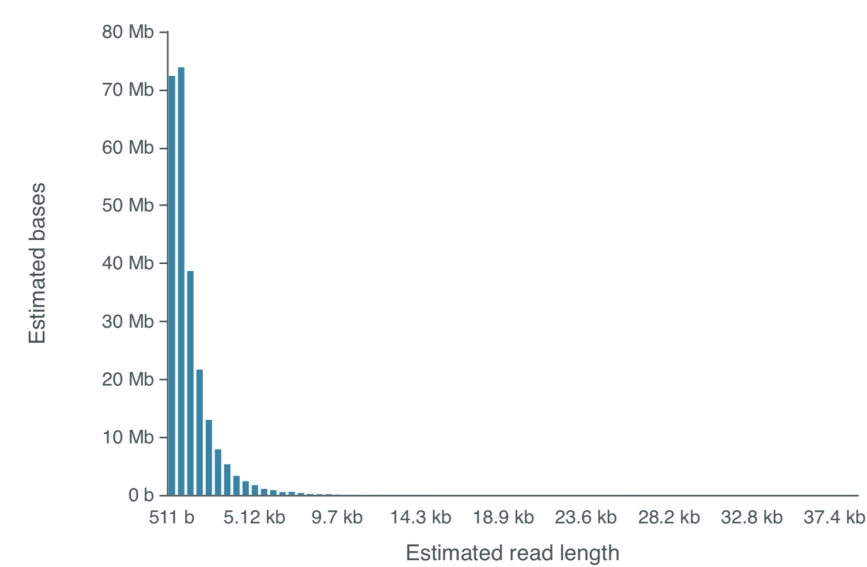

Date of measure: 20220307 - Saliva2 R2

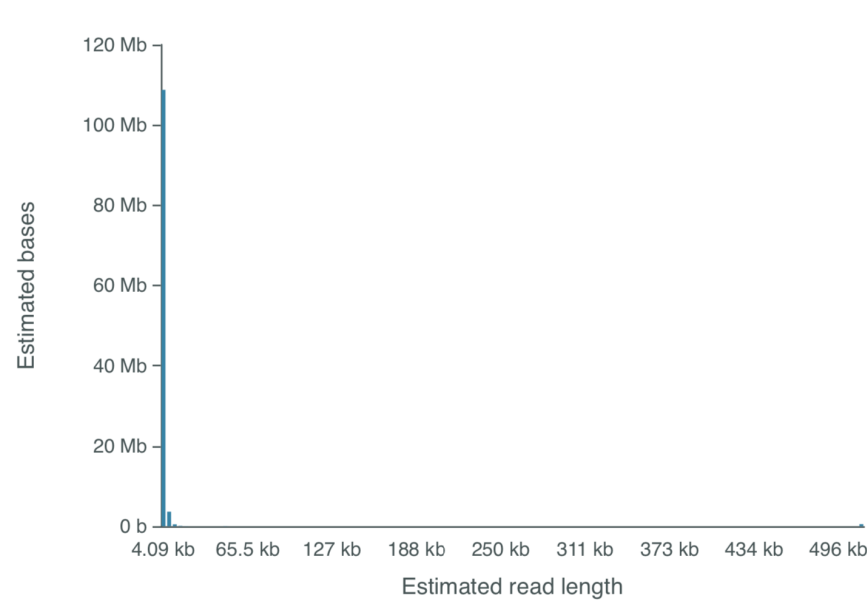

**Date of measure: 20220313 - Stool1 R1**

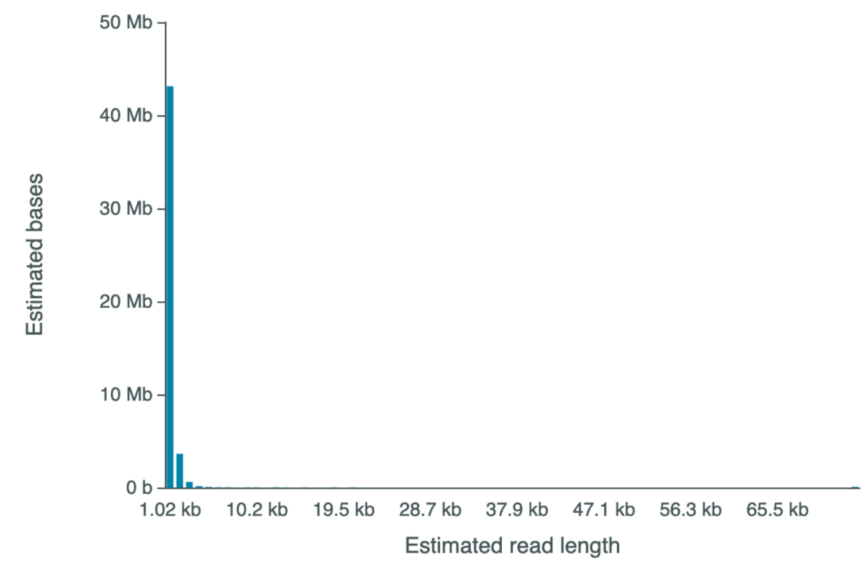

**Date of measure: 20220313 - Stool1 R2**

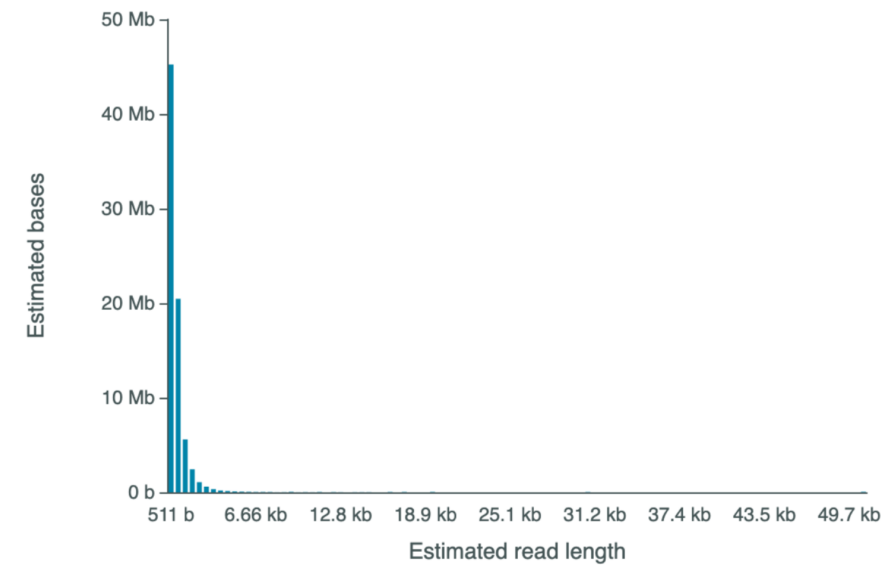

Date of measure: 20220321 - Saliva3 R1

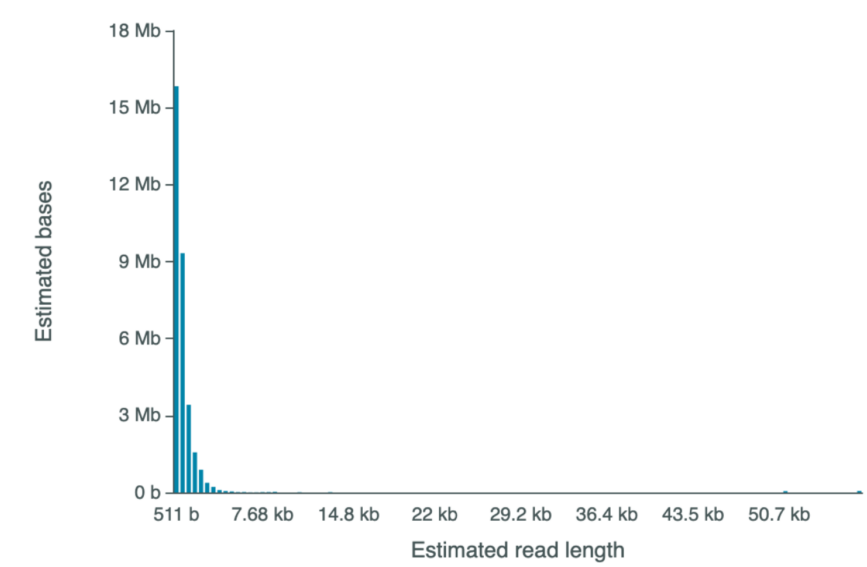

Date of measure: 20220321 - Saliva3 R2

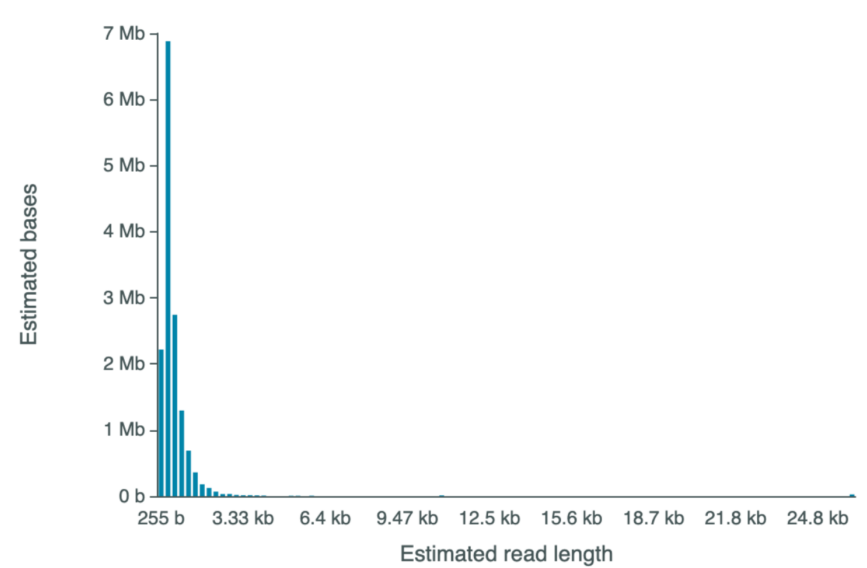

Date of measure: 20220701 - Stool2 R1

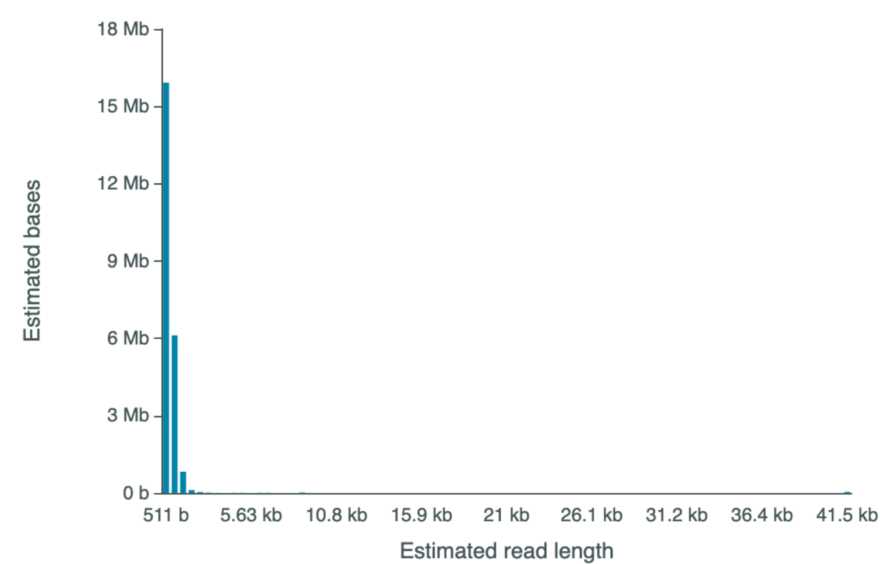

Date of measure: 20220701 - Stool2 R2

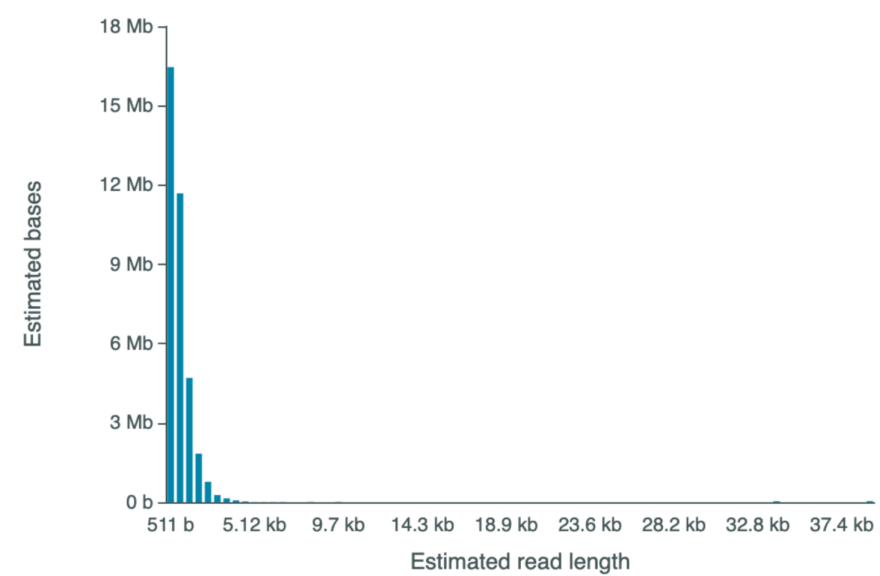

**Figure S2.** Cumulative Output Bases per microbiome replicate.

**Date of measure: 20220303 - Saliva1 R1**

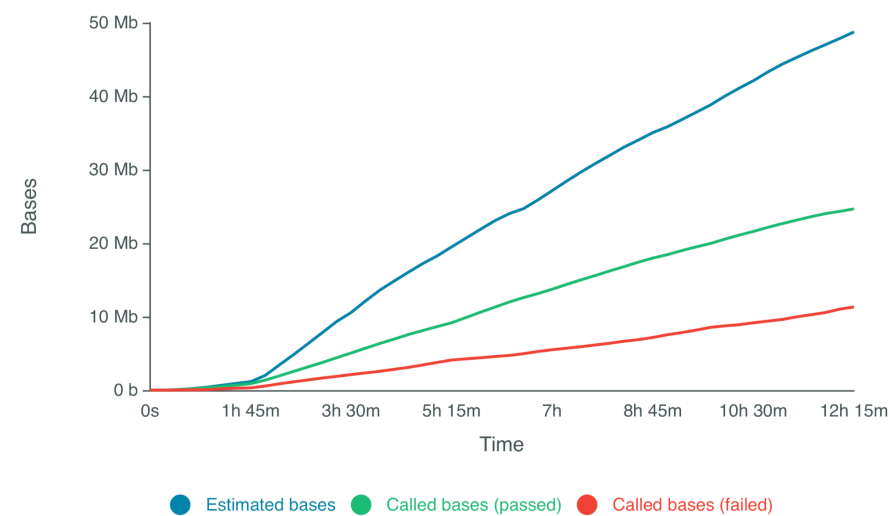

**Date of measure: 20220303 - Saliva1 R2**

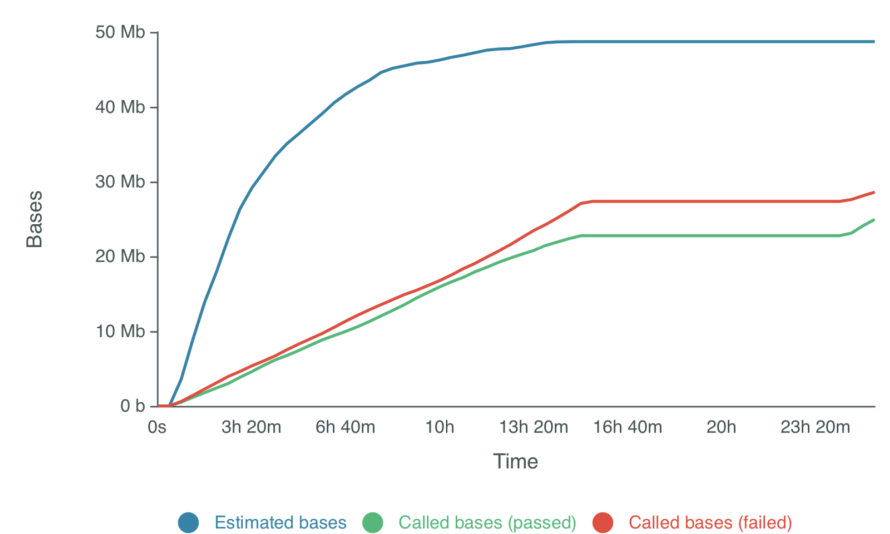

Date of measure: 20220307 - Saliva2 R1

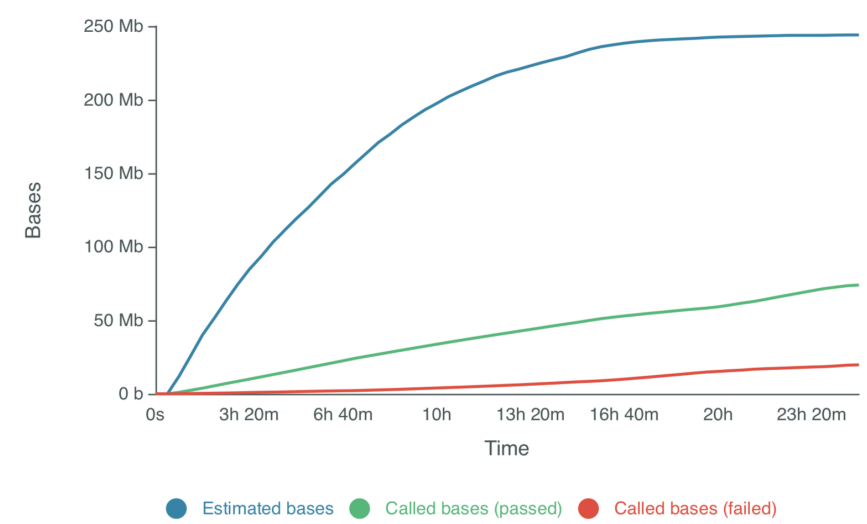

Date of measure: 20220307 - Saliva2 R2

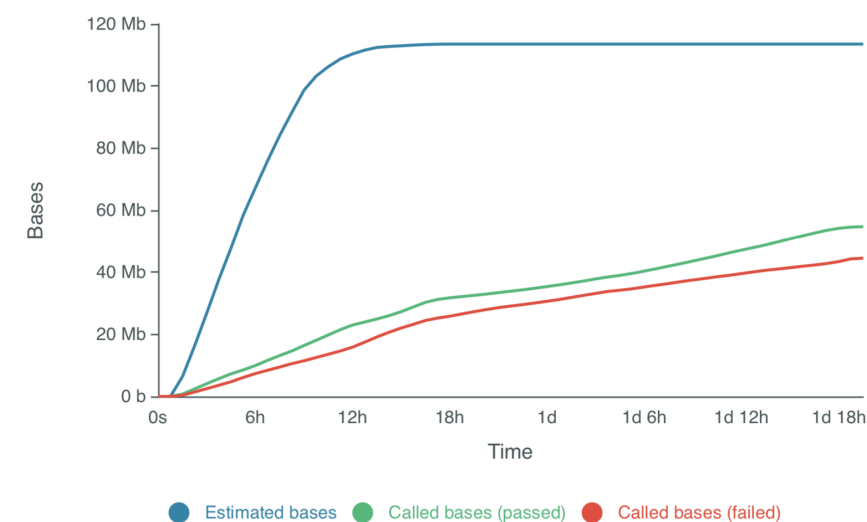



Date of measure: 20220313 - Stool1 R1

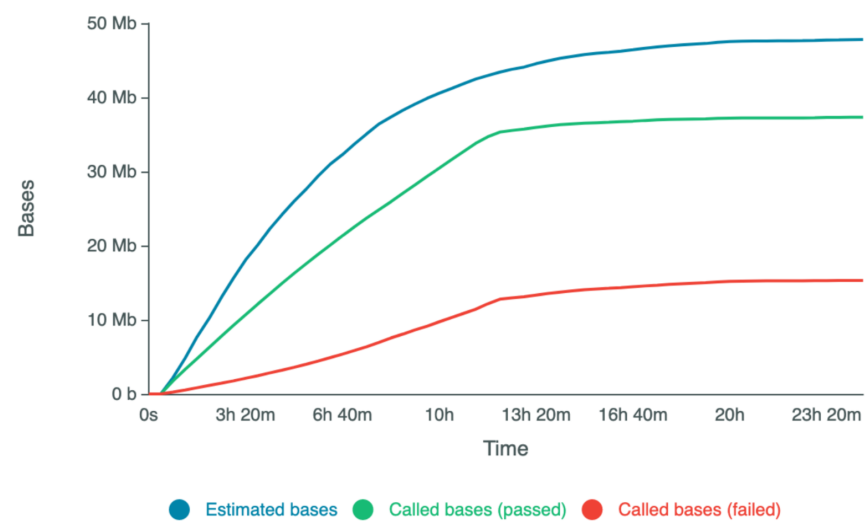

Date of measure: 20220313 - Stool1 R2

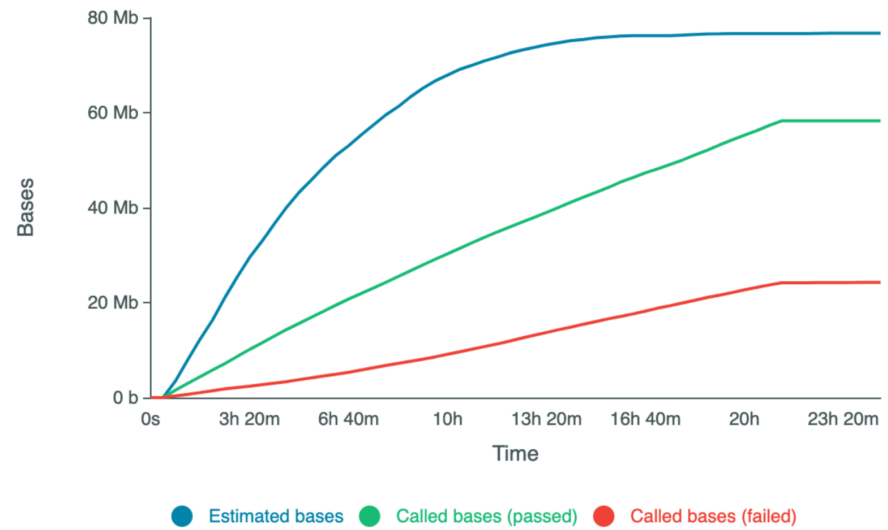

Date of measure: 20220321 - Saliva3 R1

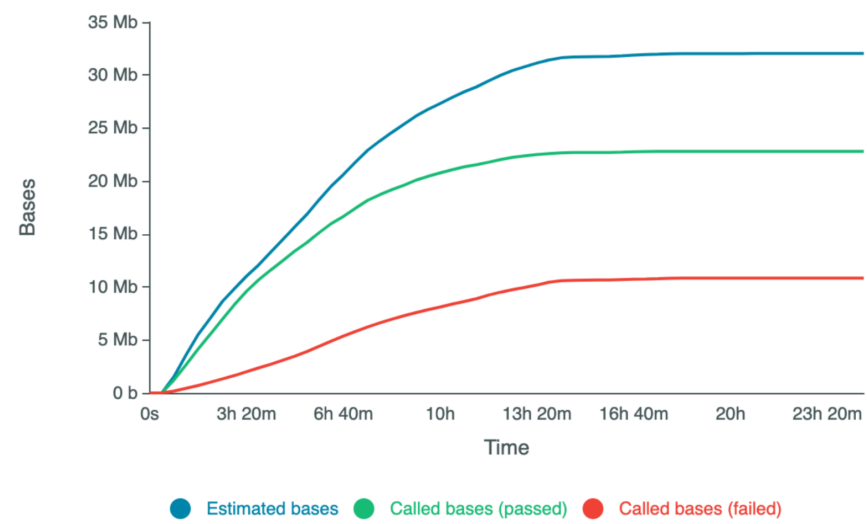

Date of measure: 20220321 - Saliva3 R2

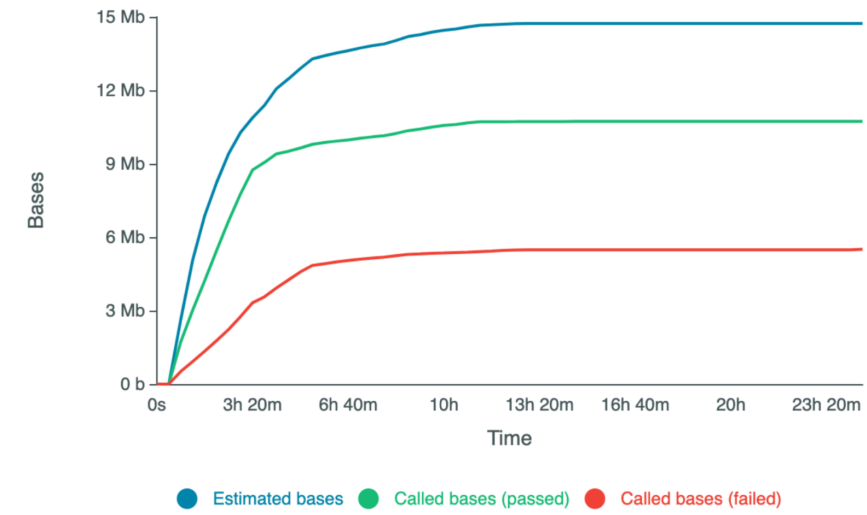

Date of measure: 20220701 - Stool2 R1

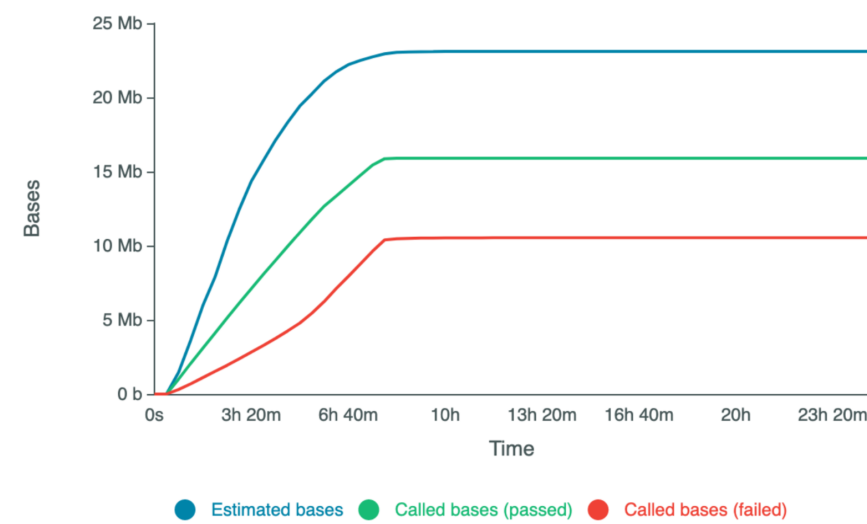

Date of measure: 20220701 - Stool2 R2

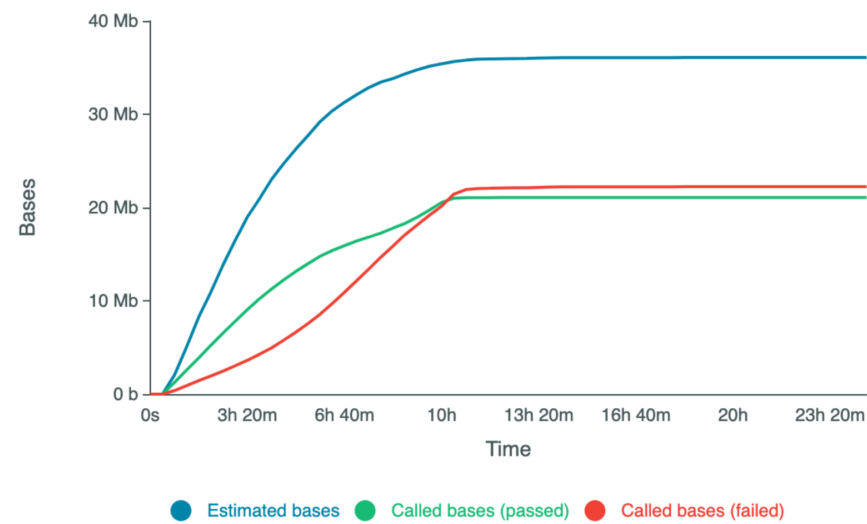

**Figure S3.** The taxonomy tree showing Top 20 taxa generated by the WIMP data analysis platform from the Centrifuge results, with a score to each taxonomic placement.

**Date of measure: 20220303 - Saliva1 R1**

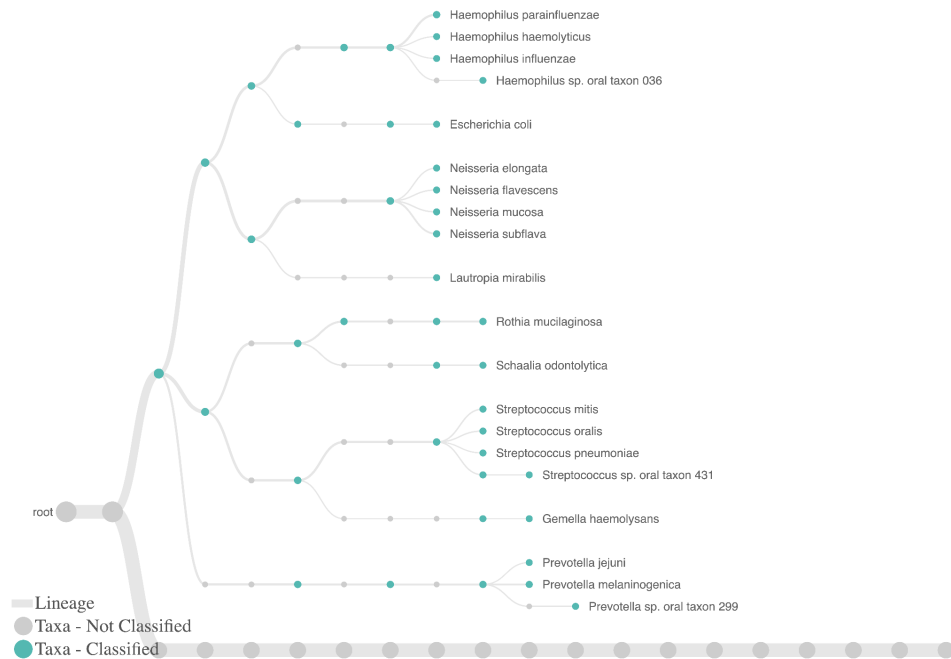

**Date of measure: 20220303 - Saliva1 R2**

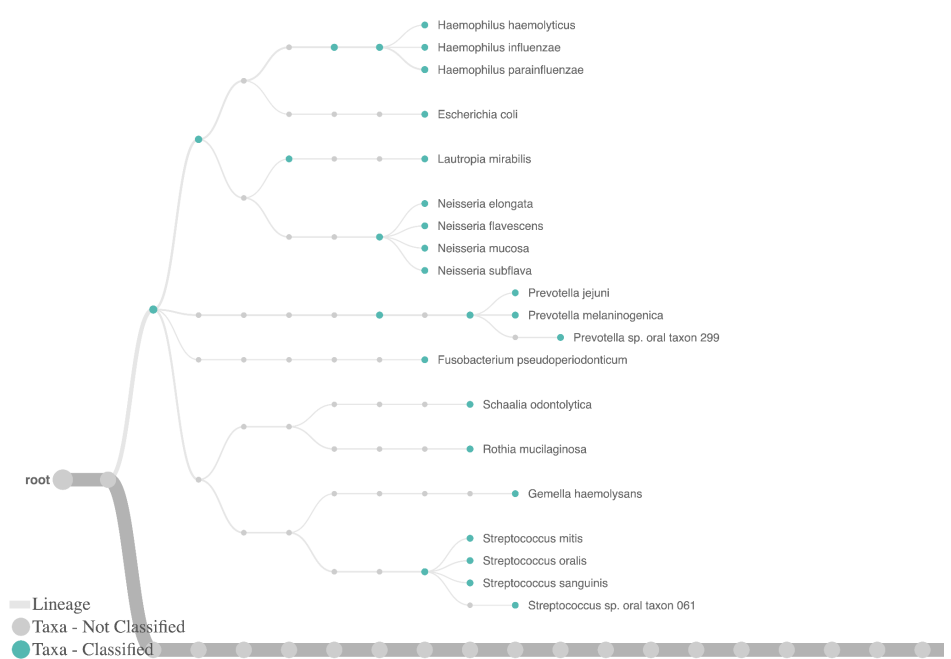

Date of measure: 20220307 - Saliva2 R1

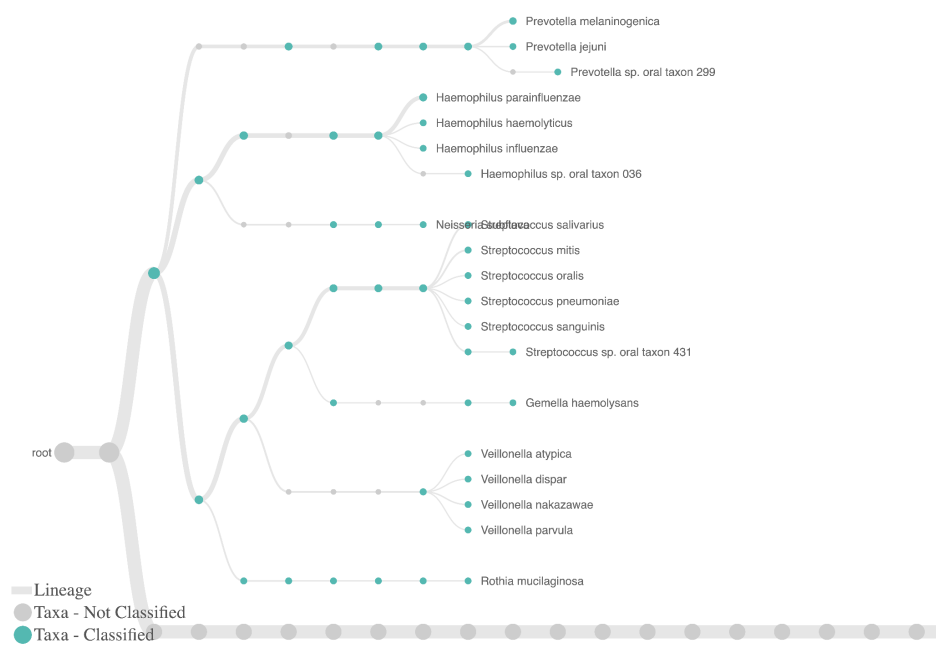

Date of measure: 20220307 - Saliva2 R2

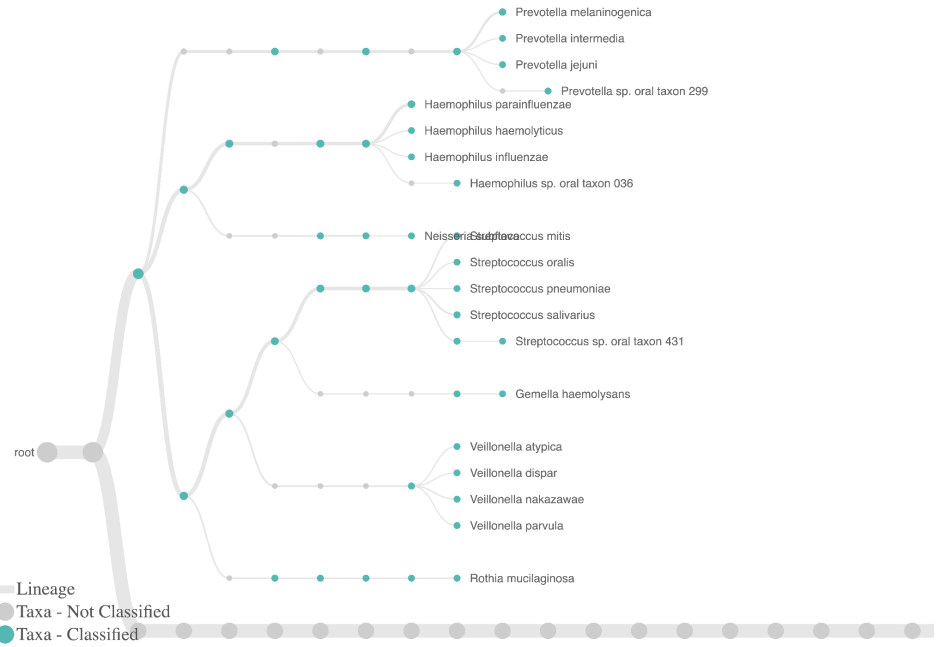

Date of measure: 20220313 - Stool1 R1

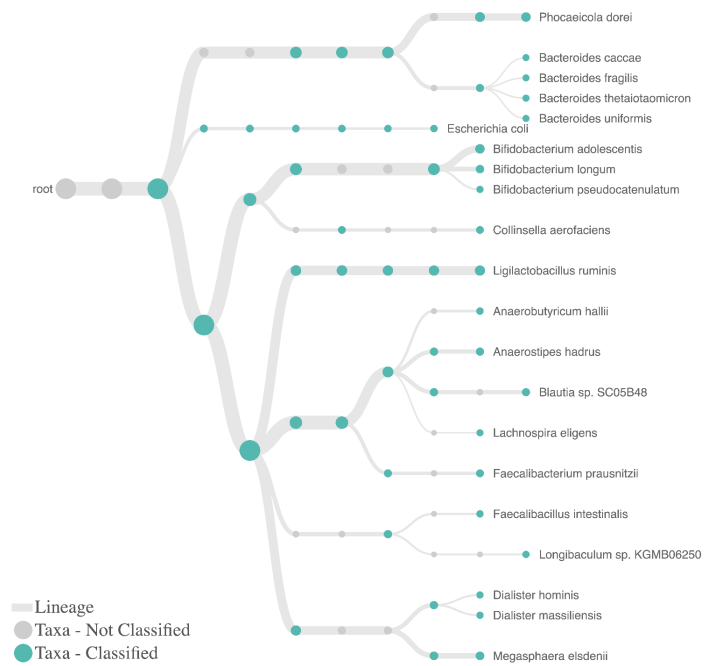

Date of measure: 20220313 - Stool1 R2

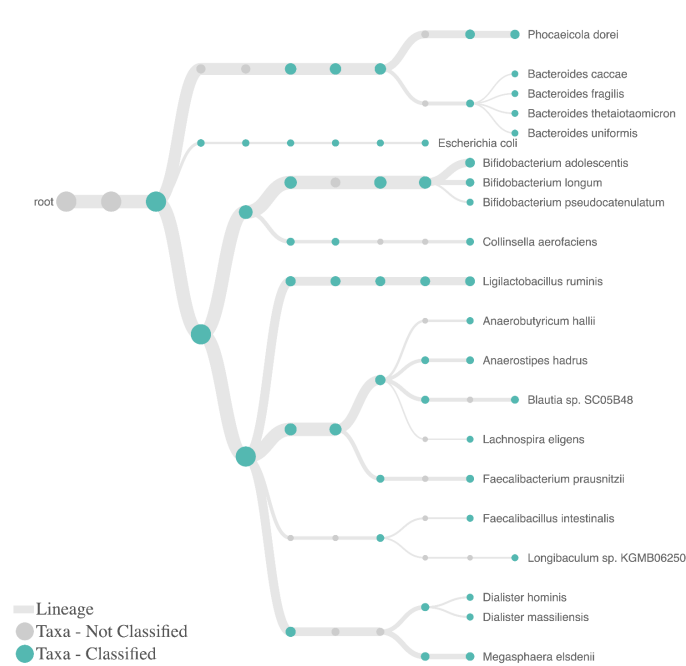

Date of measure: 20220321 - Saliva3 R1

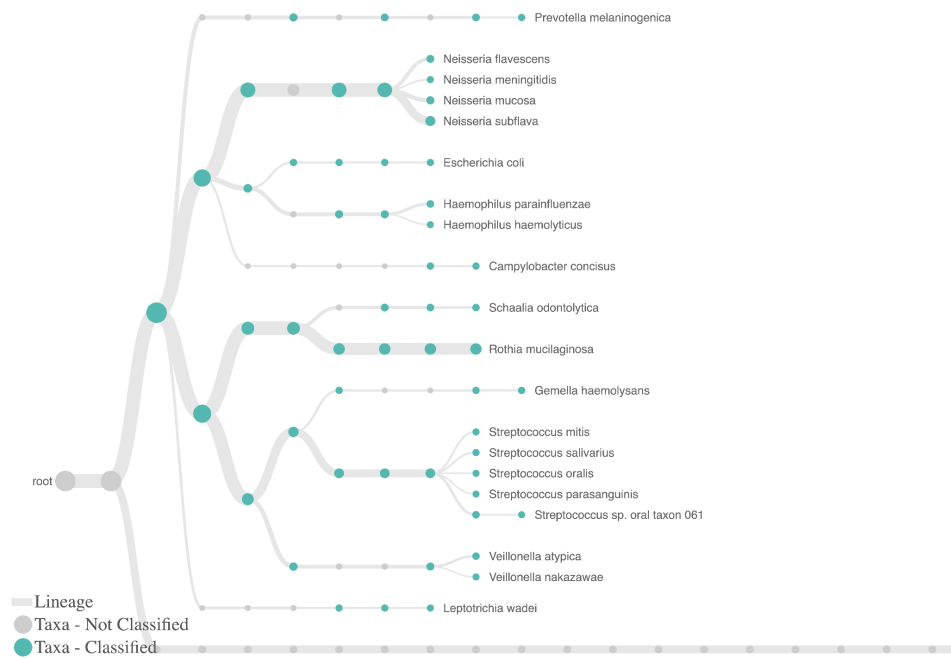

Date of measure: 20220321 - Saliva3 R2

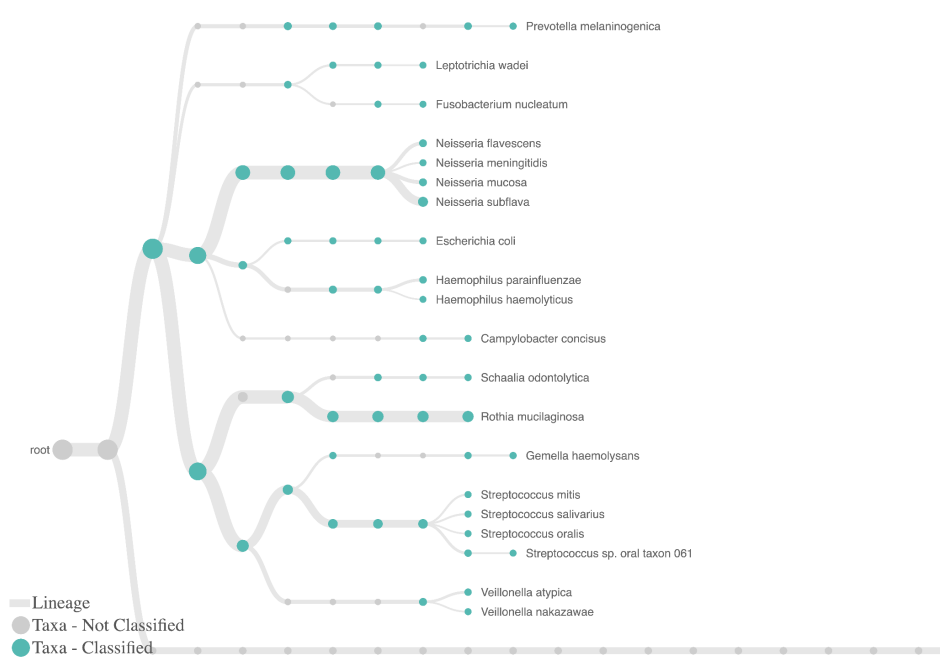

**Date of measure: 20220701 - Stool2 R1**

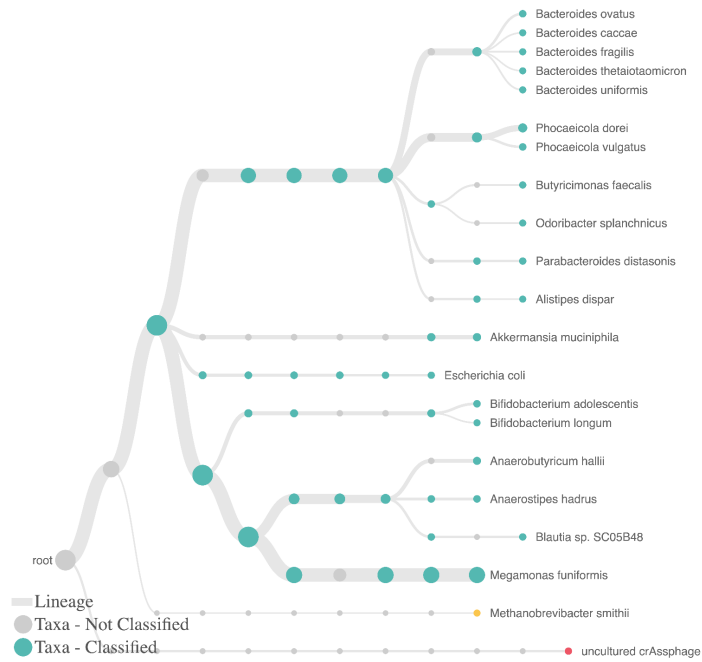

**Date of measure: 20220701 - Stool2 R2**

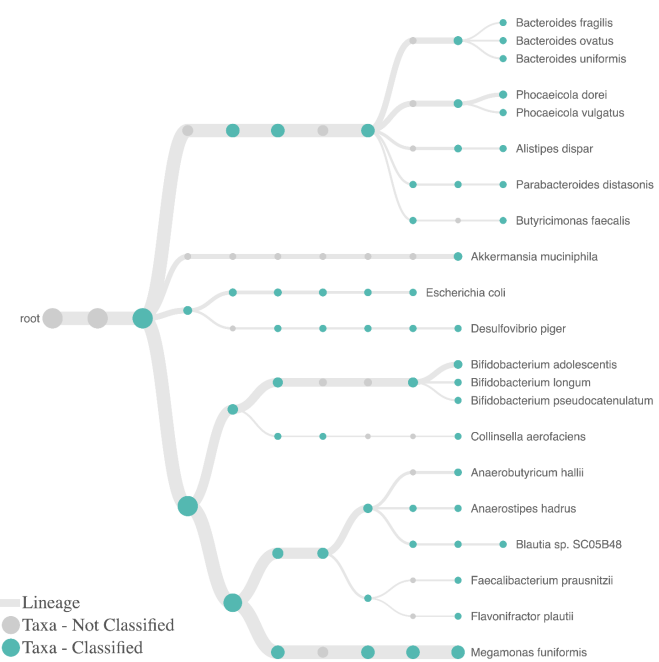





**Figure S5.** The Comprehensive Antibiotic Resistance Database (CARD) model conferring resistance to antibiotics in each microbiome replicate.

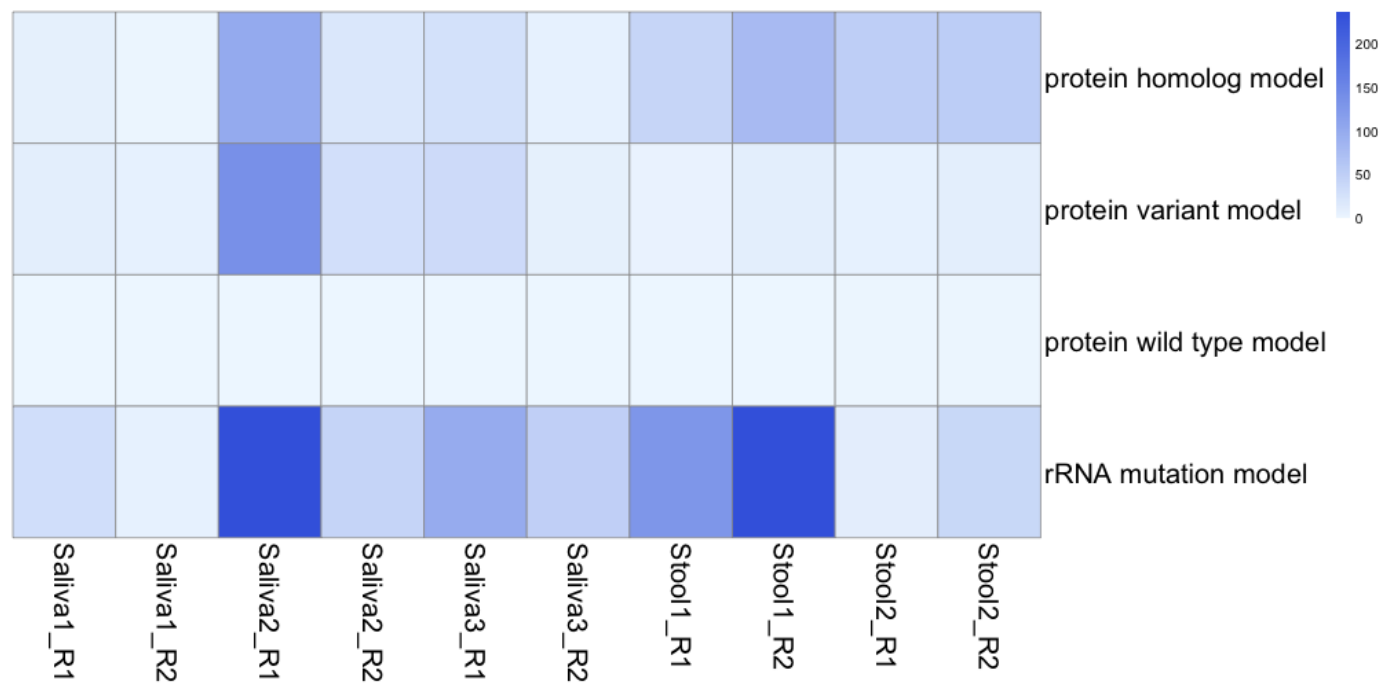

**Figure S6.** Phylum predicted by BERTax of unclassified reads belonging to (a) archaea, (b) bacteria, (c) eukaryota, and (d) virus.

**a.**

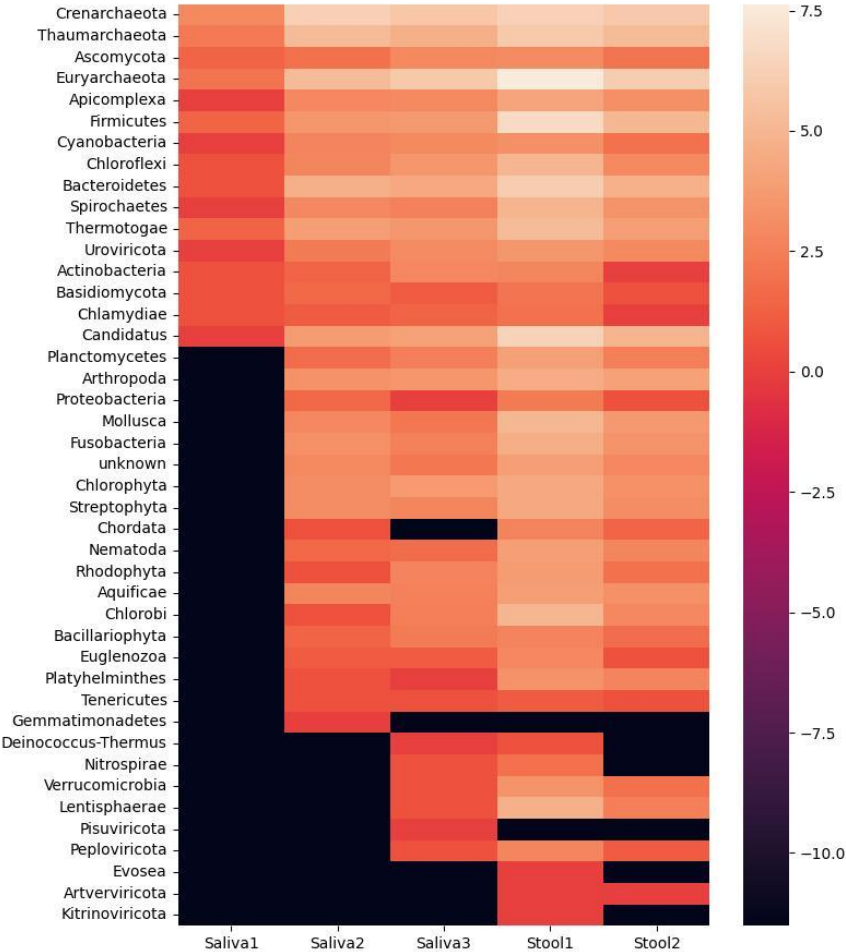

**b.**

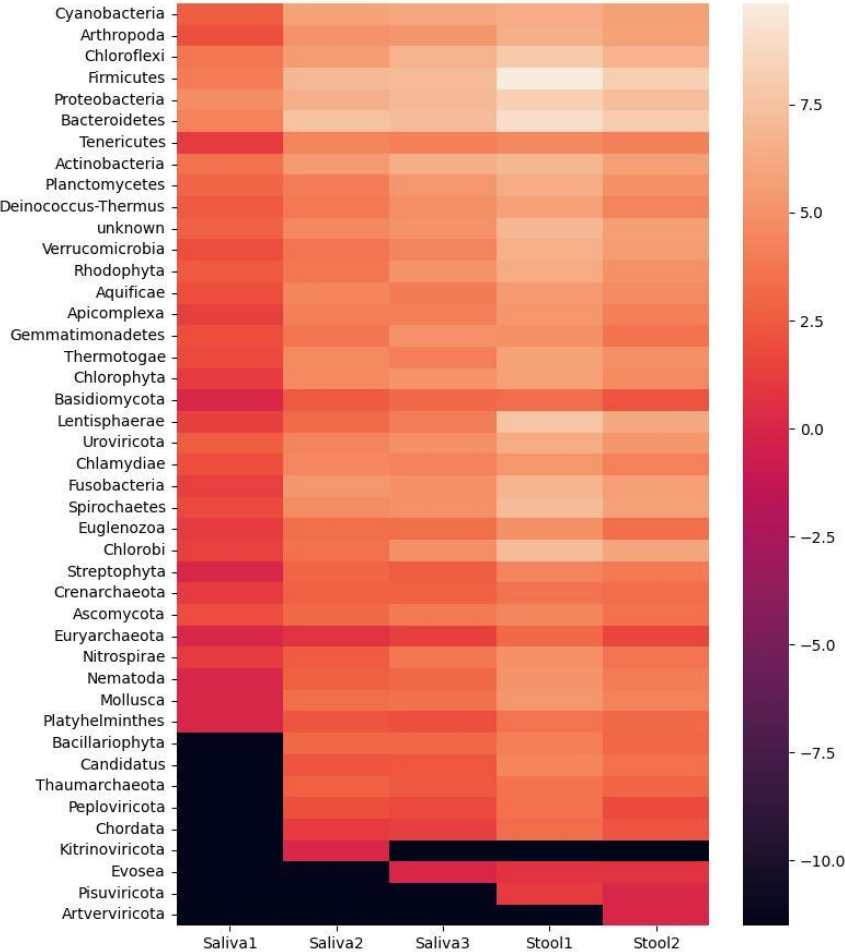

c.

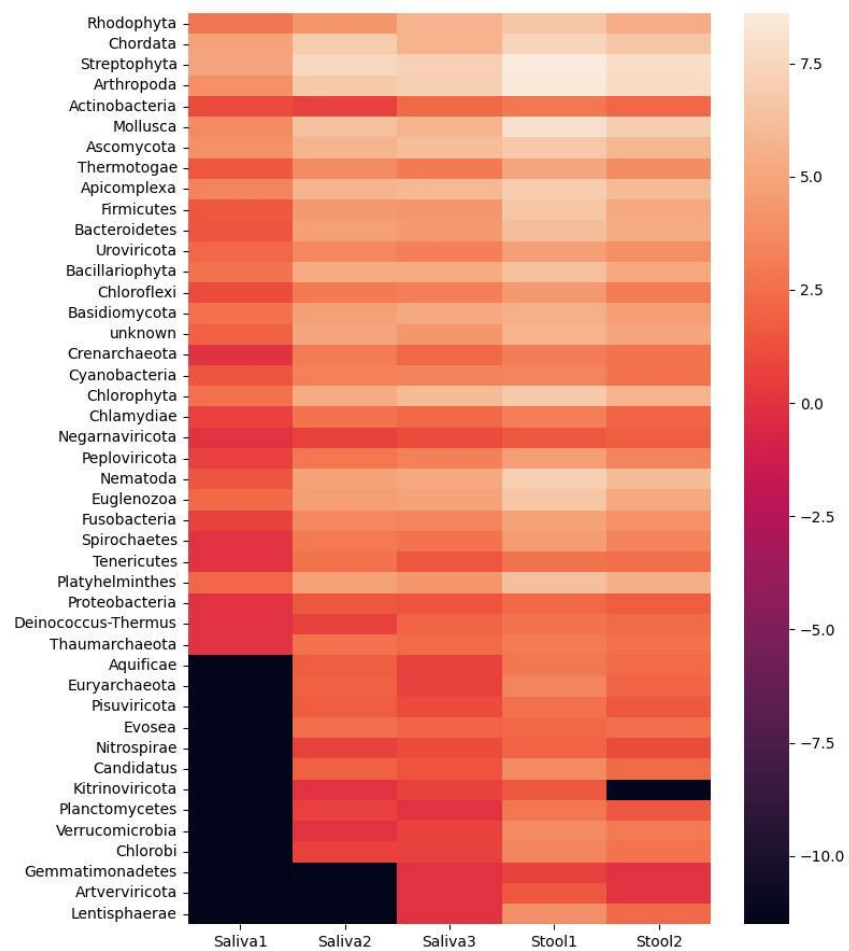

d.

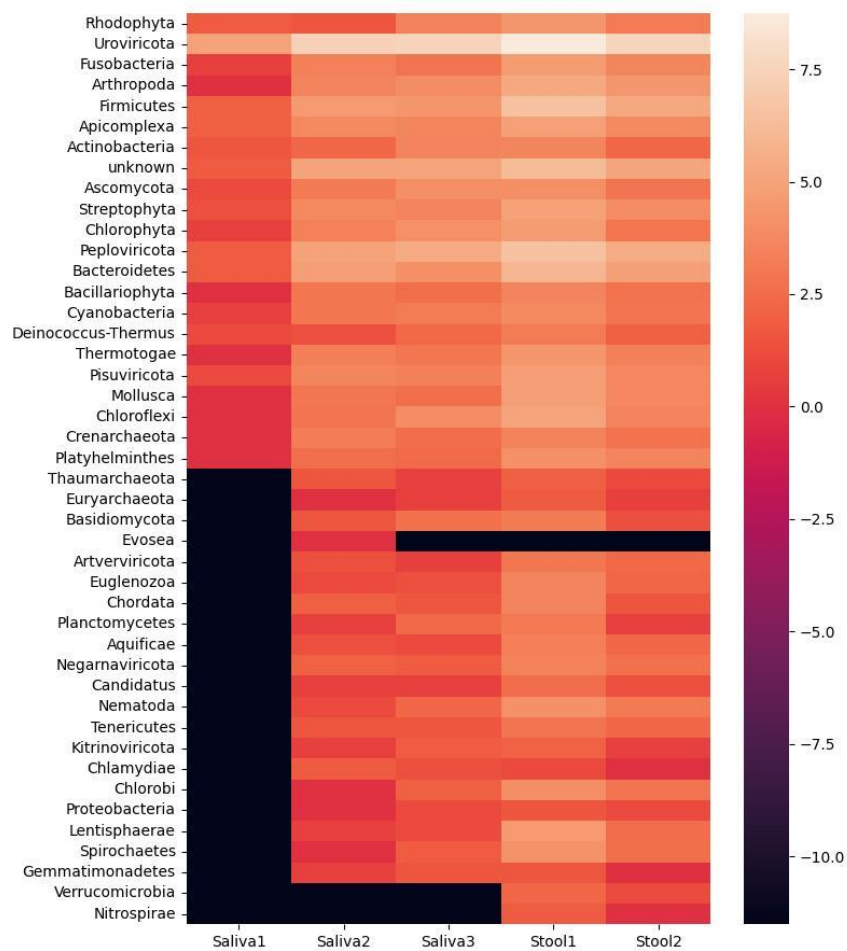

Figure S7. Genus predicted by BERTax of unclassified reads in Saliva1 belonging to (a) Archaea, (b) Bacteria, and (c) Eukaryota.

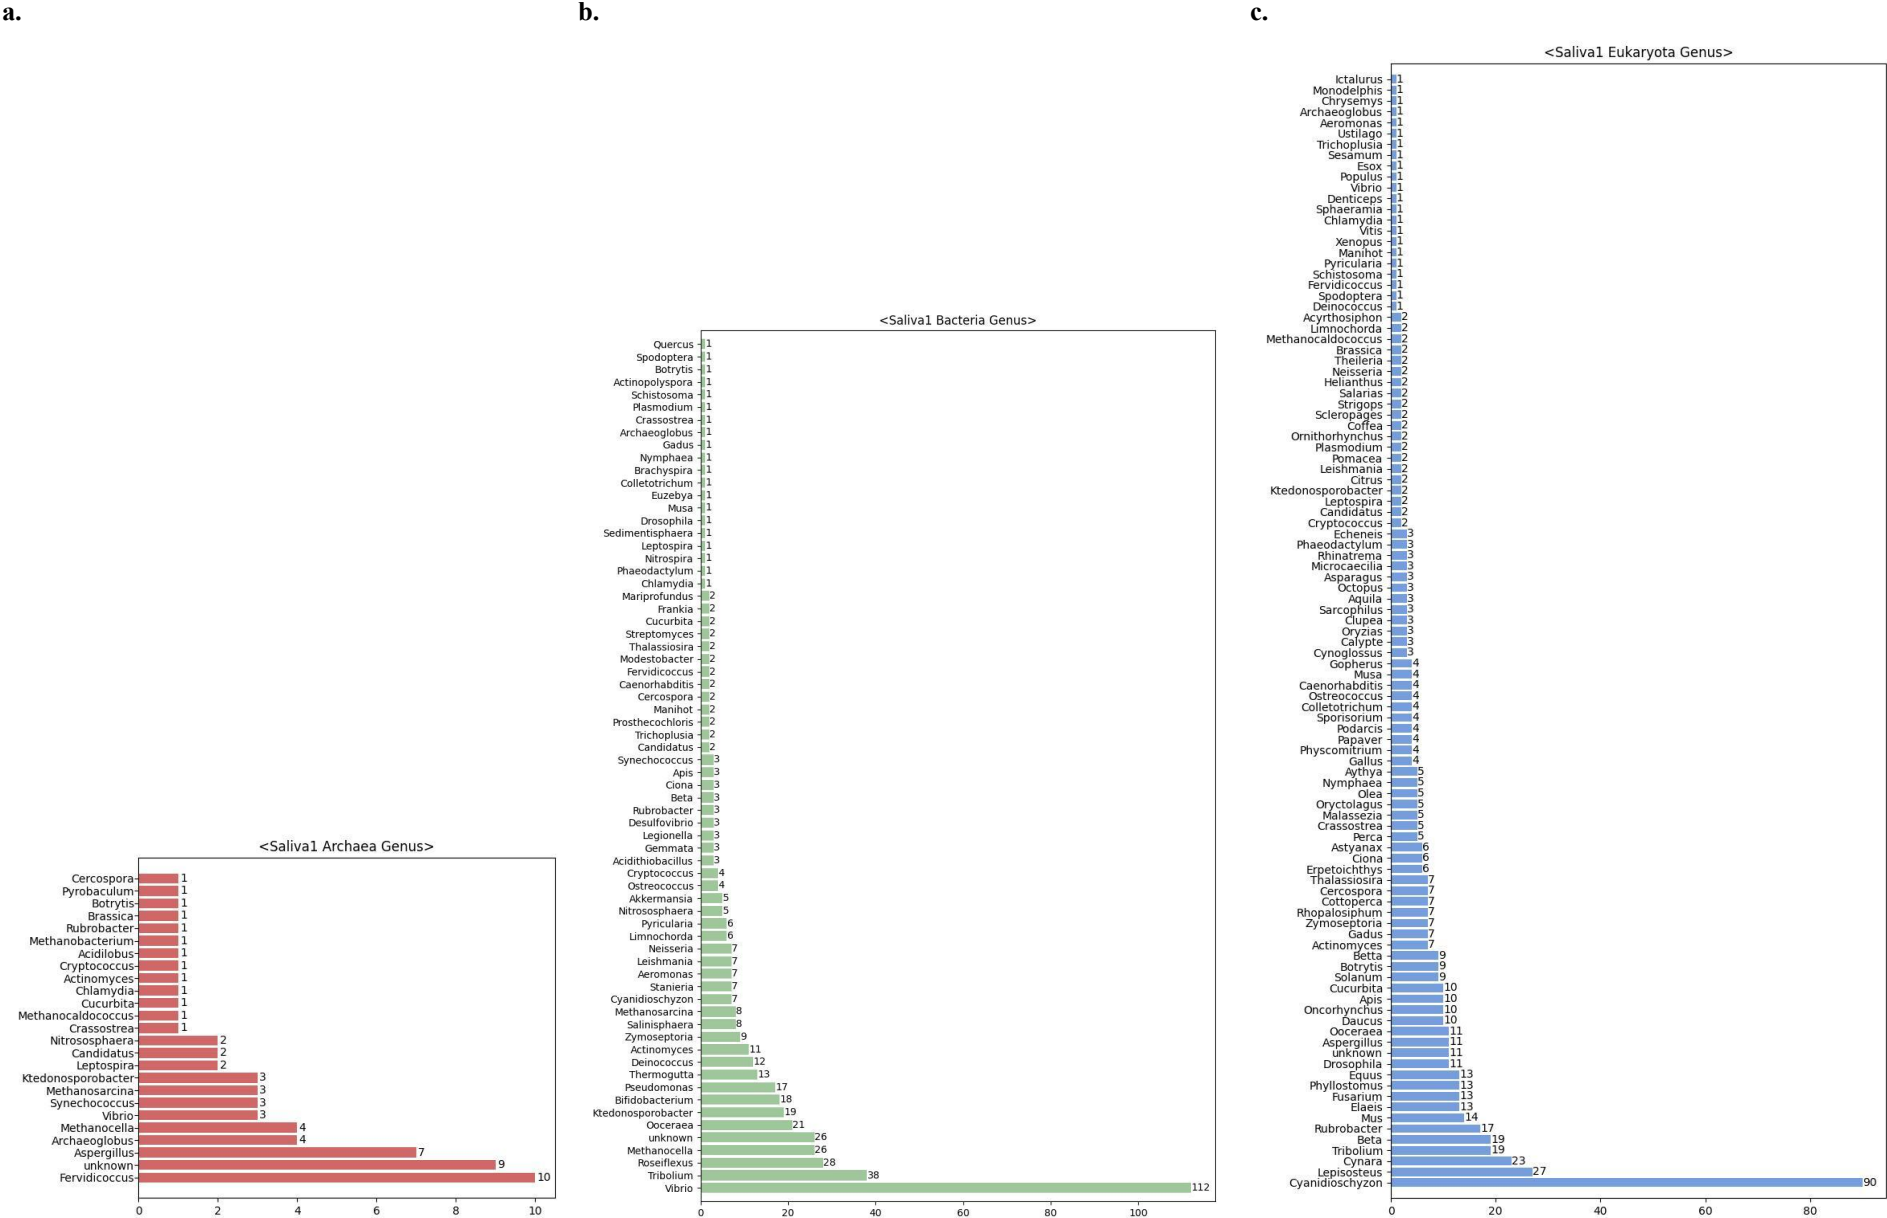

a.

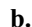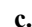



**Figure S9.** Genus predicted by BERTax of unclassified reads in Saliva3 belonging to (a) Archaea, (b) Bacteria, and (c) Eukaryota.

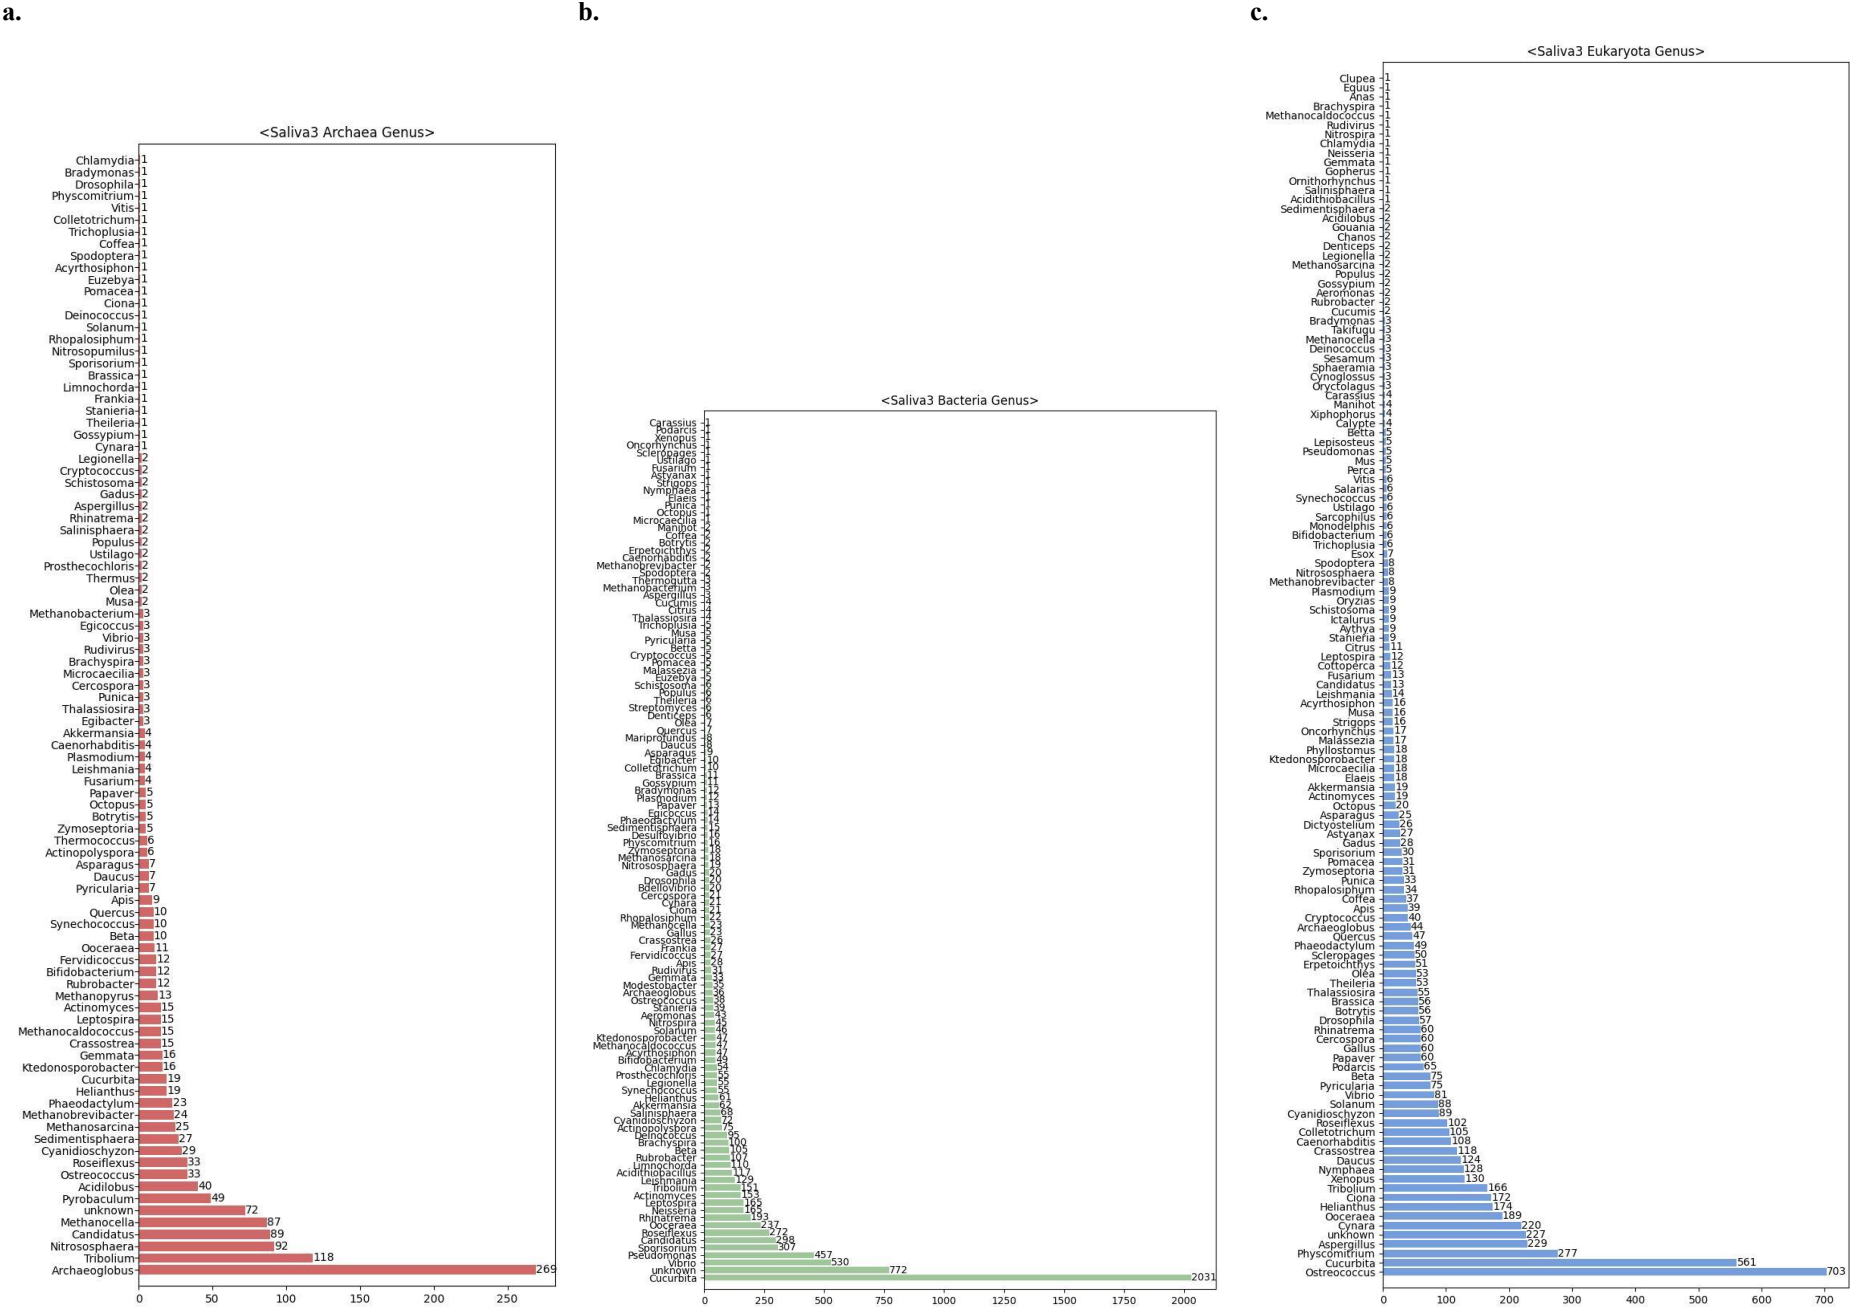

**a.**

c.



**a.**

**c.**

**Figure S12.** Virus host genus predicted by BERTax of unclassified reads in (a) Saliva1, (b) Saliva2, (c) Saliva3, (d) Stool1, and (e) Stool2.

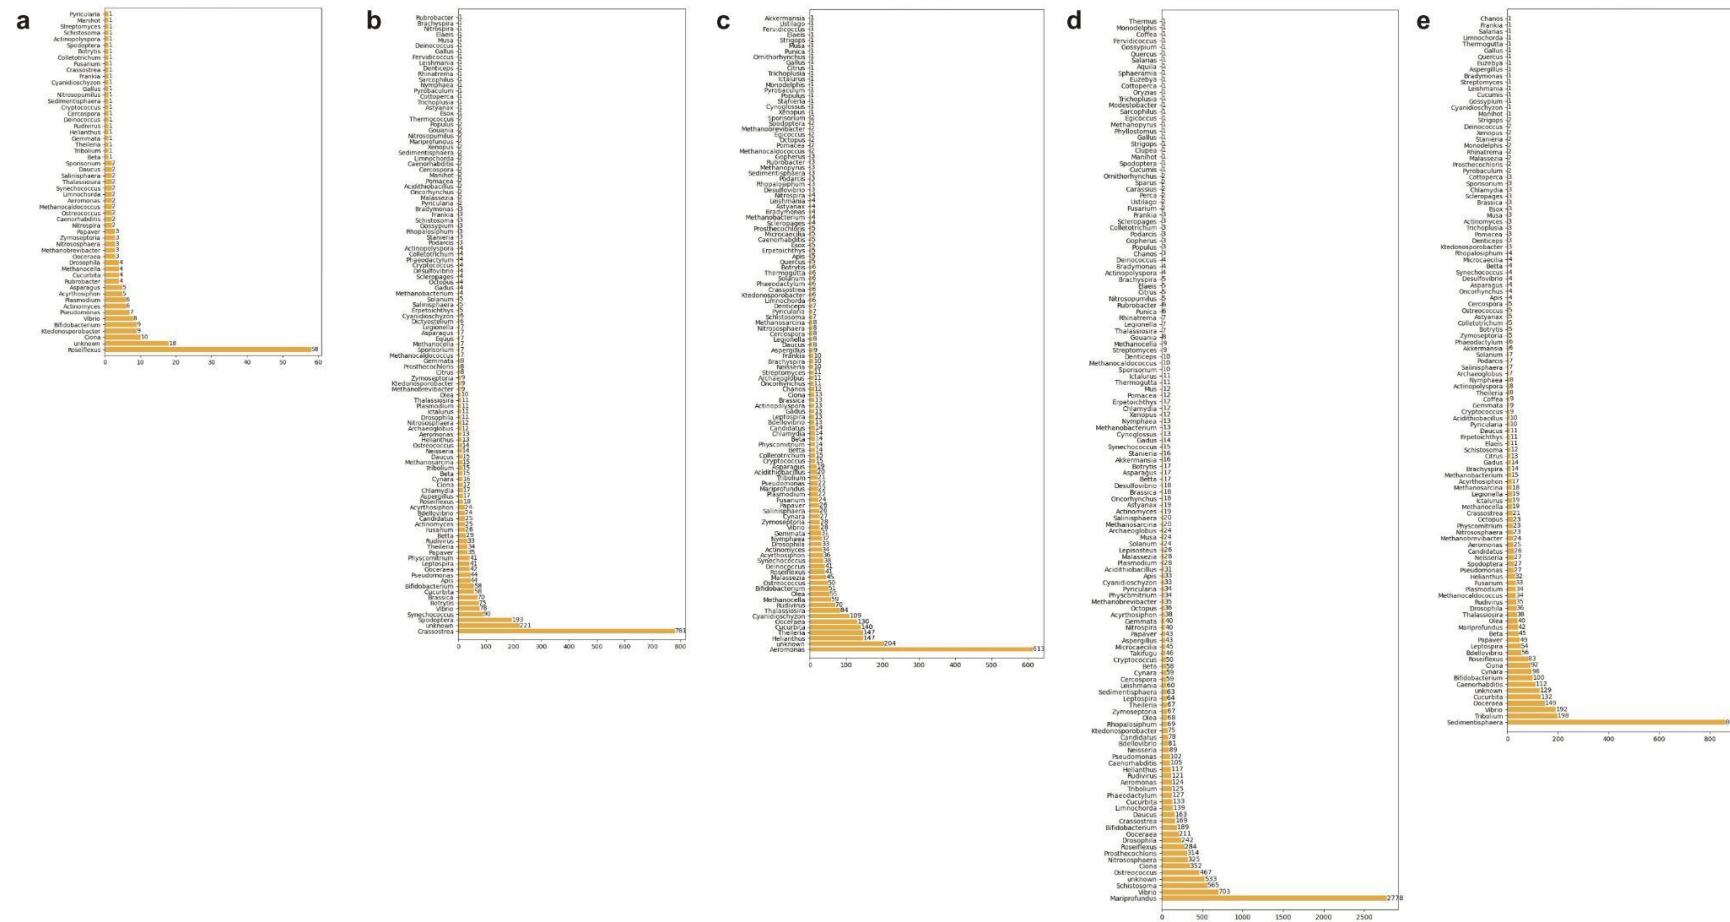

**Table S1.** Nanodrop results on DNA quantity and quality extracted from the human samples.

| Sample_Replicate | DNA concentration<br>(ng/μl) | A260<br>(10 mm path) | A280<br>(10 mm path) | 260/280 | 260/230 |
|------------------|------------------------------|----------------------|----------------------|---------|---------|
| Saliva1_R1       | 143.8                        | 2.877                | 1.261                | 2.28    | 3.20    |
| Saliva1_R2       | 20.5                         | 0.409                | 0.125                | 3.29    | 0.72    |
| Saliva2_R1       | 60.4                         | 1.208                | 0.559                | 2.16    | 1.42    |
| Saliva2_R2       | 119.7                        | 2.395                | 1.264                | 1.89    | 2.20    |
| Saliva3_R1       | 42.5                         | 0.850                | 0.429                | 1.98    | 1.49    |
| Saliva3_R2       | 103.7                        | 2.074                | 1.011                | 2.05    | 1.90    |
| Stool1_R1        | 66.6                         | 1.332                | 0.641                | 2.08    | 1.59    |
| Stool1_R2        | 102.6                        | 2.053                | 1.020                | 2.01    | 1.28    |
| Stool2_R1        | 101.5                        | 2.030                | 1.132                | 1.79    | 0.96    |
| Stool2_R2        | 95.2                         | 1.904                | 1.010                | 1.88    | 0.93    |
| Nasal1_R1        | 0.2                          | 0.004                | -0.012               | -0.36   | 0.03    |
| Nasal1_R2        | 1.0                          | 0.020                | 0.002                | 9.41    | 0.04    |
| Urine1_R1        | 1.1                          | 0.023                | -0.005               | -4.44   | 0.13    |
| Urine1_R2        | 1.3                          | 0.026                | 0.004                | 7.30    | 0.17    |
| Vaginal1_R1      | 0.0                          | 0.000                | 0.017                | -0.02   | 0.00    |
| Vaginal1_R2      | -0.8                         | -0.017               | -0.007               | 2.56    | -0.05   |

**Table S2.** Nanopore raw output summary per microbiome replicate (run length > 12 hours; Read filtering min\_qscore = 9).

| Sample_Replicate | Passed Bases | Failed Bases | Total Bases | Reads Generated | Estimated N50<br>(Estimated Bases) |
|------------------|--------------|--------------|-------------|-----------------|------------------------------------|
| Saliva1_R1       | 24.69 Mb     | 11.36 Mb     | 36.05 Mb    | 66.54 k         | 925 b                              |
| Saliva1_R2       | 24.95 Mb     | 28.59 Mb     | 53.54 Mb    | 59.12 k         | 1,090 b                            |
| Saliva2_R1       | 73.93 Mb     | 19.68 Mb     | 93.61 Mb    | 381.96 k        | 816 b                              |
| Saliva2_R2       | 54.72 Mb     | 44.52 Mb     | 99.24 Mb    | 180.56 k        | 769 b                              |
| Saliva3_R1       | 22.80 Mb     | 10.84 Mb     | 33.64 Mb    | 68.37 k         | 518 b                              |
| Saliva3_R2       | 10.73 Mb     | 5.5 Mb       | 16.23 Mb    | 36.6 k          | 412 b                              |
| Stool1_R1        | 37.33 Mb     | 15.31 Mb     | 52.64 Mb    | 123.11 k        | 384 b                              |
| Stool1_R2        | 58.27 Mb     | 24.26 Mb     | 82.53 Mb    | 182.84 k        | 434 b                              |
| Stool2_R1        | 15.90 Mb     | 10.53 Mb     | 26.43 Mb    | 61.29 k         | 378 b                              |
| Stool2_R2        | 21.07 Mb     | 22.23 Mb     | 43.30 Mb    | 74.28 k         | 558 b                              |

**Table S3.** Classification of each nanopore read to the microbe species or strain.  
(refer to CSV files)

**Table S4.** Ten most abundant species in each microbiome replicate, with the host-microbe interaction type assessment as beneficial, harmful, or commensal.

| Saliva1_R1: Beneficial Bacteria                  |       |             |              |               |               |             |              |               |               |
|--------------------------------------------------|-------|-------------|--------------|---------------|---------------|-------------|--------------|---------------|---------------|
|                                                  | reads | seqlen_mean | seqlen_stdev | seqlen_pstdev | seqlen_median | qscore_mean | qscore_stdev | qscore_pstdev | qscore_median |
| <i>Haemophilus parainfluenzae</i>                | 650   | 1462.15     | 1524.83      | 1523.65       | 857.50        | 10.67       | 1.38         | 1.37          | 10            |
| <i>Schaalia odontolytica</i>                     | 84    | 2068.08     | 2003.65      | 1991.69       | 1631.00       | 10.18       | 1.05         | 1.05          | 10            |
| <i>Gemella haemolysans</i>                       | 48    | 2161.42     | 2272.39      | 2248.60       | 1154.00       | 10.88       | 1.58         | 1.56          | 10.5          |
| <i>Haemophilus parainfluenzae T3T1</i>           | 40    | 1195.28     | 833.68       | 823.19        | 959.50        | 10.78       | 1.19         | 1.17          | 11            |
| <i>Actinomyces sp. oral taxon 169</i>            | 35    | 2203.29     | 2684.60      | 2645.97       | 1068.00       | 10.29       | 1.23         | 1.21          | 10            |
| <i>Streptococcus sanguinis</i>                   | 29    | 1609.66     | 1666.50      | 1637.51       | 837.00        | 10.97       | 1.66         | 1.63          | 11            |
| <i>Streptococcus salivarius</i>                  | 27    | 1610.89     | 1511.01      | 1482.77       | 898.00        | 10.56       | 1.40         | 1.37          | 10            |
| <i>Actinomyces naeslundii</i>                    | 19    | 2365.26     | 2523.48      | 2456.18       | 1617.00       | 10.37       | 1.01         | 0.98          | 10            |
| <i>Actinomyces oris</i>                          | 16    | 1693.94     | 1655.18      | 1602.62       | 956.00        | 10.31       | 1.20         | 1.16          | 10            |
| <i>Actinomyces sp. HMT 175</i>                   | 11    | 1589.27     | 1704.39      | 1625.08       | 1162.00       | 10.45       | 1.13         | 1.08          | 11            |
| Saliva1_R1: Commensal Bacteria                   |       |             |              |               |               |             |              |               |               |
|                                                  | reads | seqlen_mean | seqlen_stdev | seqlen_pstdev | seqlen_median | qscore_mean | qscore_stdev | qscore_pstdev | qscore_median |
| <i>Actinomyces sp. oral taxon 169</i>            | 35    | 2203.29     | 2684.60      | 2645.97       | 1068.00       | 10.29       | 1.23         | 1.21          | 10            |
| <i>Cardiobacterium hominis</i>                   | 25    | 1671.84     | 1449.06      | 1419.78       | 1054.00       | 10.16       | 1.14         | 1.12          | 10            |
| <i>Aggregatibacter aphrophilus</i>               | 24    | 1497.33     | 2085.09      | 2041.18       | 785.50        | 10.83       | 1.17         | 1.14          | 11            |
| <i>Capnocytophaga sputigena</i>                  | 19    | 1795.79     | 1654.65      | 1610.51       | 1042.00       | 10.00       | 1.11         | 1.08          | 10            |
| <i>Actinomyces oris</i>                          | 16    | 1693.94     | 1655.18      | 1602.62       | 956.00        | 10.31       | 1.20         | 1.16          | 10            |
| <i>Capnocytophaga gingivalis</i>                 | 13    | 1567.31     | 1277.39      | 1227.27       | 921.00        | 10.15       | 0.90         | 0.86          | 10            |
| <i>Actinomyces sp. HMT 175</i>                   | 11    | 1589.27     | 1704.39      | 1625.08       | 1162.00       | 10.45       | 1.13         | 1.08          | 11            |
| <i>Actinomyces sp. oral taxon 171 str. F0337</i> | 9     | 1606.78     | 1050.72      | 990.63        | 1216.00       | 10.44       | 0.73         | 0.68          | 10            |
| <i>Gemella sanguinis</i>                         | 9     | 2937.33     | 2717.33      | 2561.93       | 2262.00       | 10.56       | 1.81         | 1.71          | 10            |
| <i>Eikenella corrodens</i>                       | 7     | 3405.29     | 3672.37      | 3399.95       | 2337.00       | 10.14       | 1.46         | 1.36          | 9             |
| Saliva1_R1: Harmful Bacteria                     |       |             |              |               |               |             |              |               |               |
|                                                  | reads | seqlen_mean | seqlen_stdev | seqlen_pstdev | seqlen_median | qscore_mean | qscore_stdev | qscore_pstdev | qscore_median |
| <i>Neisseria subflava</i>                        | 435   | 2127.49     | 2083.72      | 2081.32       | 1478.00       | 10.46       | 1.19         | 1.19          | 10            |
| <i>Rothia mucilaginosa</i>                       | 402   | 1470.37     | 1648.10      | 1646.05       | 900.50        | 10.16       | 1.06         | 1.05          | 10            |
| <i>Prevotella melaninogenica</i>                 | 360   | 1194.75     | 1370.90      | 1369.00       | 739.00        | 10.55       | 1.31         | 1.31          | 10            |
| <i>Streptococcus mitis</i>                       | 181   | 2382.03     | 2388.87      | 2382.26       | 1643.00       | 10.57       | 1.26         | 1.25          | 11            |
| <i>Neisseria mucosa</i>                          | 177   | 2150.41     | 2016.20      | 2010.50       | 1461.00       | 10.44       | 1.17         | 1.16          | 10            |
| <i>Rothia mucilaginosa DY-18</i>                 | 143   | 1577.58     | 1451.70      | 1446.62       | 1021.00       | 10.24       | 1.05         | 1.05          | 10            |
| <i>Prevotella sp. oral taxon 299 str. F0039</i>  | 141   | 1141.89     | 1345.37      | 1340.59       | 689.00        | 10.70       | 1.36         | 1.35          | 10            |

|                             |     |         |         |         |         |       |      |      |    |
|-----------------------------|-----|---------|---------|---------|---------|-------|------|------|----|
| <i>Neisseria flavescens</i> | 132 | 1738.63 | 1783.62 | 1776.85 | 1149.50 | 10.40 | 1.23 | 1.22 | 10 |
| <i>Lautropia mirabilis</i>  | 125 | 1815.30 | 1719.66 | 1712.76 | 1326.00 | 10.31 | 0.98 | 0.98 | 10 |
| <i>Neisseria elongata</i>   | 87  | 2051.25 | 1772.53 | 1762.32 | 1287.00 | 10.37 | 1.14 | 1.14 | 10 |

| Saliva1_R2: Beneficial Bacteria                 |       |             |              |               |               |             |              |               |               |
|-------------------------------------------------|-------|-------------|--------------|---------------|---------------|-------------|--------------|---------------|---------------|
|                                                 | reads | seqlen_mean | seqlen_stdev | seqlen_pstdev | seqlen_median | qscore_mean | qscore_stdev | qscore_pstdev | qscore_median |
| <i>Haemophilus parainfluenzae</i>               | 276   | 2314.18     | 3157.86      | 3152.13       | 1051.00       | 9.96        | 1.01         | 1.01          | 10            |
| <i>Schaalia odontolytica</i>                    | 19    | 5007.16     | 4750.45      | 4623.75       | 3668.00       | 10.00       | 0.82         | 0.79          | 10            |
| <i>Haemophilus parainfluenzae T3T1</i>          | 17    | 3735.18     | 5018.24      | 4868.41       | 1421.00       | 9.76        | 0.75         | 0.73          | 10            |
| <i>Gemella haemolysans</i>                      | 16    | 4301.31     | 4544.72      | 4400.40       | 2732.50       | 9.88        | 0.96         | 0.93          | 10            |
| <i>Streptococcus sanguinis</i>                  | 13    | 2803.54     | 3092.82      | 2971.48       | 1416.00       | 10.00       | 0.82         | 0.78          | 10            |
| <i>Actinomyces sp. oral taxon 169</i>           | 9     | 2534.00     | 4237.09      | 3994.77       | 848.00        | 10.33       | 0.87         | 0.82          | 10            |
| <i>Streptococcus salivarius</i>                 | 4     | 3279.50     | 4337.62      | 3756.49       | 1497.50       | 9.75        | 0.96         | 0.83          | 9.5           |
| <i>Streptococcus sanguinis SK36</i>             | 3     | 898.00      | 805.40       | 657.61        | 433.00        | 10.00       | 1.00         | 0.82          | 10            |
| <i>Actinomyces sp. HMT 175</i>                  | 3     | 6489.00     | 10513.68     | 8584.39       | 472.00        | 9.33        | 0.58         | 0.47          | 9             |
| <i>Streptococcus cristatus ATCC 51100</i>       | 2     | 1557.00     | 1613.62      | 1141.00       | 1557.00       | 9.50        | 0.71         | 0.50          | 9.5           |
| Saliva1_R2: Commensal Bacteria                  |       |             |              |               |               |             |              |               |               |
|                                                 | reads | seqlen_mean | seqlen_stdev | seqlen_pstdev | seqlen_median | qscore_mean | qscore_stdev | qscore_pstdev | qscore_median |
| <i>Actinomyces sp. oral taxon 169</i>           | 9     | 2534.00     | 4237.09      | 3994.77       | 848.00        | 10.33       | 0.87         | 0.82          | 10            |
| <i>Cardiobacterium hominis</i>                  | 6     | 8475.67     | 7276.41      | 6642.43       | 6918.50       | 9.67        | 0.52         | 0.47          | 10            |
| <i>Capnocytophaga sputigena</i>                 | 6     | 3853.83     | 4137.45      | 3776.96       | 1763.00       | 9.33        | 0.52         | 0.47          | 9             |
| <i>Gemella sanguinis</i>                        | 4     | 2815.00     | 2159.66      | 1870.32       | 2175.50       | 9.50        | 0.58         | 0.50          | 9.5           |
| <i>Aggregatibacter segnis</i>                   | 3     | 483.33      | 284.61       | 232.38        | 376.00        | 9.67        | 0.58         | 0.47          | 10            |
| <i>Pseudopropionibacterium propionicum</i>      | 3     | 3725.33     | 4271.58      | 3487.73       | 1333.00       | 9.00        | 0.00         | 0.00          | 9             |
| <i>Actinomyces sp. HMT 175</i>                  | 3     | 6489.00     | 10513.68     | 8584.39       | 472.00        | 9.33        | 0.58         | 0.47          | 9             |
| <i>Aggregatibacter aphrophilus</i>              | 2     | 1479.00     | 1206.32      | 853.00        | 1479.00       | 10.50       | 0.71         | 0.50          | 10.5          |
| <i>Aggregatibacter aphrophilus ATCC 33389</i>   | 2     | 4183.50     | 1784.03      | 1261.50       | 4183.50       | 9.00        | 0.00         | 0.00          | 9             |
| <i>Aggregatibacter segnis ATCC 33393</i>        | 2     | 5609.50     | 5370.48      | 3797.50       | 5609.50       | 11.00       | 0.00         | 0.00          | 11            |
| Saliva1_R2: Harmful Bacteria                    |       |             |              |               |               |             |              |               |               |
|                                                 | reads | seqlen_mean | seqlen_stdev | seqlen_pstdev | seqlen_median | qscore_mean | qscore_stdev | qscore_pstdev | qscore_median |
| <i>Prevotella melaninogenica</i>                | 147   | 1216.85     | 827.82       | 825.00        | 984.00        | 9.78        | 0.89         | 0.89          | 10            |
| <i>Rothia mucilaginosa</i>                      | 105   | 3040.09     | 4526.26      | 4504.66       | 1501.00       | 9.51        | 0.67         | 0.66          | 9             |
| <i>Prevotella sp. oral taxon 299 str. F0039</i> | 86    | 1216.74     | 1125.06      | 1118.50       | 884.50        | 9.74        | 0.88         | 0.88          | 9.5           |
| <i>Neisseria subflava</i>                       | 73    | 5632.60     | 6247.08      | 6204.14       | 2897.00       | 9.64        | 0.73         | 0.73          | 10            |

|                                  |    |         |         |         |         |      |      |      |    |
|----------------------------------|----|---------|---------|---------|---------|------|------|------|----|
| <i>Streptococcus mitis</i>       | 50 | 5764.28 | 6388.25 | 6324.05 | 2841.00 | 9.64 | 0.98 | 0.97 | 9  |
| <i>Neisseria flavescens</i>      | 32 | 3936.75 | 4905.76 | 4828.50 | 1901.00 | 9.94 | 0.91 | 0.90 | 10 |
| <i>Neisseria mucosa</i>          | 26 | 4059.19 | 4307.23 | 4223.59 | 2335.50 | 9.92 | 0.98 | 0.96 | 10 |
| <i>Rothia mucilaginosa</i> DY-18 | 25 | 2371.88 | 2108.30 | 2065.70 | 1939.00 | 9.48 | 0.59 | 0.57 | 9  |
| <i>Lautropia mirabilis</i>       | 23 | 4998.96 | 5468.15 | 5347.95 | 2138.00 | 9.74 | 0.81 | 0.79 | 10 |
| <i>Prevotella jejuni</i>         | 22 | 2664.64 | 2799.04 | 2734.69 | 1705.50 | 9.64 | 0.90 | 0.88 | 9  |

| Saliva2_R1: Beneficial Bacteria               |       |             |              |               |               |             |              |               |               |
|-----------------------------------------------|-------|-------------|--------------|---------------|---------------|-------------|--------------|---------------|---------------|
|                                               | reads | seqlen_mean | seqlen_stdev | seqlen_pstdev | seqlen_median | qscore_mean | qscore_stdev | qscore_pstdev | qscore_median |
| <i>Haemophilus parainfluenzae</i>             | 13348 | 768.04      | 827.26       | 827.23        | 474.00        | 11.68       | 1.80         | 1.80          | 12            |
| <i>Streptococcus salivarius</i>               | 3034  | 840.50      | 922.37       | 922.22        | 521.50        | 11.64       | 1.77         | 1.77          | 11            |
| <i>Haemophilus parainfluenzae</i> T3T1        | 642   | 772.97      | 695.25       | 694.71        | 534.50        | 11.94       | 1.72         | 1.72          | 12            |
| <i>Gemella haemolysans</i>                    | 599   | 783.52      | 905.28       | 904.52        | 487.00        | 11.99       | 1.95         | 1.95          | 12            |
| <i>Streptococcus sanguinis</i>                | 473   | 753.59      | 785.80       | 784.97        | 462.00        | 11.55       | 1.71         | 1.71          | 11            |
| <i>Schaalia odontolytica</i>                  | 405   | 962.52      | 1218.66      | 1217.16       | 557.00        | 11.40       | 1.56         | 1.56          | 11            |
| <i>Streptococcus salivarius</i> JIM8777       | 151   | 914.30      | 794.71       | 792.08        | 607.00        | 11.89       | 1.83         | 1.83          | 12            |
| <i>Streptococcus salivarius</i> CCHSS3        | 145   | 834.17      | 724.99       | 722.48        | 575.00        | 12.23       | 1.83         | 1.83          | 12            |
| <i>Actinomyces</i> sp. oral taxon 169         | 91    | 999.13      | 989.38       | 983.93        | 541.00        | 11.38       | 1.42         | 1.41          | 11            |
| <i>Streptococcus sanguinis</i> SK36           | 65    | 802.49      | 603.50       | 598.84        | 601.00        | 12.11       | 1.71         | 1.69          | 12            |
| Saliva2_R1: Commensal Bacteria                |       |             |              |               |               |             |              |               |               |
|                                               | reads | seqlen_mean | seqlen_stdev | seqlen_pstdev | seqlen_median | qscore_mean | qscore_stdev | qscore_pstdev | qscore_median |
| <i>Aggregatibacter aphrophilus</i>            | 249   | 848.16      | 1045.68      | 1043.57       | 482.00        | 11.62       | 1.77         | 1.77          | 12            |
| <i>Gemella sanguinis</i>                      | 217   | 753.69      | 705.51       | 703.89        | 505.00        | 12.21       | 1.97         | 1.96          | 12            |
| <i>Capnocytophaga sputigena</i>               | 145   | 826.92      | 908.91       | 905.77        | 475.00        | 11.48       | 1.66         | 1.65          | 11            |
| <i>Capnocytophaga gingivalis</i>              | 112   | 796.21      | 877.12       | 873.20        | 420.50        | 11.63       | 1.67         | 1.66          | 11            |
| <i>Cardiobacterium hominis</i>                | 96    | 942.53      | 1135.61      | 1129.68       | 485.50        | 11.66       | 1.51         | 1.50          | 12            |
| <i>Actinomyces</i> sp. oral taxon 169         | 91    | 999.13      | 989.38       | 983.93        | 541.00        | 11.38       | 1.42         | 1.41          | 11            |
| <i>Capnocytophaga endodontalis</i>            | 60    | 889.93      | 858.65       | 851.46        | 518.00        | 11.63       | 2.11         | 2.09          | 11            |
| <i>Aggregatibacter aphrophilus</i> ATCC 33389 | 59    | 725.76      | 544.28       | 539.65        | 522.00        | 11.20       | 1.68         | 1.66          | 11            |
| <i>Actinomyces oris</i>                       | 54    | 1108.11     | 1967.81      | 1949.50       | 557.50        | 11.11       | 1.66         | 1.64          | 11            |
| <i>Capnocytophaga leadbetteri</i>             | 49    | 922.88      | 1097.81      | 1086.55       | 429.00        | 11.31       | 1.56         | 1.54          | 11            |
| Saliva2_R1: Harmful Bacteria                  |       |             |              |               |               |             |              |               |               |
|                                               | reads | seqlen_mean | seqlen_stdev | seqlen_pstdev | seqlen_median | qscore_mean | qscore_stdev | qscore_pstdev | qscore_median |
| <i>Prevotella melaninogenica</i>              | 7865  | 737.65      | 759.79       | 759.74        | 472.00        | 11.61       | 1.74         | 1.74          | 11            |



|                                                 |      |        |        |        |        |       |      |      |      |
|-------------------------------------------------|------|--------|--------|--------|--------|-------|------|------|------|
| <i>Streptococcus mitis</i>                      | 2644 | 739.69 | 784.16 | 784.02 | 453.00 | 11.67 | 1.75 | 1.75 | 12   |
| <i>Prevotella jejuni</i>                        | 1314 | 749.44 | 759.66 | 759.37 | 471.00 | 11.57 | 1.75 | 1.75 | 11   |
| <i>Rothia mucilaginosa</i>                      | 1076 | 829.42 | 929.18 | 928.74 | 505.00 | 11.02 | 1.50 | 1.50 | 11   |
| <i>Neisseria subflava</i>                       | 1029 | 830.48 | 915.82 | 915.37 | 482.00 | 11.51 | 1.67 | 1.67 | 11   |
| <i>Haemophilus haemolyticus</i>                 | 1026 | 725.07 | 699.35 | 699.01 | 475.00 | 11.79 | 1.75 | 1.75 | 12   |
| <i>Prevotella sp. oral taxon 299 str. F0039</i> | 924  | 669.96 | 645.53 | 645.18 | 450.00 | 11.76 | 1.74 | 1.74 | 12   |
| <i>Haemophilus sp. oral taxon 036</i>           | 836  | 838.95 | 984.23 | 983.64 | 487.50 | 11.81 | 1.78 | 1.78 | 12   |
| <i>Haemophilus influenzae</i>                   | 648  | 663.48 | 695.86 | 695.32 | 441.50 | 11.62 | 1.78 | 1.77 | 11.5 |
| <i>Prevotella intermedia</i>                    | 498  | 726.08 | 773.61 | 772.83 | 457.50 | 11.66 | 1.79 | 1.78 | 12   |

| Saliva2_R2: Beneficial Bacteria               |       |             |              |               |               |             |              |               |               |
|-----------------------------------------------|-------|-------------|--------------|---------------|---------------|-------------|--------------|---------------|---------------|
|                                               | reads | seqlen_mean | seqlen_stdev | seqlen_pstdev | seqlen_median | qscore_mean | qscore_stdev | qscore_pstdev | qscore_median |
| <i>Haemophilus parainfluenzae</i>             | 2890  | 836.46      | 900.82       | 900.67        | 562.00        | 10.11       | 1.09         | 1.09          | 10            |
| <i>Streptococcus salivarius</i>               | 794   | 856.61      | 1017.57      | 1016.93       | 558.00        | 10.09       | 1.07         | 1.07          | 10            |
| <i>Gemella haemolysans</i>                    | 132   | 818.05      | 796.73       | 793.70        | 580.00        | 10.49       | 1.24         | 1.23          | 10            |
| <i>Haemophilus parainfluenzae T3T1</i>        | 117   | 837.78      | 722.06       | 718.97        | 583.00        | 9.94        | 0.94         | 0.94          | 10            |
| <i>Schaalia odontolytica</i>                  | 117   | 750.74      | 822.20       | 818.68        | 472.00        | 9.71        | 0.82         | 0.82          | 10            |
| <i>Streptococcus sanguinis</i>                | 108   | 911.94      | 1153.83      | 1148.48       | 565.00        | 10.05       | 1.06         | 1.06          | 10            |
| <i>Streptococcus salivarius CCHSS3</i>        | 36    | 1015.25     | 1395.53      | 1376.01       | 565.00        | 10.17       | 1.18         | 1.17          | 10            |
| <i>Streptococcus salivarius JIM8777</i>       | 33    | 932.33      | 966.26       | 951.51        | 652.00        | 10.27       | 1.38         | 1.35          | 10            |
| <i>Actinomyces sp. oral taxon 169</i>         | 24    | 801.79      | 727.54       | 712.22        | 536.50        | 9.96        | 1.27         | 1.24          | 10            |
| <i>Streptococcus sanguinis SK36</i>           | 21    | 571.38      | 315.73       | 308.12        | 475.00        | 10.38       | 1.24         | 1.21          | 10            |
| Saliva2_R2: Commensal Bacteria                |       |             |              |               |               |             |              |               |               |
|                                               | reads | seqlen_mean | seqlen_stdev | seqlen_pstdev | seqlen_median | qscore_mean | qscore_stdev | qscore_pstdev | qscore_median |
| <i>Gemella sanguinis</i>                      | 65    | 977.71      | 1267.49      | 1257.70       | 539.00        | 10.31       | 1.16         | 1.15          | 10            |
| <i>Aggregatibacter aphrophilus</i>            | 54    | 803.74      | 795.97       | 788.56        | 589.00        | 9.98        | 1.22         | 1.21          | 10            |
| <i>Capnocytophaga sputigena</i>               | 28    | 1004.68     | 826.50       | 811.60        | 784.50        | 9.75        | 0.93         | 0.91          | 9.5           |
| <i>Actinomyces sp. oral taxon 169</i>         | 24    | 801.79      | 727.54       | 712.22        | 536.50        | 9.96        | 1.27         | 1.24          | 10            |
| <i>Capnocytophaga gingivalis</i>              | 23    | 703.39      | 756.98       | 740.34        | 418.00        | 10.13       | 1.14         | 1.12          | 10            |
| <i>Cardiobacterium hominis</i>                | 16    | 682.88      | 779.24       | 754.50        | 508.50        | 10.75       | 0.93         | 0.90          | 11            |
| <i>Actinomyces oris</i>                       | 15    | 922.00      | 1203.91      | 1163.09       | 590.00        | 9.93        | 0.70         | 0.68          | 10            |
| <i>Aggregatibacter aphrophilus NJ8700</i>     | 13    | 447.00      | 304.14       | 292.21        | 370.00        | 10.77       | 1.17         | 1.12          | 11            |
| <i>Aggregatibacter aphrophilus ATCC 33389</i> | 12    | 692.08      | 334.76       | 320.51        | 580.00        | 10.50       | 1.17         | 1.12          | 10            |
| <i>Capnocytophaga</i>                         | 12    | 668.00      | 567.90       | 543.72        | 492.50        | 9.33        | 0.49         | 0.47          | 9             |

### Saliva2\_R2: Harmful Bacteria

|                                                 | reads | seqlen_mean | seqlen_stdev | seqlen_pstdev | seqlen_median | qscore_mean | qscore_stdev | qscore_pstdev | qscore_median |
|-------------------------------------------------|-------|-------------|--------------|---------------|---------------|-------------|--------------|---------------|---------------|
| <i>Prevotella melaninogenica</i>                | 1890  | 733.59      | 745.74       | 745.55        | 513.00        | 10.07       | 1.07         | 1.07          | 10            |
| <i>Streptococcus mitis</i>                      | 676   | 803.39      | 756.15       | 755.59        | 553.50        | 10.08       | 1.04         | 1.03          | 10            |
| <i>Prevotella jejuni</i>                        | 305   | 777.83      | 890.30       | 888.84        | 525.00        | 9.95        | 1.05         | 1.05          | 10            |
| <i>Rothia mucilaginosa</i>                      | 279   | 837.38      | 953.87       | 952.16        | 522.00        | 9.76        | 0.88         | 0.87          | 10            |
| <i>Neisseria subflava</i>                       | 207   | 888.38      | 1164.29      | 1161.47       | 618.00        | 10.01       | 1.01         | 1.00          | 10            |
| <i>Haemophilus haemolyticus</i>                 | 199   | 1043.96     | 1429.08      | 1425.48       | 546.00        | 10.17       | 1.03         | 1.03          | 10            |
| <i>Prevotella sp. oral taxon 299 str. F0039</i> | 176   | 621.89      | 583.03       | 581.37        | 458.50        | 10.31       | 1.13         | 1.13          | 10            |
| <i>Haemophilus sp. oral taxon 036</i>           | 164   | 1017.40     | 1340.87      | 1336.78       | 562.50        | 10.23       | 1.11         | 1.11          | 10            |
| <i>Prevotella intermedia</i>                    | 139   | 700.46      | 583.69       | 581.58        | 498.00        | 10.14       | 1.21         | 1.20          | 10            |
| <i>Haemophilus influenzae</i>                   | 136   | 772.99      | 809.02       | 806.04        | 569.00        | 9.92        | 1.01         | 1.01          | 10            |

### Saliva3\_R1: Beneficial Bacteria

|                                        | reads | seqlen_mean | seqlen_stdev | seqlen_pstdev | seqlen_median | qscore_mean | qscore_stdev | qscore_pstdev | qscore_median |
|----------------------------------------|-------|-------------|--------------|---------------|---------------|-------------|--------------|---------------|---------------|
| <i>Haemophilus parainfluenzae</i>      | 883   | 549.92      | 443.45       | 443.20        | 385.00        | 10.91       | 1.53         | 1.53          | 11            |
| <i>Schaalia odontolytica</i>           | 802   | 589.87      | 474.56       | 474.26        | 421.50        | 10.77       | 1.31         | 1.31          | 11            |
| <i>Gemella haemolysans</i>             | 526   | 535.10      | 444.80       | 444.38        | 398.00        | 11.21       | 1.68         | 1.67          | 11            |
| <i>Streptococcus salivarius</i>        | 455   | 567.61      | 423.89       | 423.43        | 418.00        | 10.93       | 1.49         | 1.48          | 11            |
| <i>Schaalia meyeri</i>                 | 112   | 478.91      | 275.72       | 274.48        | 385.50        | 10.80       | 1.31         | 1.31          | 11            |
| <i>Actinomyces pacaensis</i>           | 70    | 532.91      | 455.08       | 451.82        | 381.00        | 10.59       | 1.40         | 1.39          | 10            |
| <i>Haemophilus parainfluenzae T3T1</i> | 64    | 571.73      | 384.99       | 381.97        | 461.50        | 10.86       | 1.52         | 1.51          | 11            |
| <i>Actinomyces oris</i>                | 52    | 659.13      | 583.83       | 578.19        | 423.00        | 10.77       | 1.26         | 1.25          | 11            |
| <i>Streptococcus gordonii</i>          | 45    | 410.56      | 163.73       | 161.90        | 333.00        | 10.78       | 1.46         | 1.44          | 11            |
| <i>Streptococcus sanguinis</i>         | 44    | 522.61      | 307.75       | 304.24        | 442.50        | 10.52       | 1.41         | 1.39          | 10            |

### Saliva3\_R1: Commensal Bacteria

|                                 | reads | seqlen_mean | seqlen_stdev | seqlen_pstdev | seqlen_median | qscore_mean | qscore_stdev | qscore_pstdev | qscore_median |
|---------------------------------|-------|-------------|--------------|---------------|---------------|-------------|--------------|---------------|---------------|
| <i>Capnocytophaga sputigena</i> | 85    | 546.06      | 354.50       | 352.41        | 412.00        | 11.20       | 1.45         | 1.45          | 11            |
| <i>Eikenella corrodens</i>      | 80    | 558.41      | 430.59       | 427.89        | 405.50        | 10.59       | 1.26         | 1.25          | 11            |
| <i>Actinobacteria</i>           | 78    | 418.92      | 217.53       | 216.13        | 352.00        | 10.59       | 1.31         | 1.31          | 10            |
| <i>Actinomyces pacaensis</i>    | 70    | 532.91      | 455.08       | 451.82        | 381.00        | 10.59       | 1.40         | 1.39          | 10            |
| <i>Abiotrophia defectiva</i>    | 64    | 559.63      | 284.21       | 281.98        | 464.50        | 10.72       | 1.36         | 1.35          | 11            |
| <i>Actinomyces oris</i>         | 52    | 659.13      | 583.83       | 578.19        | 423.00        | 10.77       | 1.26         | 1.25          | 11            |
| <i>Aggregatibacter segnis</i>   | 47    | 666.47      | 570.71       | 564.61        | 426.00        | 10.98       | 1.41         | 1.39          | 11            |

|                                            |       |             |              |               |               |             |              |               |               |
|--------------------------------------------|-------|-------------|--------------|---------------|---------------|-------------|--------------|---------------|---------------|
| <i>Kingella denitrificans</i>              | 43    | 494.91      | 300.81       | 297.29        | 351.00        | 11.05       | 1.33         | 1.31          | 11            |
| <i>Ottowia sp. oral taxon 894</i>          | 40    | 494.33      | 381.04       | 376.25        | 356.50        | 10.43       | 1.11         | 1.09          | 10            |
| <i>Pseudopropionibacterium propionicum</i> | 39    | 589.03      | 448.11       | 442.33        | 357.00        | 10.74       | 1.39         | 1.37          | 11            |
| <b>Saliva3_R1: Harmful Bacteria</b>        |       |             |              |               |               |             |              |               |               |
|                                            | reads | seqlen_mean | seqlen_stdev | seqlen_pstdev | seqlen_median | qscore_mean | qscore_stdev | qscore_pstdev | qscore_median |
| <i>Rothia mucilaginosa</i>                 | 4232  | 553.26      | 442.13       | 442.08        | 397.00        | 10.60       | 1.28         | 1.28          | 10            |
| <i>Neisseria subflava</i>                  | 3905  | 591.99      | 494.60       | 494.53        | 418.00        | 10.86       | 1.39         | 1.39          | 11            |
| <i>Neisseria mucosa</i>                    | 1614  | 567.27      | 444.96       | 444.82        | 411.50        | 10.82       | 1.39         | 1.39          | 11            |
| <i>Neisseria flavescens</i>                | 1385  | 580.08      | 488.01       | 487.84        | 409.00        | 10.80       | 1.44         | 1.44          | 11            |
| <i>Rothia mucilaginosa</i> DY-18           | 1337  | 598.71      | 466.08       | 465.91        | 437.00        | 10.73       | 1.36         | 1.36          | 11            |
| <i>Neisseria</i>                           | 1307  | 408.89      | 256.45       | 256.35        | 318.00        | 10.35       | 1.25         | 1.25          | 10            |
| <i>Prevotella melaninogenica</i>           | 530   | 510.59      | 351.14       | 350.81        | 385.00        | 10.84       | 1.46         | 1.46          | 11            |
| <i>Campylobacter concisus</i>              | 482   | 497.64      | 350.14       | 349.78        | 370.00        | 10.61       | 1.33         | 1.33          | 10            |
| <i>Escherichia coli</i>                    | 472   | 577.41      | 430.56       | 430.11        | 420.00        | 10.85       | 1.47         | 1.47          | 11            |
| <i>Streptococcus mitis</i>                 | 451   | 525.09      | 385.66       | 385.23        | 396.00        | 11.10       | 1.54         | 1.54          | 11            |

|                                           |       |             |              |               |               |             |              |               |               |
|-------------------------------------------|-------|-------------|--------------|---------------|---------------|-------------|--------------|---------------|---------------|
| <b>Saliva3_R2: Beneficial Bacteria</b>    |       |             |              |               |               |             |              |               |               |
|                                           | reads | seqlen_mean | seqlen_stdev | seqlen_pstdev | seqlen_median | qscore_mean | qscore_stdev | qscore_pstdev | qscore_median |
| <i>Haemophilus parainfluenzae</i>         | 494   | 469.70      | 267.78       | 267.51        | 371.00        | 10.96       | 1.45         | 1.45          | 11            |
| <i>Schaalia odontolytica</i>              | 363   | 467.12      | 272.84       | 272.46        | 373.00        | 10.91       | 1.32         | 1.32          | 11            |
| <i>Gemella haemolysans</i>                | 319   | 492.47      | 340.36       | 339.82        | 389.00        | 11.61       | 1.83         | 1.83          | 11            |
| <i>Streptococcus salivarius</i>           | 229   | 513.80      | 373.04       | 372.23        | 385.00        | 11.01       | 1.48         | 1.47          | 11            |
| <i>Schaalia meyeri</i>                    | 49    | 463.98      | 257.46       | 254.82        | 380.00        | 10.86       | 1.26         | 1.25          | 11            |
| <i>Haemophilus parainfluenzae</i> T3T1    | 37    | 440.27      | 206.49       | 203.68        | 396.00        | 10.86       | 1.36         | 1.34          | 11            |
| <i>Streptococcus sanguinis</i>            | 23    | 468.17      | 270.00       | 264.06        | 390.00        | 11.04       | 1.80         | 1.76          | 11            |
| <i>Actinomyces oris</i>                   | 20    | 475.70      | 265.35       | 258.63        | 369.50        | 10.75       | 1.12         | 1.09          | 11            |
| <i>Streptococcus cristatus</i> ATCC 51100 | 17    | 429.59      | 237.68       | 230.59        | 347.00        | 11.76       | 1.35         | 1.31          | 12            |
| <i>Actinomyces pacaensis</i>              | 17    | 462.18      | 231.06       | 224.16        | 380.00        | 10.76       | 1.25         | 1.21          | 11            |
| <b>Saliva3_R2: Commensal Bacteria</b>     |       |             |              |               |               |             |              |               |               |
|                                           | reads | seqlen_mean | seqlen_stdev | seqlen_pstdev | seqlen_median | qscore_mean | qscore_stdev | qscore_pstdev | qscore_median |
| <i>Capnocytophaga sputigena</i>           | 51    | 539.53      | 377.16       | 373.45        | 388.00        | 11.14       | 1.33         | 1.31          | 11            |
| <i>Eikenella corrodens</i>                | 37    | 389.27      | 164.53       | 162.29        | 360.00        | 11.08       | 1.19         | 1.17          | 11            |
| <i>Actinobacteria</i>                     | 30    | 399.20      | 166.92       | 164.11        | 334.00        | 10.80       | 1.42         | 1.40          | 10            |
| <i>Kingella denitrificans</i>             | 25    | 516.20      | 371.32       | 363.82        | 404.00        | 10.88       | 1.36         | 1.34          | 11            |

|                                     |       |             |              |               |               |             |              |               |               |
|-------------------------------------|-------|-------------|--------------|---------------|---------------|-------------|--------------|---------------|---------------|
| <i>Abiotrophia defectiva</i>        | 22    | 408.55      | 193.89       | 189.44        | 386.50        | 10.91       | 1.19         | 1.16          | 11            |
| <i>Gemella sanguinis</i>            | 21    | 559.48      | 319.29       | 311.59        | 443.00        | 11.05       | 1.66         | 1.62          | 11            |
| <i>Actinomyces oris</i>             | 20    | 475.70      | 265.35       | 258.63        | 369.50        | 10.75       | 1.12         | 1.09          | 11            |
| <i>Proteobacteria</i>               | 20    | 354.05      | 139.59       | 136.05        | 274.50        | 10.25       | 1.16         | 1.13          | 10            |
| <i>Actinomyces pacaensis</i>        | 17    | 462.18      | 231.06       | 224.16        | 380.00        | 10.76       | 1.25         | 1.21          | 11            |
| <i>Gemella morbillorum</i>          | 17    | 465.06      | 181.87       | 176.44        | 380.00        | 11.65       | 1.77         | 1.71          | 12            |
| <b>Saliva3_R2: Harmful Bacteria</b> |       |             |              |               |               |             |              |               |               |
|                                     | reads | seqlen_mean | seqlen_stdev | seqlen_pstdev | seqlen_median | qscore_mean | qscore_stdev | qscore_pstdev | qscore_median |
| <i>Rothia mucilaginosa</i>          | 2244  | 472.15      | 299.05       | 298.98        | 374.50        | 10.72       | 1.30         | 1.30          | 11            |
| <i>Neisseria subflava</i>           | 2118  | 510.45      | 362.07       | 361.98        | 392.00        | 11.06       | 1.44         | 1.44          | 11            |
| <i>Neisseria mucosa</i>             | 781   | 495.98      | 349.50       | 349.27        | 381.00        | 11.01       | 1.43         | 1.42          | 11            |
| <i>Neisseria flavescens</i>         | 726   | 493.27      | 304.91       | 304.70        | 383.50        | 11.02       | 1.47         | 1.47          | 11            |
| <i>Neisseria</i>                    | 673   | 385.08      | 200.80       | 200.65        | 321.00        | 10.67       | 1.35         | 1.35          | 10            |
| <i>Rothia mucilaginosa</i> DY-18    | 672   | 507.59      | 351.63       | 351.37        | 388.00        | 10.85       | 1.33         | 1.33          | 11            |
| <i>Prevotella melaninogenica</i>    | 302   | 444.28      | 247.47       | 247.06        | 363.50        | 11.03       | 1.61         | 1.61          | 11            |
| <i>Campylobacter concisus</i>       | 268   | 456.25      | 278.83       | 278.31        | 372.50        | 10.86       | 1.38         | 1.38          | 11            |
| <i>Escherichia coli</i>             | 253   | 519.11      | 338.61       | 337.94        | 399.00        | 11.13       | 1.43         | 1.43          | 11            |
| <i>Streptococcus mitis</i>          | 241   | 519.20      | 314.38       | 313.72        | 413.00        | 11.12       | 1.43         | 1.43          | 11            |

|                                           |       |             |              |               |               |             |              |               |               |
|-------------------------------------------|-------|-------------|--------------|---------------|---------------|-------------|--------------|---------------|---------------|
| <b>Stool1_R1: Beneficial Bacteria</b>     |       |             |              |               |               |             |              |               |               |
|                                           | reads | seqlen_mean | seqlen_stdev | seqlen_pstdev | seqlen_median | qscore_mean | qscore_stdev | qscore_pstdev | qscore_median |
| <i>Lactobacillus ruminis</i> ATCC 27782   | 6066  | 462.83      | 317.60       | 317.57        | 357.00        | 11.46       | 1.66         | 1.66          | 11            |
| <i>Bifidobacterium adolescentis</i>       | 4637  | 440.23      | 299.16       | 299.13        | 339.00        | 11.08       | 1.48         | 1.48          | 11            |
| <i>Bifidobacterium longum</i>             | 2397  | 420.21      | 281.57       | 281.51        | 329.00        | 10.95       | 1.44         | 1.44          | 11            |
| <i>Collinsella aerofaciens</i>            | 1391  | 431.13      | 294.24       | 294.14        | 335.00        | 10.93       | 1.41         | 1.41          | 11            |
| <i>Bifidobacterium pseudocatenulatum</i>  | 483   | 417.66      | 223.81       | 223.58        | 338.00        | 11.09       | 1.49         | 1.49          | 11            |
| <i>Bacteroides thetaiotaomicron</i>       | 384   | 419.05      | 227.59       | 227.29        | 348.00        | 11.12       | 1.58         | 1.58          | 11            |
| <i>Bacteroides uniformis</i>              | 301   | 479.55      | 318.46       | 317.93        | 374.00        | 11.27       | 1.71         | 1.71          | 11            |
| <i>Collinsella aerofaciens</i> ATCC 25986 | 288   | 461.43      | 306.02       | 305.49        | 357.50        | 11.07       | 1.39         | 1.39          | 11            |
| <i>Bacteroides dorei</i> CL03T12C01       | 275   | 463.63      | 255.95       | 255.49        | 374.00        | 11.52       | 1.56         | 1.56          | 11            |
| <i>Bacteroides fragilis</i>               | 269   | 440.92      | 258.41       | 257.93        | 367.00        | 11.29       | 1.67         | 1.67          | 11            |
| <b>Stool1_R1: Commensal Bacteria</b>      |       |             |              |               |               |             |              |               |               |
|                                           | reads | seqlen_mean | seqlen_stdev | seqlen_pstdev | seqlen_median | qscore_mean | qscore_stdev | qscore_pstdev | qscore_median |
| <i>Phocaeicola dorei</i>                  | 4519  | 428.32      | 263.54       | 263.51        | 352.00        | 11.27       | 1.65         | 1.65          | 11            |

|                                     |      |        |        |        |        |       |      |      |    |
|-------------------------------------|------|--------|--------|--------|--------|-------|------|------|----|
| <i>Anaerostipes hadrus</i>          | 2431 | 465.11 | 312.70 | 312.64 | 365.00 | 11.48 | 1.75 | 1.75 | 11 |
| <i>Blautia</i> sp. SC05B48          | 2214 | 461.25 | 320.66 | 320.59 | 363.00 | 11.27 | 1.62 | 1.62 | 11 |
| <i>Faecalibacterium prausnitzii</i> | 1676 | 445.64 | 309.44 | 309.35 | 346.00 | 11.10 | 1.44 | 1.44 | 11 |
| <i>Escherichia coli</i>             | 1063 | 524.94 | 334.07 | 333.91 | 411.00 | 11.23 | 1.57 | 1.57 | 11 |
| <i>Anaerobutyricum hallii</i>       | 1048 | 527.96 | 446.95 | 446.74 | 387.50 | 11.51 | 1.75 | 1.75 | 11 |
| <i>Faecalibacillus intestinalis</i> | 848  | 522.90 | 333.70 | 333.50 | 406.00 | 11.90 | 1.91 | 1.91 | 12 |
| <i>Dialister hominis</i>            | 644  | 508.46 | 341.92 | 341.66 | 398.00 | 11.22 | 1.46 | 1.46 | 11 |
| <i>Bacteroides</i>                  | 530  | 395.00 | 218.77 | 218.56 | 328.50 | 11.11 | 1.53 | 1.53 | 11 |
| <i>Bifidobacterium</i>              | 409  | 357.18 | 188.46 | 188.23 | 297.00 | 10.73 | 1.47 | 1.47 | 10 |

#### Stool1\_R1: Harmful Bacteria

|                                                     | reads | seqlen_mean | seqlen_stdev | seqlen_pstdev | seqlen_median | qscore_mean | qscore_stdev | qscore_pstdev | qscore_median |
|-----------------------------------------------------|-------|-------------|--------------|---------------|---------------|-------------|--------------|---------------|---------------|
| <i>Acidaminococcus intestini</i> RyC-MR95           | 179   | 452.55      | 359.02       | 358.01        | 357.00        | 11.17       | 1.56         | 1.55          | 11            |
| <i>Alistipes onderdonkii</i> subsp. <i>vulgaris</i> | 134   | 410.01      | 267.03       | 266.03        | 328.00        | 10.80       | 1.38         | 1.37          | 11            |
| <i>Roseburia hominis</i>                            | 127   | 448.18      | 232.10       | 231.18        | 361.00        | 11.40       | 1.64         | 1.64          | 11            |
| <i>Clostridioides difficile</i>                     | 118   | 471.91      | 284.48       | 283.27        | 394.00        | 11.45       | 1.59         | 1.58          | 11            |
| <i>Eggerthella lenta</i>                            | 61    | 425.75      | 274.23       | 271.97        | 356.00        | 10.79       | 1.20         | 1.19          | 11            |
| <i>[Clostridium]</i> <i>innocuum</i>                | 59    | 449.56      | 226.44       | 224.51        | 406.00        | 11.17       | 1.53         | 1.52          | 11            |
| <i>Eggerthella lenta</i> DSM 2243                   | 39    | 480.18      | 279.86       | 276.25        | 370.00        | 11.00       | 1.50         | 1.48          | 11            |
| <i>Enterococcus faecium</i>                         | 25    | 460.60      | 187.60       | 183.81        | 396.00        | 10.96       | 1.65         | 1.61          | 11            |
| <i>Escherichia</i>                                  | 25    | 354.64      | 119.56       | 117.14        | 330.00        | 10.68       | 1.46         | 1.43          | 10            |
| <i>Shigella flexneri</i>                            | 23    | 524.30      | 281.94       | 275.74        | 439.00        | 11.13       | 1.71         | 1.68          | 11            |

#### Stool1\_R2: Beneficial Bacteria

|                                           | reads | seqlen_mean | seqlen_stdev | seqlen_pstdev | seqlen_median | qscore_mean | qscore_stdev | qscore_pstdev | qscore_median |
|-------------------------------------------|-------|-------------|--------------|---------------|---------------|-------------|--------------|---------------|---------------|
| <i>Lactobacillus ruminis</i> ATCC 27782   | 8599  | 503.68      | 374.49       | 374.47        | 379.00        | 11.38       | 1.63         | 1.63          | 11            |
| <i>Bifidobacterium adolescentis</i>       | 8183  | 470.76      | 366.08       | 366.05        | 353.00        | 11.05       | 1.49         | 1.49          | 11            |
| <i>Bifidobacterium longum</i>             | 4170  | 454.32      | 342.44       | 342.40        | 341.00        | 10.92       | 1.47         | 1.47          | 11            |
| <i>Collinsella aerofaciens</i>            | 2425  | 454.79      | 329.75       | 329.69        | 347.00        | 10.83       | 1.39         | 1.39          | 11            |
| <i>Bifidobacterium pseudocatenulatum</i>  | 811   | 464.19      | 367.53       | 367.31        | 342.00        | 11.11       | 1.50         | 1.50          | 11            |
| <i>Bacteroides thetaiotaomicron</i>       | 563   | 438.54      | 271.86       | 271.62        | 340.00        | 11.06       | 1.64         | 1.64          | 11            |
| <i>Collinsella aerofaciens</i> ATCC 25986 | 474   | 508.71      | 369.94       | 369.55        | 392.00        | 11.12       | 1.47         | 1.47          | 11            |
| <i>Bacteroides uniformis</i>              | 473   | 472.65      | 321.57       | 321.23        | 371.00        | 11.25       | 1.56         | 1.56          | 11            |
| <i>Bacteroides dorei</i> CL03T12C01       | 470   | 545.58      | 461.99       | 461.50        | 403.50        | 11.51       | 1.68         | 1.67          | 11            |
| <i>Bacteroides fragilis</i>               | 392   | 495.52      | 377.30       | 376.82        | 363.00        | 11.17       | 1.58         | 1.58          | 11            |

| Stool1_R2: Commensal Bacteria                       |       |             |              |               |               |             |              |               |               |
|-----------------------------------------------------|-------|-------------|--------------|---------------|---------------|-------------|--------------|---------------|---------------|
|                                                     | reads | seqlen_mean | seqlen_stdev | seqlen_pstdev | seqlen_median | qscore_mean | qscore_stdev | qscore_pstdev | qscore_median |
| <i>Phocaeicola dorei</i>                            | 6733  | 458.05      | 322.07       | 322.05        | 357.00        | 11.25       | 1.65         | 1.65          | 11            |
| <i>Blautia</i> sp. SC05B48                          | 3258  | 479.36      | 338.52       | 338.47        | 369.00        | 11.25       | 1.63         | 1.63          | 11            |
| <i>Faecalibacterium prausnitzii</i>                 | 3006  | 469.80      | 343.97       | 343.91        | 360.00        | 11.12       | 1.54         | 1.54          | 11            |
| <i>Anaerostipes hadrus</i>                          | 2943  | 483.59      | 329.20       | 329.14        | 378.00        | 11.39       | 1.72         | 1.72          | 11            |
| <i>Anaerobutyricum hallii</i>                       | 1468  | 535.35      | 409.27       | 409.13        | 400.00        | 11.49       | 1.72         | 1.72          | 11            |
| <i>Dialister hominis</i>                            | 1100  | 549.49      | 394.54       | 394.36        | 417.00        | 11.21       | 1.56         | 1.56          | 11            |
| <i>Escherichia coli</i>                             | 1041  | 576.95      | 460.12       | 459.90        | 431.00        | 11.14       | 1.55         | 1.55          | 11            |
| <i>Faecalibacillus intestinalis</i>                 | 943   | 629.74      | 526.85       | 526.57        | 461.00        | 11.95       | 1.88         | 1.88          | 12            |
| <i>Bacteroides</i>                                  | 797   | 421.97      | 297.40       | 297.21        | 333.00        | 11.07       | 1.58         | 1.58          | 11            |
| <i>Bifidobacterium</i>                              | 731   | 378.85      | 264.77       | 264.58        | 292.00        | 10.71       | 1.45         | 1.44          | 10            |
| Stool1_R2: Harmful Bacteria                         |       |             |              |               |               |             |              |               |               |
|                                                     | reads | seqlen_mean | seqlen_stdev | seqlen_pstdev | seqlen_median | qscore_mean | qscore_stdev | qscore_pstdev | qscore_median |
| <i>Acidaminococcus intestini</i> RyC-MR95           | 268   | 485.40      | 331.75       | 331.13        | 382.00        | 11.09       | 1.55         | 1.55          | 11            |
| <i>Alistipes onderdonkii</i> subsp. <i>vulgaris</i> | 205   | 434.98      | 297.16       | 296.44        | 338.00        | 10.93       | 1.51         | 1.51          | 11            |
| <i>Roseburia hominis</i>                            | 189   | 494.42      | 359.76       | 358.80        | 381.00        | 11.22       | 1.54         | 1.53          | 11            |
| <i>Clostridioides difficile</i>                     | 161   | 541.77      | 400.33       | 399.09        | 414.00        | 11.06       | 1.58         | 1.57          | 11            |
| <i>Eggerthella lenta</i>                            | 103   | 423.83      | 304.39       | 302.91        | 324.00        | 10.75       | 1.53         | 1.52          | 11            |
| <i>[Clostridium]</i> <i>innocuum</i>                | 101   | 508.01      | 404.30       | 402.29        | 354.00        | 11.33       | 1.86         | 1.85          | 11            |
| <i>Eggerthella lenta</i> DSM 2243                   | 84    | 483.75      | 295.71       | 293.95        | 408.00        | 10.77       | 1.33         | 1.32          | 11            |
| <i>Enterococcus faecium</i>                         | 40    | 581.38      | 346.18       | 341.83        | 448.00        | 11.48       | 1.58         | 1.57          | 11            |
| <i>Escherichia</i>                                  | 36    | 507.50      | 412.37       | 406.61        | 382.00        | 10.50       | 1.25         | 1.24          | 10            |
| <i>Hungatella hathewayi</i> WAL-18680               | 27    | 488.74      | 267.84       | 262.83        | 385.00        | 11.00       | 1.41         | 1.39          | 11            |

| Stool2_R1: Beneficial Bacteria        |       |             |              |               |               |             |              |               |               |
|---------------------------------------|-------|-------------|--------------|---------------|---------------|-------------|--------------|---------------|---------------|
|                                       | reads | seqlen_mean | seqlen_stdev | seqlen_pstdev | seqlen_median | qscore_mean | qscore_stdev | qscore_pstdev | qscore_median |
| <i>Akkermansia muciniphila</i>        | 1177  | 461.73      | 232.01       | 231.91        | 395.00        | 10.44       | 1.25         | 1.25          | 10            |
| <i>Bifidobacterium adolescentis</i>   | 552   | 467.99      | 230.85       | 230.64        | 400.50        | 10.53       | 1.22         | 1.22          | 10            |
| <i>Bacteroides ovatus</i>             | 498   | 487.73      | 252.59       | 252.33        | 410.50        | 10.76       | 1.42         | 1.41          | 11            |
| <i>Bacteroides uniformis</i>          | 225   | 470.24      | 220.60       | 220.11        | 409.00        | 10.60       | 1.25         | 1.25          | 10            |
| <i>Odoribacter splanchnicus</i>       | 204   | 478.44      | 252.48       | 251.86        | 400.50        | 10.74       | 1.23         | 1.23          | 11            |
| <i>Bacteroides fragilis</i>           | 203   | 445.21      | 216.84       | 216.31        | 389.00        | 10.83       | 1.50         | 1.50          | 11            |
| <i>Bacteroides vulgatus</i> ATCC 8482 | 184   | 514.80      | 289.49       | 288.70        | 415.50        | 10.55       | 1.35         | 1.35          | 10            |

|                                                     |       |             |              |               |               |             |              |               |               |
|-----------------------------------------------------|-------|-------------|--------------|---------------|---------------|-------------|--------------|---------------|---------------|
| <i>Bacteroides thetaiotaomicron</i>                 | 160   | 456.83      | 212.97       | 212.30        | 391.50        | 10.55       | 1.22         | 1.21          | 10            |
| <i>Bifidobacterium longum</i>                       | 157   | 463.53      | 274.60       | 273.72        | 390.00        | 10.55       | 1.33         | 1.32          | 10            |
| <i>Bifidobacterium pseudocatenulatum</i>            | 102   | 459.66      | 217.31       | 216.24        | 393.50        | 10.44       | 1.13         | 1.13          | 10            |
| <b>Stool2_R1: Commensal Bacteria</b>                |       |             |              |               |               |             |              |               |               |
|                                                     | reads | seqlen_mean | seqlen_stdev | seqlen_pstdev | seqlen_median | qscore_mean | qscore_stdev | qscore_pstdev | qscore_median |
| <i>Megamonas funiformis</i>                         | 7697  | 468.75      | 249.06       | 249.05        | 388.00        | 10.96       | 1.54         | 1.54          | 11            |
| <i>Phocaeicola dorei</i>                            | 1744  | 465.77      | 231.13       | 231.07        | 387.00        | 10.76       | 1.41         | 1.41          | 11            |
| <i>Anaerobutyricum hallii</i>                       | 999   | 464.27      | 243.42       | 243.30        | 391.00        | 10.83       | 1.44         | 1.44          | 11            |
| <i>Anaerostipes hadrus</i>                          | 578   | 469.46      | 238.25       | 238.04        | 389.00        | 10.77       | 1.36         | 1.36          | 11            |
| <i>Blautia</i> sp. SC05B48                          | 413   | 478.95      | 233.21       | 232.93        | 410.00        | 10.74       | 1.35         | 1.35          | 11            |
| <i>Bacteroides</i>                                  | 410   | 433.59      | 189.20       | 188.97        | 374.00        | 10.63       | 1.32         | 1.32          | 10            |
| <i>Parabacteroides distasonis</i>                   | 363   | 487.75      | 257.11       | 256.75        | 398.00        | 10.74       | 1.30         | 1.29          | 11            |
| <i>Escherichia coli</i>                             | 349   | 486.87      | 234.01       | 233.68        | 417.00        | 10.62       | 1.39         | 1.39          | 10            |
| <i>Phocaeicola vulgatus</i>                         | 307   | 456.73      | 209.30       | 208.96        | 398.00        | 10.72       | 1.41         | 1.41          | 10            |
| <i>Bacteroides caccae</i>                           | 191   | 449.29      | 237.29       | 236.67        | 360.00        | 10.66       | 1.41         | 1.40          | 10            |
| <b>Stool2_R1: Harmful Bacteria</b>                  |       |             |              |               |               |             |              |               |               |
|                                                     | reads | seqlen_mean | seqlen_stdev | seqlen_pstdev | seqlen_median | qscore_mean | qscore_stdev | qscore_pstdev | qscore_median |
| <i>Desulfovibrio piger</i>                          | 128   | 447.03      | 241.42       | 240.47        | 376.50        | 10.44       | 1.22         | 1.22          | 10            |
| <i>Alistipes onderdonkii</i> subsp. <i>vulgaris</i> | 71    | 454.30      | 258.26       | 256.43        | 394.00        | 10.51       | 1.12         | 1.11          | 10            |
| <i>Roseburia hominis</i>                            | 60    | 436.72      | 172.11       | 170.67        | 370.00        | 10.53       | 1.24         | 1.23          | 10            |
| <i>Escherichia</i>                                  | 35    | 504.94      | 230.46       | 227.15        | 484.00        | 10.57       | 1.20         | 1.18          | 11            |
| <i>Clostridioides difficile</i>                     | 25    | 429.44      | 236.08       | 231.31        | 386.00        | 11.04       | 1.06         | 1.04          | 11            |
| <i>Enterococcus faecium</i>                         | 15    | 447.93      | 198.94       | 192.20        | 424.00        | 10.93       | 1.94         | 1.88          | 10            |
| <i>[Clostridium]</i> <i>innocuum</i>                | 9     | 422.44      | 164.43       | 155.03        | 373.00        | 11.11       | 1.62         | 1.52          | 11            |
| <i>Escherichia fergusonii</i>                       | 9     | 587.33      | 368.29       | 347.22        | 396.00        | 10.67       | 1.50         | 1.41          | 11            |
| <i>Escherichia albertii</i>                         | 7     | 370.71      | 202.41       | 187.40        | 272.00        | 9.86        | 1.21         | 1.12          | 9             |
| <i>Shigella flexneri</i>                            | 7     | 566.71      | 293.55       | 271.78        | 502.00        | 10.43       | 1.13         | 1.05          | 11            |

|                                       |       |             |              |               |               |             |              |               |               |
|---------------------------------------|-------|-------------|--------------|---------------|---------------|-------------|--------------|---------------|---------------|
| <b>Stool2_R2: Beneficial Bacteria</b> |       |             |              |               |               |             |              |               |               |
|                                       | reads | seqlen_mean | seqlen_stdev | seqlen_pstdev | seqlen_median | qscore_mean | qscore_stdev | qscore_pstdev | qscore_median |
| <i>Bifidobacterium adolescentis</i>   | 1618  | 716.99      | 508.65       | 508.49        | 556.00        | 10.37       | 1.16         | 1.16          | 10            |
| <i>Akkermansia muciniphila</i>        | 1488  | 701.04      | 483.62       | 483.46        | 556.00        | 10.29       | 1.17         | 1.17          | 10            |
| <i>Bifidobacterium longum</i>         | 453   | 671.97      | 460.27       | 459.76        | 498.00        | 10.42       | 1.23         | 1.22          | 10            |
| <i>Bacteroides ovatus</i>             | 314   | 608.07      | 446.84       | 446.13        | 448.00        | 10.62       | 1.40         | 1.39          | 10            |

|                                              |       |             |              |               |               |             |              |               |               |
|----------------------------------------------|-------|-------------|--------------|---------------|---------------|-------------|--------------|---------------|---------------|
| <i>Bacteroides uniformis</i>                 | 295   | 703.01      | 461.31       | 460.52        | 529.00        | 10.58       | 1.28         | 1.28          | 10            |
| <i>Bifidobacterium pseudocatenulatum</i>     | 222   | 760.96      | 551.05       | 549.81        | 571.00        | 10.48       | 1.23         | 1.23          | 10            |
| <i>Bacteroides fragilis</i>                  | 217   | 655.82      | 476.09       | 474.99        | 462.00        | 10.56       | 1.33         | 1.33          | 10            |
| <i>Odoribacter splanchnicus</i>              | 149   | 602.55      | 458.56       | 457.02        | 441.00        | 10.69       | 1.34         | 1.34          | 11            |
| <i>Collinsella aerofaciens</i>               | 141   | 669.09      | 435.97       | 434.42        | 536.00        | 10.29       | 1.19         | 1.18          | 10            |
| <i>Bacteroides thetaiotaomicron</i>          | 134   | 640.90      | 430.60       | 428.99        | 467.00        | 10.65       | 1.31         | 1.30          | 11            |
| <b>Stool2_R2: Commensal Bacteria</b>         |       |             |              |               |               |             |              |               |               |
|                                              | reads | seqlen_mean | seqlen_stdev | seqlen_pstdev | seqlen_median | qscore_mean | qscore_stdev | qscore_pstdev | qscore_median |
| <i>Megamonas funiformis</i>                  | 5585  | 575.21      | 408.21       | 408.17        | 431.00        | 10.81       | 1.52         | 1.52          | 11            |
| <i>Phocaeicola dorei</i>                     | 1057  | 599.10      | 413.97       | 413.77        | 463.00        | 10.64       | 1.38         | 1.38          | 10            |
| <i>Anaerobutyricum hallii</i>                | 728   | 574.80      | 451.33       | 451.02        | 427.00        | 10.75       | 1.38         | 1.38          | 11            |
| <i>Escherichia coli</i>                      | 527   | 735.91      | 516.82       | 516.33        | 578.00        | 10.47       | 1.24         | 1.24          | 10            |
| <i>Blautia sp. SC05B48</i>                   | 442   | 614.80      | 509.33       | 508.75        | 454.00        | 10.60       | 1.36         | 1.36          | 10            |
| <i>Anaerostipes hadrus</i>                   | 428   | 546.94      | 376.15       | 375.71        | 416.00        | 10.80       | 1.48         | 1.48          | 11            |
| <i>Bacteroides</i>                           | 391   | 568.01      | 438.39       | 437.83        | 428.00        | 10.53       | 1.35         | 1.35          | 10            |
| <i>Alistipes dispar</i>                      | 369   | 693.61      | 458.29       | 457.67        | 567.00        | 10.51       | 1.23         | 1.23          | 10            |
| <i>Parabacteroides distasonis</i>            | 290   | 649.74      | 522.10       | 521.20        | 467.50        | 10.49       | 1.14         | 1.13          | 10            |
| <i>Phocaeicola vulgatus</i>                  | 219   | 574.89      | 369.38       | 368.54        | 429.00        | 10.54       | 1.39         | 1.39          | 10            |
| <b>Stool2_R2: Harmful Bacteria</b>           |       |             |              |               |               |             |              |               |               |
|                                              | reads | seqlen_mean | seqlen_stdev | seqlen_pstdev | seqlen_median | qscore_mean | qscore_stdev | qscore_pstdev | qscore_median |
| <i>Desulfovibrio piger</i>                   | 400   | 753.98      | 556.40       | 555.71        | 596.50        | 10.37       | 1.16         | 1.16          | 10            |
| <i>Alistipes onderdonkii subsp. vulgaris</i> | 121   | 671.40      | 485.84       | 483.83        | 575.00        | 10.40       | 1.17         | 1.16          | 10            |
| <i>Roseburia hominis</i>                     | 70    | 660.54      | 488.84       | 485.34        | 539.00        | 10.70       | 1.30         | 1.29          | 11            |
| <i>Clostridioides difficile</i>              | 45    | 558.36      | 349.05       | 345.15        | 416.00        | 10.33       | 1.45         | 1.43          | 10            |
| <i>Escherichia</i>                           | 38    | 601.13      | 431.03       | 425.32        | 430.50        | 10.55       | 1.27         | 1.25          | 10.5          |
| <i>Escherichia fergusonii</i>                | 14    | 713.86      | 413.06       | 398.04        | 654.50        | 10.07       | 1.21         | 1.16          | 10            |
| <i>Eggerthella lenta</i>                     | 13    | 706.00      | 581.62       | 558.80        | 587.00        | 10.85       | 1.28         | 1.23          | 11            |
| <i>[Clostridium] innocuum</i>                | 12    | 436.08      | 170.39       | 163.13        | 401.00        | 10.58       | 1.16         | 1.11          | 10.5          |
| <i>Enterococcus faecium</i>                  | 12    | 761.25      | 492.94       | 471.95        | 655.00        | 10.67       | 0.78         | 0.75          | 11            |
| <i>Escherichia albertii</i>                  | 8     | 620.88      | 375.32       | 351.08        | 439.50        | 10.38       | 1.30         | 1.22          | 10            |



**Table S5.** Microbiome assessment by human expert for each replicate.  
(refer to Excel files)

**Table S6.** EPI2ME analysis of antimicrobial resistance. The alignment column shows the number of reads aligned to the known antimicrobial resistance genes.

| Saliva1_R1                                                                                       |            |                      |                                      |                       |                                                                                                               |                          |                |                      |
|--------------------------------------------------------------------------------------------------|------------|----------------------|--------------------------------------|-----------------------|---------------------------------------------------------------------------------------------------------------|--------------------------|----------------|----------------------|
| Gene                                                                                             | Alignments | Average Accuracy (%) | Taxon                                | CARD Model            | CARD category                                                                                                 | Gene length (base pairs) | Covered length | Gene coverage (100%) |
| Pasteurella multocida 16S rRNA mutation conferring resistance to spectinomycin                   | 12         | 86.8                 | Pasteurella multocida 36950          | rRNA mutation model   | aminoglycoside resistance gene, antibiotic resistant gene variant or mutant                                   | 1,551                    | 1,551          | 100.0                |
| Neisseria meningitidis 16S rRNA mutation conferring resistance to spectinomycin                  | 5          | 89.5                 | Neisseria meningitidis               | rRNA mutation model   | aminoglycoside resistance gene, antibiotic resistant gene variant or mutant                                   | 1544                     | 1544           | 100.0                |
| RlmA(II)                                                                                         | 2          | 80.1                 | Streptococcus pneumoniae             | protein homolog model | macrolide resistance gene, gene involved in self resistance to antibiotic, antibiotic target modifying enzyme | 849                      | 842            | 99.2                 |
| Haemophilus parainfluenzae gyrA conferring resistance to fluoroquinolones                        | 2          | 90.7                 | Haemophilus parainfluenzae           | protein variant model | fluoroquinolone resistance gene, antibiotic resistant gene variant or mutant                                  | 2646                     | 2646           | 100.0                |
| Haemophilus parainfluenzae parC conferring resistance to fluoroquinolones                        | 2          | 90.3                 | Haemophilus parainfluenzae           | protein variant model | fluoroquinolone resistance gene, antibiotic resistant gene variant or mutant                                  | 2256                     | 1858           | 82.4                 |
| Neisseria gonorrhoeae parC conferring resistance to fluoroquinolone                              | 2          | 93.5                 | Neisseria gonorrhoeae FA 1090        | protein variant model | fluoroquinolone resistance gene, antibiotic resistant gene variant or mutant                                  | 2304                     | 428            | 18.6                 |
| Mycobacterium smegmatis 16S rRNA mutation in the rrsB gene conferring resistance to hygromycin B | 2          | 74.5                 | Mycobacterium smegmatis str. MC2 155 | rRNA mutation model   | aminoglycoside resistance gene, antibiotic resistant gene variant or mutant                                   | 1528                     | 1528           | 100.0                |
| Mycobacterium tuberculosis 16S rRNA mutation conferring resistance to viomycin                   | 2          | 80                   | Mycobacterium tuberculosis H37Rv     | rRNA mutation model   | antibiotic resistant gene variant or mutant, peptide antibiotic resistance gene                               | 1537                     | 558            | 36.3                 |
| Neisseria gonorrhoeae 16S rRNA mutation conferring resistance to spectinomycin                   | 2          | 86.1                 | Neisseria gonorrhoeae                | rRNA mutation model   | aminoglycoside resistance gene, antibiotic resistant gene variant or mutant                                   | 1545                     | 226            | 14.6                 |
| Mycobacterium smegmatis 16S rRNA mutation in the rrsA gene conferring resistance to hygromycin B | 2          | 79.6                 | Mycobacterium smegmatis str. MC2 155 | rRNA mutation model   | aminoglycoside resistance gene, antibiotic resistant gene variant or mutant                                   | 1528                     | 1246           | 81.5                 |
| Mycobacterium smegmatis 16S rRNA mutation in the rrsB gene conferring resistance to              | 2          | 80                   | Mycobacterium smegmatis str. MC2 155 | rRNA mutation model   | aminoglycoside resistance gene, antibiotic resistant gene variant or mutant                                   | 1528                     | 1265           | 82.8                 |

|                                                                                       |   |      |                                             |                       |                                                                                                                           |      |      |       |
|---------------------------------------------------------------------------------------|---|------|---------------------------------------------|-----------------------|---------------------------------------------------------------------------------------------------------------------------|------|------|-------|
| neomycin                                                                              |   |      |                                             |                       |                                                                                                                           |      |      |       |
| ErmB                                                                                  | 1 | 90.2 | Enterococcus faecium                        | protein homolog model | antibiotic target modifying enzyme, macrolide resistance gene, streptogramin resistance gene, lincosamide resistance gene | 748  | 387  | 51.7  |
| mtrE                                                                                  | 1 | 74.2 | Neisseria gonorrhoeae                       | protein homolog model | gene modulating antibiotic efflux, efflux pump conferring antibiotic resistance                                           | 1405 | 875  | 62.3  |
| mel                                                                                   | 1 | 85.9 | Streptococcus pneumoniae Taiwan19F-14       | protein homolog model | efflux pump conferring antibiotic resistance                                                                              | 1465 | 379  | 25.9  |
| tetM                                                                                  | 1 | 85.7 | Clostridium difficile 630                   | protein homolog model | tetracycline resistance gene, antibiotic target protection protein                                                        | 1921 | 1821 | 94.8  |
| catS                                                                                  | 1 | 89   | Streptococcus pyogenes                      | protein homolog model | antibiotic inactivation enzyme, chloramphenicol resistance gene                                                           | 492  | 492  | 100.0 |
| tetQ                                                                                  | 1 | 86.7 | Bacteroides fragilis                        | protein homolog model | tetracycline resistance gene, antibiotic target protection protein                                                        | 1974 | 1974 | 100.0 |
| Neisseria gonorrhoeae gyrA conferring resistance to fluoroquinolones                  | 1 | 81.1 | Neisseria gonorrhoeae FA 1090               | protein variant model | fluoroquinolone resistance gene, antibiotic resistant gene variant or mutant                                              | 2751 | 2694 | 97.9  |
| Staphylococcus aureus rpoC conferring resistance to daptomycin                        | 1 | 66.1 | Staphylococcus aureus subsp. aureus MRSA252 | protein variant model | lipopeptide antibiotic resistance gene, antibiotic resistant gene variant or mutant                                       | 3625 | 918  | 25.3  |
| Escherichia coli EF-Tu mutants conferring resistance to kirromycin                    | 1 | 84.1 | Escherichia coli                            | protein variant model | elfamycin resistance gene, antibiotic resistant gene variant or mutant                                                    | 1185 | 436  | 36.8  |
| rpsJ                                                                                  | 1 | 86.9 | Neisseria gonorrhoeae FA 1090               | protein variant model | tetracycline resistance gene, antibiotic target protection protein                                                        | 312  | 311  | 99.7  |
| Escherichia coli 16S rRNA mutation in the rrsB gene conferring resistance to neomycin | 1 | 75.5 | Escherichia coli K-12                       | rRNA mutation model   | aminoglycoside resistance gene, antibiotic resistant gene variant or mutant                                               | 1542 | 526  | 34.1  |
| Chlamydomphila psittaci 16S rRNA mutation conferring resistance to spectinomycin      | 1 | 74.8 | Chlamydia psittaci 6BC                      | rRNA mutation model   | aminoglycoside resistance gene, antibiotic resistant gene variant or mutant                                               | 1507 | 562  | 37.3  |
| Propionibacterium acnes 16S rRNA mutation conferring resistance to tetracycline       | 1 | 82.7 | Propionibacterium acnes                     | rRNA mutation model   | tetracycline resistance gene, antibiotic resistant gene variant or mutant                                                 | 1486 | 371  | 25.0  |
| Mycobacterium abscessus 16S rRNA mutation conferring                                  | 1 | 77.8 | Mycobacterium abscessus                     | rRNA mutation model   | aminoglycoside resistance gene, antibiotic resistant gene variant or mutant                                               | 1504 | 742  | 49.3  |

|                        |  |  |  |  |  |  |  |  |
|------------------------|--|--|--|--|--|--|--|--|
| resistance to amikacin |  |  |  |  |  |  |  |  |
|------------------------|--|--|--|--|--|--|--|--|

### Saliva1\_R2

| Gene                                                                                                              | Alignments | Average Accuracy (%) | Taxon                                       | CARD Model            | CARD category                                                                       | Gene length (base pairs) | Covered length | Gene coverage (100%) |
|-------------------------------------------------------------------------------------------------------------------|------------|----------------------|---------------------------------------------|-----------------------|-------------------------------------------------------------------------------------|--------------------------|----------------|----------------------|
| Escherichia coli EF-Tu mutants conferring resistance to Pulvomycin                                                | 3          | 77.1                 | Escherichia coli CFT073                     | protein variant model | elfamycin resistance gene, antibiotic resistant gene variant or mutant              | 1230                     | 1172           | 95.3                 |
| Neisseria meningitidis 16S rRNA mutation conferring resistance to spectinomycin                                   | 3          | 87.9                 | Neisseria meningitidis                      | rRNA mutation model   | aminoglycoside resistance gene, antibiotic resistant gene variant or mutant         | 1544                     | 1544           | 100.0                |
| Salmonella enterica serovar Typhimurium 16S rRNA mutation in the rrsD gene conferring resistance to spectinomycin | 2          | 72.1                 | Salmonella enterica subsp. salamae          | rRNA mutation model   | aminoglycoside resistance gene, antibiotic resistant gene variant or mutant         | 1544                     | 1156           | 74.9                 |
| Bifidobacteria intrinsic ileS conferring resistance to mupirocin                                                  | 1          | 70.4                 | Bifidobacterium bifidum PRL2010             | protein homolog model | mupirocin resistance gene                                                           | 3324                     | 1993           | 60.0                 |
| Staphylococcus aureus rpoC conferring resistance to daptomycin                                                    | 1          | 79.9                 | Staphylococcus aureus subsp. aureus MRSA252 | protein variant model | lipopeptide antibiotic resistance gene, antibiotic resistant gene variant or mutant | 3625                     | 190            | 5.2                  |
| Haemophilus parainfluenzae gyrA conferring resistance to fluoroquinolones                                         | 1          | 88.3                 | Haemophilus parainfluenzae                  | protein variant model | fluoroquinolone resistance gene, antibiotic resistant gene variant or mutant        | 2646                     | 2646           | 100.0                |
| Neisseria gonorrhoeae parC conferring resistance to fluoroquinolone                                               | 1          | 82.6                 | Neisseria gonorrhoeae FA 1090               | protein variant model | fluoroquinolone resistance gene, antibiotic resistant gene variant or mutant        | 2304                     | 1967           | 85.4                 |
| Escherichia coli 16S rRNA mutation in the rrnB gene conferring resistance to streptomycin                         | 1          | 75                   | Escherichia coli K-12                       | rRNA mutation model   | aminoglycoside resistance gene, antibiotic resistant gene variant or mutant         | 1542                     | 882            | 57.2                 |
| Pasteurella multocida 16S rRNA mutation conferring resistance to spectinomycin                                    | 1          | 83.5                 | Pasteurella multocida 36950                 | rRNA mutation model   | aminoglycoside resistance gene, antibiotic resistant gene variant or mutant         | 1551                     | 1551           | 100.0                |

### Saliva2\_R1

| Gene                                                                                                              | Alignments | Average Accuracy (%) | Taxon                                       | CARD Model            | CARD category                                                                                                                | Gene length (base pairs) | Covered length | Gene coverage (100%) |
|-------------------------------------------------------------------------------------------------------------------|------------|----------------------|---------------------------------------------|-----------------------|------------------------------------------------------------------------------------------------------------------------------|--------------------------|----------------|----------------------|
| Pasteurella multocida 16S rRNA mutation conferring resistance to spectinomycin                                    | 106        | 88.6                 | Pasteurella multocida 36950                 | rRNA mutation model   | aminoglycoside resistance gene, antibiotic resistant gene variant or mutant                                                  | 1551                     | 1551           | 100.0                |
| Haemophilus parainfluenzae parC conferring resistance to fluoroquinolones                                         | 30         | 89.1                 | Haemophilus parainfluenzae                  | protein variant model | fluoroquinolone resistance gene, antibiotic resistant gene variant or mutant                                                 | 2256                     | 2256           | 100.0                |
| Haemophilus parainfluenzae gyrA conferring resistance to fluoroquinolones                                         | 29         | 92.2                 | Haemophilus parainfluenzae                  | protein variant model | fluoroquinolone resistance gene, antibiotic resistant gene variant or mutant                                                 | 2646                     | 2646           | 100.0                |
| Neisseria meningitidis 16S rRNA mutation conferring resistance to spectinomycin                                   | 20         | 84.4                 | Neisseria meningitidis                      | rRNA mutation model   | aminoglycoside resistance gene, antibiotic resistant gene variant or mutant                                                  | 1544                     | 1544           | 100.0                |
| Streptococcus pneumoniae parC conferring resistance to fluoroquinolone                                            | 18         | 86.2                 | Streptococcus pneumoniae TIGR4              | protein variant model | fluoroquinolone resistance gene, antibiotic resistant gene variant or mutant, gene involved in self resistance to antibiotic | 2473                     | 2453           | 99.2                 |
| tetQ                                                                                                              | 17         | 93.7                 | Bacteroides fragilis                        | protein homolog model | tetracycline resistance gene, antibiotic target protection protein                                                           | 1974                     | 1974           | 100.0                |
| Enterococcus faecium EF-Tu mutants conferring resistance to GE2270A                                               | 11         | 76.8                 | Enterococcus faecium DO                     | protein variant model | elfamycin resistance gene, antibiotic resistant gene variant or mutant                                                       | 1272                     | 1224           | 96.2                 |
| Salmonella enterica serovar Typhimurium 16S rRNA mutation in the rrsD gene conferring resistance to spectinomycin | 11         | 84.6                 | Salmonella enterica subsp. salamae          | rRNA mutation model   | aminoglycoside resistance gene, antibiotic resistant gene variant or mutant                                                  | 1544                     | 1544           | 100.0                |
| RlmA(II)                                                                                                          | 10         | 87                   | Streptococcus pneumoniae                    | protein homolog model | macrolide resistance gene, gene involved in self resistance to antibiotic, antibiotic target modifying enzyme                | 849                      | 842            | 99.2                 |
| Escherichia coli rpoB mutants conferring resistance to rifampicin                                                 | 10         | 73.5                 | Escherichia coli O157:H7 str. Sakai         | protein variant model | antibiotic resistant gene variant or mutant, rifampin resistance gene                                                        | 4030                     | 3696           | 91.7                 |
| Staphylococcus aureus rpoC conferring resistance to daptomycin                                                    | 9          | 77                   | Staphylococcus aureus subsp. aureus MRSA252 | protein variant model | lipopeptide antibiotic resistance gene, antibiotic resistant gene variant or mutant                                          | 3625                     | 1759           | 48.5                 |
| Helicobacter pylori 16S rRNA mutation conferring resistance to tetracycline                                       | 9          | 78                   | Helicobacter pylori 26695                   | rRNA mutation model   | tetracycline resistance gene, antibiotic resistant gene variant or mutant                                                    | 1501                     | 1497           | 99.7                 |
| mefA                                                                                                              | 8          | 90.6                 | Exiguobacterium sp.                         | protein homolog       | efflux pump conferring antibiotic resistance                                                                                 | 1219                     | 923            | 75.7                 |

|                                                                                                  |   |      |                                           |                       |                                                                              |      |      |       |
|--------------------------------------------------------------------------------------------------|---|------|-------------------------------------------|-----------------------|------------------------------------------------------------------------------|------|------|-------|
|                                                                                                  |   |      | S3-2                                      | model                 |                                                                              |      |      |       |
| tetM                                                                                             | 8 | 86.7 | Clostridium difficile 630                 | protein homolog model | tetracycline resistance gene, antibiotic target protection protein           | 1921 | 1889 | 98.3  |
| Neisseria gonorrhoeae 16S rRNA mutation conferring resistance to spectinomycin                   | 8 | 83.3 | Neisseria gonorrhoeae                     | rRNA mutation model   | aminoglycoside resistance gene, antibiotic resistant gene variant or mutant  | 1545 | 819  | 53.0  |
| CfxA2                                                                                            | 7 | 94.7 | Prevotella intermedia                     | protein homolog model | beta-lactam resistance gene, antibiotic inactivation enzyme                  | 967  | 967  | 100.0 |
| Neisseria gonorrhoeae parC conferring resistance to fluoroquinolone                              | 7 | 89.4 | Neisseria gonorrhoeae FA 1090             | protein variant model | fluoroquinolone resistance gene, antibiotic resistant gene variant or mutant | 2304 | 1724 | 74.8  |
| patB                                                                                             | 6 | 87.1 | Streptococcus pneumoniae R6               | protein homolog model | efflux pump conferring antibiotic resistance                                 | 1167 | 973  | 83.4  |
| mel                                                                                              | 6 | 94.2 | Streptococcus pneumoniae Taiwan19F-14     | protein homolog model | efflux pump conferring antibiotic resistance                                 | 1465 | 1166 | 79.6  |
| Escherichia coli EF-Tu mutants conferring resistance to Enacyloxin IIa                           | 6 | 81.7 | Escherichia coli str. K-12 substr. MG1655 | protein variant model | elfamycin resistance gene, antibiotic resistant gene variant or mutant       | 1185 | 1175 | 99.2  |
| Mycobacterium smegmatis 16S rRNA mutation in the rrsB gene conferring resistance to hygromycin B | 6 | 84.2 | Mycobacterium smegmatis str. MC2 155      | rRNA mutation model   | aminoglycoside resistance gene, antibiotic resistant gene variant or mutant  | 1528 | 1528 | 100.0 |
| Mycobacterium smegmatis 16S rRNA mutation in the rrsB gene conferring resistance to streptomycin | 5 | 81   | Mycobacterium smegmatis str. MC2 155      | rRNA mutation model   | aminoglycoside resistance gene, antibiotic resistant gene variant or mutant  | 1528 | 1520 | 99.5  |
| hmrM                                                                                             | 4 | 86.3 | Haemophilus influenzae                    | protein homolog model | efflux pump conferring antibiotic resistance                                 | 1395 | 1333 | 95.6  |
| CfxA5                                                                                            | 4 | 89.8 | Parabacteroides distasonis                | protein homolog model | beta-lactam resistance gene, antibiotic inactivation enzyme                  | 967  | 914  | 94.5  |
| CfxA3                                                                                            | 4 | 97.6 | Capnocytophaga ochracea                   | protein homolog model | beta-lactam resistance gene, antibiotic inactivation enzyme                  | 967  | 489  | 50.6  |
| IsaC                                                                                             | 4 | 89.2 | Streptococcus agalactiae                  | protein homolog model | efflux pump conferring antibiotic resistance                                 | 1480 | 1124 | 75.9  |
| Neisseria gonorrhoeae gyrA conferring resistance to fluoroquinolones                             | 4 | 87.2 | Neisseria gonorrhoeae FA 1090             | protein variant model | fluoroquinolone resistance gene, antibiotic resistant gene variant or mutant | 2751 | 1095 | 39.8  |
| Escherichia coli EF-Tu mutants conferring resistance to                                          | 4 | 83.2 | Escherichia coli CFT073                   | protein variant model | elfamycin resistance gene, antibiotic resistant gene variant or mutant       | 1230 | 1149 | 93.4  |

|                                                                                              |   |      |                                      |                       |                                                                                 |      |      |      |
|----------------------------------------------------------------------------------------------|---|------|--------------------------------------|-----------------------|---------------------------------------------------------------------------------|------|------|------|
| Pulvomycin                                                                                   |   |      |                                      |                       |                                                                                 |      |      |      |
| Escherichia coli 16S rRNA mutation in the rrnB gene conferring resistance to spectinomycin   | 4 | 79.1 | Escherichia coli K-12                | rRNA mutation model   | aminoglycoside resistance gene, antibiotic resistant gene variant or mutant     | 1542 | 715  | 46.4 |
| Mycobacterium smegmatis 16S rRNA mutation in the rrsA gene conferring resistance to neomycin | 4 | 82.1 | Mycobacterium smegmatis str. MC2 155 | rRNA mutation model   | aminoglycoside resistance gene, antibiotic resistant gene variant or mutant     | 1528 | 806  | 52.7 |
| Mycobacterium smegmatis 16S rRNA mutation in the rrsA gene conferring resistance to viomycin | 4 | 78   | Mycobacterium smegmatis str. MC2 155 | rRNA mutation model   | antibiotic resistant gene variant or mutant, peptide antibiotic resistance gene | 1528 | 1283 | 84.0 |
| Mycobacterium smegmatis 16S rRNA mutation in the rrsB gene conferring resistance to neomycin | 4 | 83.2 | Mycobacterium smegmatis str. MC2 155 | rRNA mutation model   | aminoglycoside resistance gene, antibiotic resistant gene variant or mutant     | 1528 | 1211 | 79.3 |
| tetW                                                                                         | 3 | 93.1 | Bifidobacterium longum               | protein homolog model | tetracycline resistance gene, antibiotic target protection protein              | 1920 | 971  | 50.6 |
| pmrA efflux pump                                                                             | 3 | 89.8 | Streptococcus pneumoniae R6          | protein homolog model | efflux pump conferring antibiotic resistance                                    | 1220 | 876  | 71.8 |
| CfxA4                                                                                        | 3 | 91.8 | Bacteroides fragilis                 | protein homolog model | beta-lactam resistance gene, antibiotic inactivation enzyme                     | 967  | 788  | 81.5 |
| PBP2x                                                                                        | 3 | 83.6 | Streptococcus pneumoniae             | protein variant model | beta-lactam resistance gene, antibiotic resistant gene variant or mutant        | 2253 | 2091 | 92.8 |
| Mycobacterium tuberculosis 16S rRNA mutation conferring resistance to streptomycin           | 3 | 87.3 | Mycobacterium tuberculosis H37Rv     | rRNA mutation model   | aminoglycoside resistance gene, antibiotic resistant gene variant or mutant     | 1537 | 679  | 44.2 |
| Mycobacterium tuberculosis 16S rRNA mutation conferring resistance to viomycin               | 3 | 75.1 | Mycobacterium tuberculosis H37Rv     | rRNA mutation model   | antibiotic resistant gene variant or mutant, peptide antibiotic resistance gene | 1537 | 1528 | 99.4 |
| Mycobacterium tuberculosis 16S rRNA mutation conferring resistance to amikacin               | 3 | 75.1 | Mycobacterium tuberculosis H37Rv     | rRNA mutation model   | aminoglycoside resistance gene, antibiotic resistant gene variant or mutant     | 1537 | 1533 | 99.7 |
| Escherichia coli 16S rRNA mutation in the rrsB gene conferring resistance to gentamicin C    | 3 | 89.8 | Escherichia coli K-12                | rRNA mutation model   | aminoglycoside resistance gene, antibiotic resistant gene variant or mutant     | 1542 | 495  | 32.1 |
| Propionibacterium acnes 16S rRNA mutation conferring resistance to tetracycline              | 3 | 79.2 | Propionibacterium acnes              | rRNA mutation model   | tetracycline resistance gene, antibiotic resistant gene variant or mutant       | 1486 | 1400 | 94.2 |

|                                                                                                 |   |      |                                             |                       |                                                                                 |      |      |      |
|-------------------------------------------------------------------------------------------------|---|------|---------------------------------------------|-----------------------|---------------------------------------------------------------------------------|------|------|------|
| Mycobacterium abscessus 16S rRNA mutation conferring resistance to amikacin                     | 3 | 76.8 | Mycobacterium abscessus                     | rRNA mutation model   | aminoglycoside resistance gene, antibiotic resistant gene variant or mutant     | 1504 | 1062 | 70.6 |
| Escherichia coli 16S rRNA mutation in the rrsB gene conferring resistance to tobramycin         | 3 | 77.7 | Escherichia coli K-12                       | rRNA mutation model   | aminoglycoside resistance gene, antibiotic resistant gene variant or mutant     | 1542 | 1175 | 76.2 |
| Mycobacterium abscessus 16S rRNA mutation conferring resistance to tobramycin                   | 3 | 83.7 | Mycobacterium abscessus                     | rRNA mutation model   | aminoglycoside resistance gene, antibiotic resistant gene variant or mutant     | 1504 | 886  | 58.9 |
| Mycobacterium smegmatis 16S rRNA mutation in the rrsB gene conferring resistance to kanamycin A | 3 | 81.1 | Mycobacterium smegmatis str. MC2 155        | rRNA mutation model   | aminoglycoside resistance gene, antibiotic resistant gene variant or mutant     | 1528 | 749  | 49.0 |
| Escherichia coli 16S rRNA mutation in the rrsB gene conferring resistance to paromomycin        | 3 | 76.8 | Escherichia coli K-12                       | rRNA mutation model   | aminoglycoside resistance gene, antibiotic resistant gene variant or mutant     | 1542 | 1093 | 70.9 |
| macB                                                                                            | 2 | 83.1 | Neisseria gonorrhoeae                       | protein homolog model | efflux pump conferring antibiotic resistance                                    | 1935 | 509  | 26.3 |
| catS                                                                                            | 2 | 91.5 | Streptococcus pyogenes                      | protein homolog model | antibiotic inactivation enzyme, chloramphenicol resistance gene                 | 492  | 277  | 56.3 |
| mtrD                                                                                            | 2 | 81.7 | Neisseria meningitidis MC58                 | protein homolog model | gene modulating antibiotic efflux, efflux pump conferring antibiotic resistance | 3205 | 3178 | 99.2 |
| PBP2b                                                                                           | 2 | 85.4 | Streptococcus pneumoniae R6                 | protein variant model | beta-lactam resistance gene, antibiotic resistant gene variant or mutant        | 2058 | 502  | 24.4 |
| PBP1a                                                                                           | 2 | 74.9 | Streptococcus pneumoniae                    | protein variant model | beta-lactam resistance gene, antibiotic resistant gene variant or mutant        | 2160 | 1257 | 58.2 |
| Staphylococcus aureus rpoB mutants conferring resistance to rifampicin                          | 2 | 77.8 | Staphylococcus aureus subsp. aureus MRSA252 | protein variant model | antibiotic resistant gene variant or mutant, rifampin resistance gene           | 3553 | 817  | 23.0 |
| Escherichia coli 16S rRNA mutation in the rrsB gene conferring resistance to neomycin           | 2 | 81.9 | Escherichia coli K-12                       | rRNA mutation model   | aminoglycoside resistance gene, antibiotic resistant gene variant or mutant     | 1542 | 564  | 36.6 |
| Escherichia coli 16S rRNA mutation in the rrsB gene conferring resistance to G418               | 2 | 74.5 | Escherichia coli K-12                       | rRNA mutation model   | aminoglycoside resistance gene, antibiotic resistant gene variant or mutant     | 1542 | 552  | 35.8 |
| Mycobacterium abscessus 16S rRNA mutation conferring resistance to neomycin                     | 2 | 78.2 | Mycobacterium abscessus                     | rRNA mutation model   | aminoglycoside resistance gene, antibiotic resistant gene variant or mutant     | 1504 | 771  | 51.3 |



|                                                                                                  |   |      |                                      |                       |                                                                                                                            |      |     |      |
|--------------------------------------------------------------------------------------------------|---|------|--------------------------------------|-----------------------|----------------------------------------------------------------------------------------------------------------------------|------|-----|------|
| Escherichia coli 16S rRNA mutation in the rrsH gene conferring resistance to spectinomycin       | 2 | 85   | Escherichia coli K-12                | rRNA mutation model   | aminoglycoside resistance gene, antibiotic resistant gene variant or mutant                                                | 1542 | 893 | 57.9 |
| Mycobacterium smegmatis 16S rRNA mutation in the rrsA gene conferring resistance to hygromycin B | 2 | 88.6 | Mycobacterium smegmatis str. MC2 155 | rRNA mutation model   | aminoglycoside resistance gene, antibiotic resistant gene variant or mutant                                                | 1528 | 465 | 30.4 |
| Escherichia coli 16S rRNA mutation in the rrsB gene conferring resistance to spectinomycin       | 2 | 85.6 | Escherichia coli K-12                | rRNA mutation model   | aminoglycoside resistance gene, antibiotic resistant gene variant or mutant                                                | 1542 | 393 | 25.5 |
| Escherichia coli 16S rRNA mutation in the rrsC gene conferring resistance to kasugamicin         | 2 | 78.3 | Escherichia coli K-12                | rRNA mutation model   | aminoglycoside resistance gene, antibiotic resistant gene variant or mutant                                                | 1542 | 453 | 29.4 |
| Mycobacterium smegmatis 16S rRNA mutation in the rrsB gene conferring resistance to viomycin     | 2 | 91.9 | Mycobacterium smegmatis str. MC2 155 | rRNA mutation model   | antibiotic resistant gene variant or mutant, peptide antibiotic resistance gene                                            | 1528 | 609 | 39.9 |
| Mycobacterium tuberculosis 16S rRNA mutation conferring resistance to kanamycin                  | 2 | 78.1 | Mycobacterium tuberculosis H37Rv     | rRNA mutation model   | aminoglycoside resistance gene, antibiotic resistant gene variant or mutant                                                | 1537 | 817 | 53.2 |
| Streptomyces cinnamoneus EF-Tu mutants conferring resistance to elfamycin                        | 1 | 74.2 | Streptomyces cinnamoneus             | protein homolog model | elfamycin resistance gene, antibiotic resistant gene variant or mutant, gene involved in self resistance to antibiotic     | 1194 | 232 | 19.4 |
| lnuC                                                                                             | 1 | 97.3 | Streptococcus agalactiae             | protein homolog model | antibiotic inactivation enzyme, lincosamide resistance gene                                                                | 495  | 294 | 59.4 |
| Bifidobacteria intrinsic ileS conferring resistance to mupirocin                                 | 1 | 76.5 | Bifidobacterium bifidum PRL2010      | protein homolog model | mupirocin resistance gene                                                                                                  | 3324 | 611 | 18.4 |
| macA                                                                                             | 1 | 80.2 | Neisseria gonorrhoeae                | protein homolog model | efflux pump conferring antibiotic resistance                                                                               | 1179 | 496 | 42.1 |
| TEM-4                                                                                            | 1 | 94   | Klebsiella pneumoniae                | protein homolog model | beta-lactam resistance gene, antibiotic inactivation enzyme                                                                | 1061 | 580 | 54.7 |
| Streptomyces rishiriensis parY mutant conferring resistance to aminocoumarin                     | 1 | 76   | Streptomyces rishiriensis            | protein homolog model | gene involved in self resistance to antibiotic, antibiotic resistant gene variant or mutant, aminocoumarin resistance gene | 2112 | 365 | 17.3 |
| CfxA                                                                                             | 1 | 92.7 | Bacteroides vulgatus                 | protein homolog model | beta-lactam resistance gene, antibiotic inactivation enzyme                                                                | 967  | 180 | 18.6 |
| cat-TC                                                                                           | 1 | 96.1 | Lactobacillus reuteri                | protein homolog       | antibiotic inactivation enzyme,                                                                                            | 717  | 76  | 10.6 |

|                                                                                                 |   |      |                                      |                       |                                                                             |      |     |      |
|-------------------------------------------------------------------------------------------------|---|------|--------------------------------------|-----------------------|-----------------------------------------------------------------------------|------|-----|------|
|                                                                                                 |   |      |                                      | model                 | chloramphenicol resistance gene                                             |      |     |      |
| mtrR                                                                                            | 1 | 76.7 | Neisseria gonorrhoeae NCCP11945      | protein homolog model | gene modulating antibiotic efflux                                           | 634  | 366 | 57.7 |
| Escherichia coli EF-Tu mutants conferring resistance to kirromycin                              | 1 | 86.3 | Escherichia coli                     | protein variant model | elfamycin resistance gene, antibiotic resistant gene variant or mutant      | 1185 | 162 | 13.7 |
| Escherichia coli 16S rRNA mutation in the rrnB gene conferring resistance to streptomycin       | 1 | 94.4 | Escherichia coli K-12                | rRNA mutation model   | aminoglycoside resistance gene, antibiotic resistant gene variant or mutant | 1542 | 56  | 3.6  |
| Escherichia coli 16S rRNA mutation in the rrsB gene conferring resistance to kanamycin A        | 1 | 77.3 | Escherichia coli K-12                | rRNA mutation model   | aminoglycoside resistance gene, antibiotic resistant gene variant or mutant | 1542 | 211 | 13.7 |
| Escherichia coli 16S rRNA mutation in the rrsB gene conferring resistance to tetracycline       | 1 | 94.2 | Escherichia coli K-12                | rRNA mutation model   | tetracycline resistance gene, antibiotic resistant gene variant or mutant   | 1542 | 107 | 6.9  |
| Escherichia coli 16S rRNA mutation in the rrsB gene conferring resistance to streptomycin       | 1 | 80.4 | Escherichia coli K-12                | rRNA mutation model   | aminoglycoside resistance gene, antibiotic resistant gene variant or mutant | 1542 | 322 | 20.9 |
| Mycobacterium smegmatis 16S rRNA mutation in the rrsA gene conferring resistance to kanamycin A | 1 | 81.1 | Mycobacterium smegmatis str. MC2 155 | rRNA mutation model   | aminoglycoside resistance gene, antibiotic resistant gene variant or mutant | 1528 | 506 | 33.1 |
| Mycobacterium chelonae 16S rRNA mutation conferring resistance to kanamycin A                   | 1 | 76.6 | Mycobacterium                        | rRNA mutation model   | aminoglycoside resistance gene, antibiotic resistant gene variant or mutant | 1441 | 301 | 20.9 |
| Escherichia coli 16S rRNA mutation in the rrnB gene conferring resistance to tetracycline       | 1 | 77.2 | Escherichia coli K-12                | rRNA mutation model   | tetracycline resistance gene, antibiotic resistant gene variant or mutant   | 1542 | 284 | 18.4 |
| Mycobacterium abscessus 16S rRNA mutation conferring resistance to gentamicin                   | 1 | 96.7 | Mycobacterium abscessus              | rRNA mutation model   | aminoglycoside resistance gene, antibiotic resistant gene variant or mutant | 1504 | 159 | 10.6 |

| Gene                                                                                                              | Alignments | Average Accuracy (%) | Taxon                              | CARD Model            | CARD category                                                                                                                | Gene length (base pairs) | Covered length | Gene coverage (100%) |
|-------------------------------------------------------------------------------------------------------------------|------------|----------------------|------------------------------------|-----------------------|------------------------------------------------------------------------------------------------------------------------------|--------------------------|----------------|----------------------|
| Pasteurella multocida 16S rRNA mutation conferring resistance to spectinomycin                                    | 21         | 88.4                 | Pasteurella multocida 36950        | rRNA mutation model   | aminoglycoside resistance gene, antibiotic resistant gene variant or mutant                                                  | 1551                     | 1551           | 100.0                |
| tetQ                                                                                                              | 5          | 89.8                 | Bacteroides fragilis               | protein homolog model | tetracycline resistance gene, antibiotic target protection protein                                                           | 1974                     | 1204           | 61.0                 |
| Haemophilus parainfluenzae parC conferring resistance to fluoroquinolones                                         | 5          | 89.5                 | Haemophilus parainfluenzae         | protein variant model | fluoroquinolone resistance gene, antibiotic resistant gene variant or mutant                                                 | 2256                     | 1338           | 59.3                 |
| Haemophilus parainfluenzae gyrA conferring resistance to fluoroquinolones                                         | 4          | 89                   | Haemophilus parainfluenzae         | protein variant model | fluoroquinolone resistance gene, antibiotic resistant gene variant or mutant                                                 | 2646                     | 1105           | 41.8                 |
| Enterococcus faecium EF-Tu mutants conferring resistance to GE2270A                                               | 4          | 73.4                 | Enterococcus faecium DO            | protein variant model | elfamycin resistance gene, antibiotic resistant gene variant or mutant                                                       | 1272                     | 1194           | 93.9                 |
| pmrA efflux pump                                                                                                  | 3          | 87.1                 | Streptococcus pneumoniae R6        | protein homolog model | efflux pump conferring antibiotic resistance                                                                                 | 1200                     | 1103           | 91.9                 |
| PBP2b                                                                                                             | 3          | 86                   | Streptococcus pneumoniae R6        | protein variant model | beta-lactam resistance gene, antibiotic resistant gene variant or mutant                                                     | 2058                     | 671            | 32.6                 |
| Streptococcus pneumonia parC conferring resistance to fluoroquinolone                                             | 3          | 82.4                 | Streptococcus pneumoniae TIGR4     | protein variant model | fluoroquinolone resistance gene, antibiotic resistant gene variant or mutant, gene involved in self resistance to antibiotic | 2473                     | 1295           | 52.4                 |
| Mycobacterium tuberculosis 16S rRNA mutation conferring resistance to streptomycin                                | 3          | 78.3                 | Mycobacterium tuberculosis H37Rv   | rRNA mutation model   | aminoglycoside resistance gene, antibiotic resistant gene variant or mutant                                                  | 1537                     | 1145           | 74.5                 |
| Mycobacterium tuberculosis 16S rRNA mutation conferring resistance to amikacin                                    | 3          | 73.4                 | Mycobacterium tuberculosis H37Rv   | rRNA mutation model   | aminoglycoside resistance gene, antibiotic resistant gene variant or mutant                                                  | 1537                     | 1102           | 71.7                 |
| Salmonella enterica serovar Typhimurium 16S rRNA mutation in the rrsD gene conferring resistance to spectinomycin | 3          | 84.5                 | Salmonella enterica subsp. salamae | rRNA mutation model   | aminoglycoside resistance gene, antibiotic resistant gene variant or mutant                                                  | 1544                     | 718            | 46.5                 |
| Helicobacter pylori 16S rRNA mutation conferring resistance to tetracycline                                       | 3          | 76.7                 | Helicobacter pylori 26695          | rRNA mutation model   | tetracycline resistance gene, antibiotic resistant gene variant or mutant                                                    | 1501                     | 1501           | 100.0                |
| CfxA2                                                                                                             | 2          | 92.2                 | Prevotella intermedia              | protein homolog model | beta-lactam resistance gene, antibiotic inactivation enzyme                                                                  | 967                      | 537            | 55.5                 |
| mefA                                                                                                              | 2          | 91.2                 | Exiguobacterium sp.                | protein homolog       | efflux pump conferring antibiotic resistance                                                                                 | 1219                     | 481            | 39.5                 |

|                                                                                            |   |      |                                             |                       |                                                                                                               |      |      |      |
|--------------------------------------------------------------------------------------------|---|------|---------------------------------------------|-----------------------|---------------------------------------------------------------------------------------------------------------|------|------|------|
|                                                                                            |   |      | S3-2                                        | model                 |                                                                                                               |      |      |      |
| mel                                                                                        | 2 | 90.1 | Streptococcus pneumoniae Taiwan19F-14       | protein homolog model | efflux pump conferring antibiotic resistance                                                                  | 1465 | 579  | 39.5 |
| CfxA3                                                                                      | 2 | 93   | Capnocytophaga ochracea                     | protein homolog model | beta-lactam resistance gene, antibiotic inactivation enzyme                                                   | 967  | 607  | 62.8 |
| Neisseria gonorrhoeae gyrA conferring resistance to fluoroquinolones                       | 2 | 81.6 | Neisseria gonorrhoeae FA 1090               | protein variant model | fluoroquinolone resistance gene, antibiotic resistant gene variant or mutant                                  | 2751 | 1765 | 64.2 |
| Staphylococcus aureus rpoC conferring resistance to daptomycin                             | 2 | 73   | Staphylococcus aureus subsp. aureus MRSA252 | protein variant model | lipopeptide antibiotic resistance gene, antibiotic resistant gene variant or mutant                           | 3625 | 1087 | 30.0 |
| Escherichia coli EF-Tu mutants conferring resistance to Pulvomycin                         | 2 | 76.5 | Escherichia coli CFT073                     | protein variant model | elfamycin resistance gene, antibiotic resistant gene variant or mutant                                        | 1230 | 1198 | 97.4 |
| PBP2x                                                                                      | 2 | 81.8 | Streptococcus pneumoniae                    | protein variant model | beta-lactam resistance gene, antibiotic resistant gene variant or mutant                                      | 2253 | 1493 | 66.3 |
| Escherichia coli 16S rRNA mutation in the rrsB gene conferring resistance to spectinomycin | 2 | 86.4 | Escherichia coli K-12                       | rRNA mutation model   | aminoglycoside resistance gene, antibiotic resistant gene variant or mutant                                   | 1542 | 278  | 18.0 |
| patB                                                                                       | 1 | 88.4 | Streptococcus pneumoniae R6                 | protein homolog model | efflux pump conferring antibiotic resistance                                                                  | 1167 | 326  | 27.9 |
| RlmA(II)                                                                                   | 1 | 82.7 | Streptococcus pneumoniae                    | protein homolog model | macrolide resistance gene, gene involved in self resistance to antibiotic, antibiotic target modifying enzyme | 849  | 494  | 58.2 |
| mtrD                                                                                       | 1 | 68   | Neisseria meningitidis MC58                 | protein homolog model | gene modulating antibiotic efflux, efflux pump conferring antibiotic resistance                               | 3205 | 2976 | 92.9 |
| CfxA4                                                                                      | 1 | 91.7 | Bacteroides fragilis                        | protein homolog model | beta-lactam resistance gene, antibiotic inactivation enzyme                                                   | 967  | 133  | 13.8 |
| Mycobacterium tuberculosis rpoB mutants conferring resistance to rifampicin                | 1 | 72.2 | Mycobacterium tuberculosis H37Rv            | protein variant model | antibiotic resistant gene variant or mutant, rifampin resistance gene                                         | 3520 | 1529 | 43.4 |
| Escherichia coli rpoB mutants conferring resistance to rifampicin                          | 1 | 70.7 | Escherichia coli O157:H7 str. Sakai         | protein variant model | antibiotic resistant gene variant or mutant, rifampin resistance gene                                         | 4030 | 1681 | 41.7 |
| Neisseria gonorrhoeae parC conferring resistance to fluoroquinolone                        | 1 | 86.8 | Neisseria gonorrhoeae FA 1090               | protein variant model | fluoroquinolone resistance gene, antibiotic resistant gene variant or mutant                                  | 2304 | 454  | 19.7 |
| Mycobacterium smegmatis 16S                                                                | 1 | 80.3 | Mycobacterium                               | rRNA mutation         | aminoglycoside resistance gene, antibiotic                                                                    | 1528 | 204  | 13.4 |

|                                                                                              |   |      |                                      |                     |                                                                                 |      |      |      |
|----------------------------------------------------------------------------------------------|---|------|--------------------------------------|---------------------|---------------------------------------------------------------------------------|------|------|------|
| rRNA mutation in the rrsB gene conferring resistance to hygromycin B                         |   |      | smegmatis str. MC2 155               | model               | resistant gene variant or mutant                                                |      |      |      |
| Escherichia coli 16S rRNA mutation in the rrnB gene conferring resistance to streptomycin    | 1 | 73.3 | Escherichia coli K-12                | rRNA mutation model | aminoglycoside resistance gene, antibiotic resistant gene variant or mutant     | 1542 | 456  | 29.6 |
| Mycobacterium tuberculosis 16S rRNA mutation conferring resistance to viomycin               | 1 | 74.6 | Mycobacterium tuberculosis H37Rv     | rRNA mutation model | antibiotic resistant gene variant or mutant, peptide antibiotic resistance gene | 1537 | 1287 | 83.7 |
| Neisseria gonorrhoeae 16S rRNA mutation conferring resistance to spectinomycin               | 1 | 90   | Neisseria gonorrhoeae                | rRNA mutation model | aminoglycoside resistance gene, antibiotic resistant gene variant or mutant     | 1545 | 389  | 25.2 |
| Escherichia coli 16S rRNA mutation in the rrsH gene conferring resistance to spectinomycin   | 1 | 89.7 | Escherichia coli K-12                | rRNA mutation model | aminoglycoside resistance gene, antibiotic resistant gene variant or mutant     | 1542 | 203  | 13.2 |
| Propionibacterium acnes 16S rRNA mutation conferring resistance to tetracycline              | 1 | 78.7 | Propionibacterium acnes              | rRNA mutation model | tetracycline resistance gene, antibiotic resistant gene variant or mutant       | 1486 | 300  | 20.2 |
| Neisseria meningitidis 16S rRNA mutation conferring resistance to spectinomycin              | 1 | 88.2 | Neisseria meningitidis               | rRNA mutation model | aminoglycoside resistance gene, antibiotic resistant gene variant or mutant     | 1544 | 441  | 28.6 |
| Escherichia coli 16S rRNA mutation in the rrsB gene conferring resistance to tobramycin      | 1 | 81.4 | Escherichia coli K-12                | rRNA mutation model | aminoglycoside resistance gene, antibiotic resistant gene variant or mutant     | 1542 | 185  | 12.0 |
| Mycobacterium smegmatis 16S rRNA mutation in the rrsB gene conferring resistance to neomycin | 1 | 98.4 | Mycobacterium smegmatis str. MC2 155 | rRNA mutation model | aminoglycoside resistance gene, antibiotic resistant gene variant or mutant     | 1528 | 69   | 4.5  |
| Borrelia burgdorferi 16S rRNA mutation conferring resistance to gentamicin                   | 1 | 80.9 | Borrelia burgdorferi                 | rRNA mutation model | aminoglycoside resistance gene, antibiotic resistant gene variant or mutant     | 1477 | 206  | 13.9 |

---

Saliva3\_R1

---

| Gene                       | Alignments | Average Accuracy (%) | Taxon     | CARD Model    | CARD category                              | Gene length (base pairs) | Covered length | Gene coverage (100%) |
|----------------------------|------------|----------------------|-----------|---------------|--------------------------------------------|--------------------------|----------------|----------------------|
| Neisseria meningitidis 16S | 36         | 90.8                 | Neisseria | rRNA mutation | aminoglycoside resistance gene, antibiotic | 1544                     | 1452           | 94.0                 |

|                                                                                                  |    |      |                                      |                       |                                                                                 |      |      |       |
|--------------------------------------------------------------------------------------------------|----|------|--------------------------------------|-----------------------|---------------------------------------------------------------------------------|------|------|-------|
| rRNA mutation conferring resistance to spectinomycin                                             |    |      | meningitidis                         | model                 | resistant gene variant or mutant                                                |      |      |       |
| Neisseria gonorrhoeae parC conferring resistance to fluoroquinolone                              | 15 | 88.1 | Neisseria gonorrhoeae FA 1090        | protein variant model | fluoroquinolone resistance gene, antibiotic resistant gene variant or mutant    | 2304 | 1958 | 85.0  |
| Neisseria gonorrhoeae 16S rRNA mutation conferring resistance to spectinomycin                   | 13 | 91.3 | Neisseria gonorrhoeae                | rRNA mutation model   | aminoglycoside resistance gene, antibiotic resistant gene variant or mutant     | 1545 | 1099 | 71.1  |
| Pasteurella multocida 16S rRNA mutation conferring resistance to spectinomycin                   | 12 | 88.9 | Pasteurella multocida 36950          | rRNA mutation model   | aminoglycoside resistance gene, antibiotic resistant gene variant or mutant     | 1551 | 1551 | 100.0 |
| tetM                                                                                             | 8  | 89.2 | Clostridium difficile 630            | protein homolog model | tetracycline resistance gene, antibiotic target protection protein              | 1921 | 1552 | 80.8  |
| Mycobacterium smegmatis 16S rRNA mutation in the rrsB gene conferring resistance to neomycin     | 4  | 80.7 | Mycobacterium smegmatis str. MC2 155 | rRNA mutation model   | aminoglycoside resistance gene, antibiotic resistant gene variant or mutant     | 1528 | 1519 | 99.4  |
| Helicobacter pylori 16S rRNA mutation conferring resistance to tetracycline                      | 4  | 84.6 | Helicobacter pylori 26695            | rRNA mutation model   | tetracycline resistance gene, antibiotic resistant gene variant or mutant       | 1501 | 1519 | 101.2 |
| macB                                                                                             | 3  | 79.8 | Neisseria gonorrhoeae                | protein homolog model | efflux pump conferring antibiotic resistance                                    | 1935 | 828  | 42.8  |
| mtrD                                                                                             | 3  | 81.4 | Neisseria meningitidis MC58          | protein homolog model | gene modulating antibiotic efflux, efflux pump conferring antibiotic resistance | 3205 | 990  | 30.9  |
| Neisseria gonorrhoeae gyrA conferring resistance to fluoroquinolones                             | 3  | 83.4 | Neisseria gonorrhoeae FA 1090        | protein variant model | fluoroquinolone resistance gene, antibiotic resistant gene variant or mutant    | 2751 | 1201 | 43.7  |
| Haemophilus parainfluenzae gyrA conferring resistance to fluoroquinolones                        | 3  | 93.7 | Haemophilus parainfluenzae           | protein variant model | fluoroquinolone resistance gene, antibiotic resistant gene variant or mutant    | 2646 | 1162 | 43.9  |
| Escherichia coli EF-Tu mutants conferring resistance to Pulvomycin                               | 3  | 81   | Escherichia coli CFT073              | protein variant model | elfamycin resistance gene, antibiotic resistant gene variant or mutant          | 1230 | 1007 | 81.9  |
| Mycobacterium smegmatis 16S rRNA mutation in the rrsA gene conferring resistance to hygromycin B | 3  | 87   | Mycobacterium smegmatis str. MC2 155 | rRNA mutation model   | aminoglycoside resistance gene, antibiotic resistant gene variant or mutant     | 1528 | 1519 | 99.4  |
| Mycobacterium smegmatis 16S rRNA mutation in the rrsB gene conferring resistance to streptomycin | 3  | 83.4 | Mycobacterium smegmatis str. MC2 155 | rRNA mutation model   | aminoglycoside resistance gene, antibiotic resistant gene variant or mutant     | 1528 | 527  | 34.5  |

|                                                                                                           |   |      |                                            |                          |                                                                                                                     |      |     |      |
|-----------------------------------------------------------------------------------------------------------|---|------|--------------------------------------------|--------------------------|---------------------------------------------------------------------------------------------------------------------|------|-----|------|
| tet32                                                                                                     | 2 | 96.3 | Clostridiaceae<br>bacterium K10            | protein homolog<br>model | tetracycline resistance gene, antibiotic<br>target protection protein                                               | 1920 | 441 | 23.0 |
| mtrE                                                                                                      | 2 | 84.2 | Neisseria<br>gonorrhoeae                   | protein homolog<br>model | gene modulating antibiotic efflux, efflux<br>pump conferring antibiotic resistance                                  | 1405 | 482 | 34.3 |
| Haemophilus parainfluenzae<br>parC conferring resistance to<br>fluoroquinolones                           | 2 | 87.4 | Haemophilus<br>parainfluenzae              | protein variant<br>model | fluoroquinolone resistance gene, antibiotic<br>resistant gene variant or mutant                                     | 2256 | 895 | 39.7 |
| Escherichia coli rpoB mutants<br>conferring resistance to<br>rifampicin                                   | 2 | 80.3 | Escherichia coli<br>O157:H7 str. Sakai     | protein variant<br>model | antibiotic resistant gene variant or mutant,<br>rifampin resistance gene                                            | 4030 | 913 | 22.7 |
| Mycobacterium smegmatis 16S<br>rRNA mutation in the rrsB gene<br>conferring resistance to<br>hygromycin B | 2 | 88.5 | Mycobacterium<br>smegmatis str. MC2<br>155 | rRNA mutation<br>model   | aminoglycoside resistance gene, antibiotic<br>resistant gene variant or mutant                                      | 1528 | 393 | 25.7 |
| Mycobacterium tuberculosis<br>16S rRNA mutation conferring<br>resistance to viomycin                      | 2 | 92.8 | Mycobacterium<br>tuberculosis H37Rv        | rRNA mutation<br>model   | antibiotic resistant gene variant or mutant,<br>peptide antibiotic resistance gene                                  | 1537 | 235 | 15.3 |
| Mycobacterium smegmatis 16S<br>rRNA mutation in the rrsA gene<br>conferring resistance to<br>neomycin     | 2 | 85.3 | Mycobacterium<br>smegmatis str. MC2<br>155 | rRNA mutation<br>model   | aminoglycoside resistance gene, antibiotic<br>resistant gene variant or mutant                                      | 1528 | 996 | 65.2 |
| Propionibacterium acnes 16S<br>rRNA mutation conferring<br>resistance to tetracycline                     | 2 | 75.8 | Propionibacterium<br>acnes                 | rRNA mutation<br>model   | tetracycline resistance gene, antibiotic<br>resistant gene variant or mutant                                        | 1486 | 514 | 34.6 |
| Escherichia coli 16S rRNA<br>mutation conferring resistance<br>to edeine                                  | 2 | 78.2 | Escherichia coli<br>K-12                   | rRNA mutation<br>model   | polyamine resistance gene, antibiotic<br>resistant gene variant or mutant, peptide<br>antibiotic resistance gene    | 1542 | 315 | 20.4 |
| Mycobacterium abscessus 16S<br>rRNA mutation conferring<br>resistance to amikacin                         | 2 | 88.5 | Mycobacterium<br>abscessus                 | rRNA mutation<br>model   | aminoglycoside resistance gene, antibiotic<br>resistant gene variant or mutant                                      | 1504 | 528 | 35.1 |
| Mycobacterium smegmatis 16S<br>rRNA mutation in the rrsB gene<br>conferring resistance to<br>kanamycin A  | 2 | 84.9 | Mycobacterium<br>smegmatis str. MC2<br>155 | rRNA mutation<br>model   | aminoglycoside resistance gene, antibiotic<br>resistant gene variant or mutant                                      | 1528 | 506 | 33.1 |
| patB                                                                                                      | 1 | 87.3 | Streptococcus<br>pneumoniae R6             | protein homolog<br>model | efflux pump conferring antibiotic resistance                                                                        | 1167 | 284 | 24.3 |
| lnuC                                                                                                      | 1 | 96.6 | Streptococcus<br>agalactiae                | protein homolog<br>model | antibiotic inactivation enzyme, lincosamide<br>resistance gene                                                      | 495  | 230 | 46.5 |
| RlmA(II)                                                                                                  | 1 | 82.4 | Streptococcus<br>pneumoniae                | protein homolog<br>model | macrolide resistance gene, gene involved<br>in self resistance to antibiotic, antibiotic<br>target modifying enzyme | 849  | 277 | 32.6 |

|                                                                                    |   |      |                                             |                       |                                                                                     |      |      |      |
|------------------------------------------------------------------------------------|---|------|---------------------------------------------|-----------------------|-------------------------------------------------------------------------------------|------|------|------|
| TEM-54                                                                             | 1 | 88.4 | Escherichia coli                            | protein homolog model | beta-lactam resistance gene, antibiotic inactivation enzyme                         | 861  | 407  | 47.3 |
| mtrC                                                                               | 1 | 79.2 | Neisseria meningitidis MC58                 | protein homolog model | gene modulating antibiotic efflux, efflux pump conferring antibiotic resistance     | 1240 | 755  | 60.9 |
| mefA                                                                               | 1 | 85   | Exiguobacterium sp. S3-2                    | protein homolog model | efflux pump conferring antibiotic resistance                                        | 1219 | 228  | 18.7 |
| farA                                                                               | 1 | 74.3 | Neisseria meningitidis MC58                 | protein homolog model | gene modulating antibiotic efflux, efflux pump conferring antibiotic resistance     | 1155 | 324  | 28.1 |
| IsaC                                                                               | 1 | 80.8 | Streptococcus agalactiae                    | protein homolog model | efflux pump conferring antibiotic resistance                                        | 1480 | 579  | 39.1 |
| tetQ                                                                               | 1 | 93.8 | Bacteroides fragilis                        | protein homolog model | tetracycline resistance gene, antibiotic target protection protein                  | 1974 | 179  | 9.1  |
| pmrA efflux pump                                                                   | 1 | 94.4 | Streptococcus pneumoniae R6                 | protein homolog model | efflux pump conferring antibiotic resistance                                        | 1200 | 1108 | 92.3 |
| Mycobacterium leprae rpoB mutants conferring resistance to rifampicin              | 1 | 71.1 | Mycobacterium leprae TN                     | protein variant model | antibiotic resistant gene variant or mutant, rifampin resistance gene               | 3538 | 1694 | 47.9 |
| Clostridium difficile EF-Tu mutants conferring resistance to elfamycin             | 1 | 76.6 | Clostridium difficile                       | protein variant model | elfamycin resistance gene, antibiotic resistant gene variant or mutant              | 1194 | 859  | 71.9 |
| Staphylococcus aureus rpoC conferring resistance to daptomycin                     | 1 | 87.4 | Staphylococcus aureus subsp. aureus MRSA252 | protein variant model | lipopeptide antibiotic resistance gene, antibiotic resistant gene variant or mutant | 3625 | 102  | 2.8  |
| Escherichia coli gyrB conferring resistance to aminocoumarin                       | 1 | 68.6 | Escherichia coli str. K-12 substr. W3110    | protein variant model | antibiotic resistant gene variant or mutant, aminocoumarin resistance gene          | 2416 | 603  | 25.0 |
| Mycobacterium tuberculosis rpsL mutations conferring resistance to Streptomycin    | 1 | 78.6 | Mycobacterium tuberculosis CDC1551          | protein variant model | aminoglycoside resistance gene, antibiotic resistant gene variant or mutant         | 376  | 220  | 58.5 |
| rpsJ                                                                               | 1 | 84.3 | Neisseria gonorrhoeae FA 1090               | protein variant model | tetracycline resistance gene, antibiotic target protection protein                  | 312  | 310  | 99.4 |
| Enterococcus faecium EF-Tu mutants conferring resistance to GE2270A                | 1 | 78   | Enterococcus faecium DO                     | protein variant model | elfamycin resistance gene, antibiotic resistant gene variant or mutant              | 1272 | 238  | 18.7 |
| Mycobacterium tuberculosis 16S rRNA mutation conferring resistance to streptomycin | 1 | 81   | Mycobacterium tuberculosis H37Rv            | rRNA mutation model   | aminoglycoside resistance gene, antibiotic resistant gene variant or mutant         | 1537 | 118  | 7.7  |
| Mycobacterium tuberculosis 16S rRNA mutation conferring                            | 1 | 86.4 | Mycobacterium tuberculosis H37Rv            | rRNA mutation model   | aminoglycoside resistance gene, antibiotic resistant gene variant or mutant         | 1537 | 218  | 14.2 |



|                                                                                                                   |   |      |                                      |                     |                                                                             |      |     |      |
|-------------------------------------------------------------------------------------------------------------------|---|------|--------------------------------------|---------------------|-----------------------------------------------------------------------------|------|-----|------|
| resistance to amikacin                                                                                            |   |      |                                      |                     |                                                                             |      |     |      |
| Borrelia burgdorferi 16S rRNA mutation conferring resistance to kanamycin                                         | 1 | 78.9 | Borrelia burgdorferi                 | rRNA mutation model | aminoglycoside resistance gene, antibiotic resistant gene variant or mutant | 1477 | 373 | 25.3 |
| Escherichia coli 16S rRNA mutation in the rrsB gene conferring resistance to gentamicin C                         | 1 | 78.1 | Escherichia coli K-12                | rRNA mutation model | aminoglycoside resistance gene, antibiotic resistant gene variant or mutant | 1542 | 411 | 26.7 |
| Escherichia coli 16S rRNA mutation in the rrsB gene conferring resistance to spectinomycin                        | 1 | 82.5 | Escherichia coli K-12                | rRNA mutation model | aminoglycoside resistance gene, antibiotic resistant gene variant or mutant | 1542 | 262 | 17.0 |
| Mycobacterium smegmatis 16S rRNA mutation in the rrsA gene conferring resistance to kanamycin A                   | 1 | 86.8 | Mycobacterium smegmatis str. MC2 155 | rRNA mutation model | aminoglycoside resistance gene, antibiotic resistant gene variant or mutant | 1544 | 241 | 15.6 |
| Salmonella enterica serovar Typhimurium 16S rRNA mutation in the rrsD gene conferring resistance to spectinomycin | 1 | 78   | Salmonella enterica subsp. salamae   | rRNA mutation model | aminoglycoside resistance gene, antibiotic resistant gene variant or mutant | 1544 | 241 | 15.6 |
| Mycobacterium abscessus 16S rRNA mutation conferring resistance to gentamicin                                     | 1 | 85.9 | Mycobacterium abscessus              | rRNA mutation model | aminoglycoside resistance gene, antibiotic resistant gene variant or mutant | 1504 | 350 | 23.3 |
| Mycobacterium abscessus 16S rRNA mutation conferring resistance to kanamycin                                      | 1 | 84.5 | Mycobacterium abscessus              | rRNA mutation model | aminoglycoside resistance gene, antibiotic resistant gene variant or mutant | 1504 | 166 | 11.0 |
| Mycobacterium tuberculosis 16S rRNA mutation conferring resistance to kanamycin                                   | 1 | 80.9 | Mycobacterium tuberculosis H37Rv     | rRNA mutation model | aminoglycoside resistance gene, antibiotic resistant gene variant or mutant | 1537 | 449 | 29.2 |
| Mycobacterium abscessus 16S rRNA mutation conferring resistance to tobramycin                                     | 1 | 93.1 | Mycobacterium abscessus              | rRNA mutation model | aminoglycoside resistance gene, antibiotic resistant gene variant or mutant | 1504 | 217 | 14.4 |

---

Saliva3\_R2

---

| Gene                                                | Alignments | Average Accuracy (%) | Taxon                  | CARD Model          | CARD category                                                               | Gene length (base pairs) | Covered length | Gene coverage (100%) |
|-----------------------------------------------------|------------|----------------------|------------------------|---------------------|-----------------------------------------------------------------------------|--------------------------|----------------|----------------------|
| Neisseria meningitidis 16S rRNA mutation conferring | 12         | 91.9                 | Neisseria meningitidis | rRNA mutation model | aminoglycoside resistance gene, antibiotic resistant gene variant or mutant | 1544                     | 1318           | 85.4                 |

|                                                                                                  |   |      |                                       |                       |                                                                                 |      |     |      |
|--------------------------------------------------------------------------------------------------|---|------|---------------------------------------|-----------------------|---------------------------------------------------------------------------------|------|-----|------|
| resistance to spectinomycin                                                                      |   |      |                                       |                       |                                                                                 |      |     |      |
| Neisseria gonorrhoeae 16S rRNA mutation conferring resistance to spectinomycin                   | 8 | 93   | Neisseria gonorrhoeae                 | rRNA mutation model   | aminoglycoside resistance gene, antibiotic resistant gene variant or mutant     | 1545 | 460 | 29.8 |
| Pasteurella multocida 16S rRNA mutation conferring resistance to spectinomycin                   | 6 | 87.2 | Pasteurella multocida 36950           | rRNA mutation model   | aminoglycoside resistance gene, antibiotic resistant gene variant or mutant     | 1551 | 716 | 46.2 |
| Neisseria gonorrhoeae parC conferring resistance to fluoroquinolone                              | 4 | 92.3 | Neisseria gonorrhoeae FA 1090         | protein variant model | fluoroquinolone resistance gene, antibiotic resistant gene variant or mutant    | 2304 | 849 | 36.8 |
| Enterococcus faecium EF-Tu mutants conferring resistance to GE2270A                              | 3 | 78.8 | Enterococcus faecium DO               | protein variant model | elfamycin resistance gene, antibiotic resistant gene variant or mutant          | 1272 | 829 | 65.2 |
| Propionibacterium acnes 16S rRNA mutation conferring resistance to tetracycline                  | 3 | 82.7 | Propionibacterium acnes               | rRNA mutation model   | tetracycline resistance gene, antibiotic resistant gene variant or mutant       | 1486 | 750 | 50.5 |
| Mycobacterium smegmatis 16S rRNA mutation in the rrsB gene conferring resistance to neomycin     | 3 | 86   | Mycobacterium smegmatis str. MC2 155  | rRNA mutation model   | aminoglycoside resistance gene, antibiotic resistant gene variant or mutant     | 1528 | 874 | 57.2 |
| mel                                                                                              | 2 | 98.5 | Streptococcus pneumoniae Taiwan19F-14 | protein homolog model | efflux pump conferring antibiotic resistance                                    | 1465 | 427 | 29.1 |
| Mycobacterium smegmatis 16S rRNA mutation in the rrsB gene conferring resistance to streptomycin | 2 | 86.2 | Mycobacterium smegmatis str. MC2 155  | rRNA mutation model   | aminoglycoside resistance gene, antibiotic resistant gene variant or mutant     | 1528 | 251 | 16.4 |
| Mycobacterium smegmatis 16S rRNA mutation in the rrsA gene conferring resistance to neomycin     | 2 | 85.1 | Mycobacterium smegmatis str. MC2 155  | rRNA mutation model   | aminoglycoside resistance gene, antibiotic resistant gene variant or mutant     | 1528 | 329 | 21.5 |
| tet32                                                                                            | 1 | 86.7 | Clostridiaceae bacterium K10          | protein homolog model | tetracycline resistance gene, antibiotic target protection protein              | 1920 | 331 | 17.2 |
| tetM                                                                                             | 1 | 85.8 | Clostridium difficile 630             | protein homolog model | tetracycline resistance gene, antibiotic target protection protein              | 1921 | 338 | 17.6 |
| pmrA efflux pump                                                                                 | 1 | 91.5 | Streptococcus pneumoniae R6           | protein homolog model | efflux pump conferring antibiotic resistance                                    | 1200 | 225 | 18.8 |
| mtrD                                                                                             | 1 | 76   | Neisseria meningitidis MC58           | protein homolog model | gene modulating antibiotic efflux, efflux pump conferring antibiotic resistance | 3205 | 464 | 14.5 |
| Haemophilus parainfluenzae                                                                       | 1 | 93   | Haemophilus                           | protein variant       | fluoroquinolone resistance gene, antibiotic                                     | 2256 | 513 | 22.7 |

|                                                                                                  |   |      |                                      |                     |                                                                                 |      |     |      |
|--------------------------------------------------------------------------------------------------|---|------|--------------------------------------|---------------------|---------------------------------------------------------------------------------|------|-----|------|
| parC conferring resistance to fluoroquinolones                                                   |   |      | parainfluenzae                       | model               | resistant gene variant or mutant                                                |      |     |      |
| Mycobacterium abscessus 16S rRNA mutation conferring resistance to neomycin                      | 1 | 81.2 | Mycobacterium abscessus              | rRNA mutation model | aminoglycoside resistance gene, antibiotic resistant gene variant or mutant     | 1504 | 508 | 33.8 |
| Mycobacterium tuberculosis 16S rRNA mutation conferring resistance to streptomycin               | 1 | 91.7 | Mycobacterium tuberculosis H37Rv     | rRNA mutation model | aminoglycoside resistance gene, antibiotic resistant gene variant or mutant     | 1537 | 65  | 4.2  |
| Escherichia coli 16S rRNA mutation in the rrsB gene conferring resistance to kanamycin A         | 1 | 83.2 | Escherichia coli K-12                | rRNA mutation model | aminoglycoside resistance gene, antibiotic resistant gene variant or mutant     | 1542 | 193 | 12.5 |
| Borrelia burgdorferi 16S rRNA mutation conferring resistance to spectinomycin                    | 1 | 74.7 | Borrelia burgdorferi                 | rRNA mutation model | aminoglycoside resistance gene, antibiotic resistant gene variant or mutant     | 1477 | 370 | 25.1 |
| Mycobacterium tuberculosis 16S rRNA mutation conferring resistance to amikacin                   | 1 | 84.5 | Mycobacterium tuberculosis H37Rv     | rRNA mutation model | aminoglycoside resistance gene, antibiotic resistant gene variant or mutant     | 1537 | 166 | 10.8 |
| Escherichia coli 16S rRNA mutation in the rrsH gene conferring resistance to spectinomycin       | 1 | 74.9 | Escherichia coli K-12                | rRNA mutation model | aminoglycoside resistance gene, antibiotic resistant gene variant or mutant     | 1542 | 202 | 13.1 |
| Mycobacterium smegmatis 16S rRNA mutation in the rrsA gene conferring resistance to hygromycin B | 1 | 89   | Mycobacterium smegmatis str. MC2 155 | rRNA mutation model | aminoglycoside resistance gene, antibiotic resistant gene variant or mutant     | 1528 | 193 | 12.6 |
| Escherichia coli 16S rRNA mutation in the rrsB gene conferring resistance to spectinomycin       | 1 | 80.8 | Escherichia coli K-12                | rRNA mutation model | aminoglycoside resistance gene, antibiotic resistant gene variant or mutant     | 1542 | 221 | 14.3 |
| Mycobacterium smegmatis 16S rRNA mutation in the rrsA gene conferring resistance to kanamycin A  | 1 | 83.1 | Mycobacterium smegmatis str. MC2 155 | rRNA mutation model | aminoglycoside resistance gene, antibiotic resistant gene variant or mutant     | 1528 | 154 | 10.1 |
| Mycobacterium smegmatis 16S rRNA mutation in the rrsB gene conferring resistance to viomycin     | 1 | 84.3 | Mycobacterium smegmatis str. MC2 155 | rRNA mutation model | antibiotic resistant gene variant or mutant, peptide antibiotic resistance gene | 1528 | 523 | 34.2 |
| Mycobacterium abscessus 16S rRNA mutation conferring resistance to gentamicin                    | 1 | 85   | Mycobacterium abscessus              | rRNA mutation model | aminoglycoside resistance gene, antibiotic resistant gene variant or mutant     | 1504 | 255 | 17.0 |

|                                                                                                 |   |      |                                      |                     |                                                                                 |      |     |      |
|-------------------------------------------------------------------------------------------------|---|------|--------------------------------------|---------------------|---------------------------------------------------------------------------------|------|-----|------|
| Mycobacterium smegmatis 16S rRNA mutation in the rrsA gene conferring resistance to viomycin    | 1 | 85.7 | Mycobacterium smegmatis str. MC2 155 | rRNA mutation model | antibiotic resistant gene variant or mutant, peptide antibiotic resistance gene | 1528 | 252 | 16.5 |
| Mycobacterium abscessus 16S rRNA mutation conferring resistance to amikacin                     | 1 | 84.1 | Mycobacterium abscessus              | rRNA mutation model | aminoglycoside resistance gene, antibiotic resistant gene variant or mutant     | 1504 | 161 | 10.7 |
| Mycobacterium smegmatis 16S rRNA mutation in the rrsB gene conferring resistance to kanamycin A | 1 | 92.7 | Mycobacterium smegmatis str. MC2 155 | rRNA mutation model | aminoglycoside resistance gene, antibiotic resistant gene variant or mutant     | 1528 | 111 | 7.3  |

#### Stool1\_R1

| Gene                                                                                                              | Alignments | Average Accuracy (%) | Taxon                                | CARD Model            | CARD category                                                                   | Gene length (base pairs) | Covered length | Gene coverage (100%) |
|-------------------------------------------------------------------------------------------------------------------|------------|----------------------|--------------------------------------|-----------------------|---------------------------------------------------------------------------------|--------------------------|----------------|----------------------|
| Neisseria gonorrhoeae 16S rRNA mutation conferring resistance to spectinomycin                                    | 11         | 81.5                 | Neisseria gonorrhoeae                | rRNA mutation model   | aminoglycoside resistance gene, antibiotic resistant gene variant or mutant     | 1545                     | 1080           | 69.9                 |
| Neisseria meningitidis 16S rRNA mutation conferring resistance to spectinomycin                                   | 11         | 82                   | Neisseria meningitidis               | rRNA mutation model   | aminoglycoside resistance gene, antibiotic resistant gene variant or mutant     | 1544                     | 1410           | 91.3                 |
| tetQ                                                                                                              | 9          | 89.4                 | Bacteroides fragilis                 | protein homolog model | tetracycline resistance gene, antibiotic target protection protein              | 1974                     | 1670           | 84.6                 |
| Salmonella enterica serovar Typhimurium 16S rRNA mutation in the rrsD gene conferring resistance to spectinomycin | 7          | 80.4                 | Salmonella enterica subsp. salamae   | rRNA mutation model   | aminoglycoside resistance gene, antibiotic resistant gene variant or mutant     | 1544                     | 1146           | 74.2                 |
| tetM                                                                                                              | 6          | 90.9                 | Clostridium difficile 630            | protein homolog model | tetracycline resistance gene, antibiotic target protection protein              | 1921                     | 1514           | 78.8                 |
| Mycobacterium tuberculosis 16S rRNA mutation conferring resistance to viomycin                                    | 6          | 82.8                 | Mycobacterium tuberculosis H37Rv     | rRNA mutation model   | antibiotic resistant gene variant or mutant, peptide antibiotic resistance gene | 1537                     | 887            | 57.7                 |
| Propionibacterium acnes 16S rRNA mutation conferring resistance to tetracycline                                   | 6          | 80.4                 | Propionibacterium acnes              | rRNA mutation model   | tetracycline resistance gene, antibiotic resistant gene variant or mutant       | 1486                     | 832            | 56.0                 |
| Mycobacterium smegmatis 16S rRNA mutation in the rrsB gene conferring resistance to                               | 6          | 81.3                 | Mycobacterium smegmatis str. MC2 155 | rRNA mutation model   | antibiotic resistant gene variant or mutant, peptide antibiotic resistance gene | 1528                     | 921            | 60.3                 |

|                                                                                                  |   |      |                                      |                       |                                                                                 |      |      |      |
|--------------------------------------------------------------------------------------------------|---|------|--------------------------------------|-----------------------|---------------------------------------------------------------------------------|------|------|------|
| viomycin                                                                                         |   |      |                                      |                       |                                                                                 |      |      |      |
| Mycobacterium tuberculosis 16S rRNA mutation conferring resistance to kanamycin                  | 6 | 84   | Mycobacterium tuberculosis H37Rv     | rRNA mutation model   | aminoglycoside resistance gene, antibiotic resistant gene variant or mutant     | 1537 | 1095 | 71.2 |
| tetO                                                                                             | 5 | 90.6 | Campylobacter jejuni                 | protein homolog model | tetracycline resistance gene, antibiotic target protection protein              | 1920 | 935  | 48.7 |
| Mycobacterium tuberculosis 16S rRNA mutation conferring resistance to amikacin                   | 5 | 77   | Mycobacterium tuberculosis H37Rv     | rRNA mutation model   | aminoglycoside resistance gene, antibiotic resistant gene variant or mutant     | 1537 | 976  | 63.5 |
| Chlamydomphila psittaci 16S rRNA mutation conferring resistance to spectinomycin                 | 5 | 79   | Chlamydia psittaci 6BC               | rRNA mutation model   | aminoglycoside resistance gene, antibiotic resistant gene variant or mutant     | 1507 | 844  | 56.0 |
| Mycobacterium smegmatis 16S rRNA mutation in the rrsB gene conferring resistance to streptomycin | 5 | 83.8 | Mycobacterium smegmatis str. MC2 155 | rRNA mutation model   | aminoglycoside resistance gene, antibiotic resistant gene variant or mutant     | 1528 | 1323 | 86.6 |
| Helicobacter pylori 16S rRNA mutation conferring resistance to tetracycline                      | 5 | 83.4 | Helicobacter pylori 26695            | rRNA mutation model   | tetracycline resistance gene, antibiotic resistant gene variant or mutant       | 1501 | 801  | 53.4 |
| tet32                                                                                            | 4 | 94.3 | Clostridiaceae bacterium K10         | protein homolog model | tetracycline resistance gene, antibiotic target protection protein              | 1920 | 733  | 38.2 |
| Bifidobacteria intrinsic ileS conferring resistance to mupirocin                                 | 4 | 85.1 | Bifidobacterium bifidum PRL2010      | protein homolog model | mupirocin resistance gene                                                       | 3324 | 989  | 29.8 |
| Escherichia coli 16S rRNA mutation in the rrsB gene conferring resistance to kanamycin A         | 4 | 77.7 | Escherichia coli K-12                | rRNA mutation model   | aminoglycoside resistance gene, antibiotic resistant gene variant or mutant     | 1542 | 1538 | 99.7 |
| Mycobacterium smegmatis 16S rRNA mutation in the rrsA gene conferring resistance to viomycin     | 4 | 82.6 | Mycobacterium smegmatis str. MC2 155 | rRNA mutation model   | antibiotic resistant gene variant or mutant, peptide antibiotic resistance gene | 1528 | 882  | 57.7 |
| tet40                                                                                            | 3 | 93.5 | Streptococcus suis                   | protein homolog model | efflux pump conferring antibiotic resistance                                    | 1222 | 663  | 54.3 |
| Mycobacterium tuberculosis 16S rRNA mutation conferring resistance to streptomycin               | 3 | 82.1 | Mycobacterium tuberculosis H37Rv     | rRNA mutation model   | aminoglycoside resistance gene, antibiotic resistant gene variant or mutant     | 1537 | 1152 | 75.0 |
| Pasteurella multocida 16S rRNA mutation conferring resistance to spectinomycin                   | 3 | 80.1 | Pasteurella multocida 36950          | rRNA mutation model   | aminoglycoside resistance gene, antibiotic resistant gene variant or mutant     | 1551 | 481  | 31.0 |

|                                                                                                  |   |      |                                      |                       |                                                                             |      |     |      |
|--------------------------------------------------------------------------------------------------|---|------|--------------------------------------|-----------------------|-----------------------------------------------------------------------------|------|-----|------|
| Escherichia coli 16S rRNA mutation in the rrsH gene conferring resistance to spectinomycin       | 3 | 78.7 | Escherichia coli K-12                | rRNA mutation model   | aminoglycoside resistance gene, antibiotic resistant gene variant or mutant | 1542 | 563 | 36.5 |
| Mycobacterium smegmatis 16S rRNA mutation in the rrsA gene conferring resistance to neomycin     | 3 | 82.7 | Mycobacterium smegmatis str. MC2 155 | rRNA mutation model   | aminoglycoside resistance gene, antibiotic resistant gene variant or mutant | 1528 | 890 | 58.2 |
| Escherichia coli 16S rRNA mutation in the rrsC gene conferring resistance to kasugamicin         | 3 | 79.9 | Escherichia coli K-12                | rRNA mutation model   | aminoglycoside resistance gene, antibiotic resistant gene variant or mutant | 1542 | 360 | 23.3 |
| Mycobacterium abscessus 16S rRNA mutation conferring resistance to amikacin                      | 3 | 80.6 | Mycobacterium abscessus              | rRNA mutation model   | aminoglycoside resistance gene, antibiotic resistant gene variant or mutant | 1504 | 796 | 52.9 |
| Mycobacterium chelonae 16S rRNA mutation conferring resistance to tobramycin                     | 3 | 81   | Mycobacterium                        | rRNA mutation model   | aminoglycoside resistance gene, antibiotic resistant gene variant or mutant | 1441 | 612 | 42.5 |
| Mycobacterium tuberculosis rpoB mutants conferring resistance to rifampicin                      | 2 | 78.6 | Mycobacterium tuberculosis H37Rv     | protein variant model | antibiotic resistant gene variant or mutant, rifampin resistance gene       | 3520 | 720 | 20.5 |
| Escherichia coli 16S rRNA mutation in the rrsB gene conferring resistance to neomycin            | 2 | 86.2 | Escherichia coli K-12                | rRNA mutation model   | aminoglycoside resistance gene, antibiotic resistant gene variant or mutant | 1542 | 343 | 22.2 |
| Mycobacterium smegmatis 16S rRNA mutation in the rrsA gene conferring resistance to hygromycin B | 2 | 80.5 | Mycobacterium smegmatis str. MC2 155 | rRNA mutation model   | aminoglycoside resistance gene, antibiotic resistant gene variant or mutant | 1528 | 434 | 28.4 |
| Borrelia burgdorferi 16S rRNA mutation conferring resistance to kanamycin                        | 2 | 82   | Borrelia burgdorferi                 | rRNA mutation model   | aminoglycoside resistance gene, antibiotic resistant gene variant or mutant | 1477 | 233 | 15.8 |
| Mycobacterium chelonae 16S rRNA mutation conferring resistance to amikacin                       | 2 | 87.1 | Mycobacterium                        | rRNA mutation model   | aminoglycoside resistance gene, antibiotic resistant gene variant or mutant | 1441 | 434 | 30.1 |
| Mycobacterium smegmatis 16S rRNA mutation in the rrsA gene conferring resistance to kanamycin A  | 2 | 79.4 | Mycobacterium smegmatis str. MC2 155 | rRNA mutation model   | aminoglycoside resistance gene, antibiotic resistant gene variant or mutant | 1528 | 925 | 60.5 |
| Escherichia coli 16S rRNA mutation in the rrnB gene conferring resistance to                     | 2 | 83.2 | Escherichia coli K-12                | rRNA mutation model   | tetracycline resistance gene, antibiotic resistant gene variant or mutant   | 1542 | 248 | 16.1 |

|                                                                                                 |   |      |                                           |                       |                                                                                                                           |      |      |      |
|-------------------------------------------------------------------------------------------------|---|------|-------------------------------------------|-----------------------|---------------------------------------------------------------------------------------------------------------------------|------|------|------|
| tetracycline                                                                                    |   |      |                                           |                       |                                                                                                                           |      |      |      |
| Escherichia coli 16S rRNA mutation conferring resistance to edeine                              | 2 | 89.8 | Escherichia coli K-12                     | rRNA mutation model   | polyamine resistance gene, antibiotic resistant gene variant or mutant, peptide antibiotic resistance gene                | 1542 | 392  | 25.4 |
| Escherichia coli 16S rRNA mutation in the rrsB gene conferring resistance to tobramycin         | 2 | 79.1 | Escherichia coli K-12                     | rRNA mutation model   | aminoglycoside resistance gene, antibiotic resistant gene variant or mutant                                               | 1542 | 604  | 39.2 |
| Mycobacterium smegmatis 16S rRNA mutation in the rrsB gene conferring resistance to kanamycin A | 2 | 83.3 | Mycobacterium smegmatis str. MC2 155      | rRNA mutation model   | aminoglycoside resistance gene, antibiotic resistant gene variant or mutant                                               | 1528 | 1470 | 96.2 |
| Mycobacterium smegmatis 16S rRNA mutation in the rrsB gene conferring resistance to neomycin    | 2 | 77.6 | Mycobacterium smegmatis str. MC2 155      | rRNA mutation model   | aminoglycoside resistance gene, antibiotic resistant gene variant or mutant                                               | 1528 | 742  | 48.6 |
| Escherichia coli 16S rRNA mutation in the rrsB gene conferring resistance to paromomycin        | 2 | 78.9 | Escherichia coli K-12                     | rRNA mutation model   | aminoglycoside resistance gene, antibiotic resistant gene variant or mutant                                               | 1542 | 906  | 58.8 |
| sul2                                                                                            | 1 | 94.3 | Vibrio cholerae                           | protein homolog model | sulfonamide resistance gene, antibiotic target replacement protein                                                        | 817  | 105  | 12.9 |
| PmrF                                                                                            | 1 | 94.1 | Escherichia coli str. K-12 substr. MG1655 | protein homolog model | gene altering cell wall charge conferring antibiotic resistance, polymyxin resistance gene                                | 970  | 201  | 20.7 |
| ANT(6)-Ib                                                                                       | 1 | 94.8 | Campylobacter jejuni                      | protein homolog model | aminoglycoside resistance gene, antibiotic inactivation enzyme                                                            | 867  | 363  | 41.9 |
| dfrF                                                                                            | 1 | 92   | Enterococcus faecalis                     | protein homolog model | trimethoprim resistance gene, antibiotic target replacement protein                                                       | 496  | 164  | 33.1 |
| ErmB                                                                                            | 1 | 90.5 | Enterococcus faecium                      | protein homolog model | antibiotic target modifying enzyme, macrolide resistance gene, streptogramin resistance gene, lincosamide resistance gene | 748  | 157  | 21.0 |
| tetW                                                                                            | 1 | 94.5 | Bifidobacterium longum                    | protein homolog model | tetracycline resistance gene, antibiotic target protection protein                                                        | 1920 | 404  | 21.0 |
| ErmF                                                                                            | 1 | 96.7 | Bacteroides fragilis                      | protein homolog model | antibiotic target modifying enzyme, macrolide resistance gene, streptogramin resistance gene, lincosamide resistance gene | 801  | 332  | 41.4 |
| mefA                                                                                            | 1 | 100  | Exiguobacterium sp. S3-2                  | protein homolog model | efflux pump conferring antibiotic resistance                                                                              | 1219 | 53   | 4.3  |

|                                                                                                  |   |      |                                           |                       |                                                                                                       |      |     |      |
|--------------------------------------------------------------------------------------------------|---|------|-------------------------------------------|-----------------------|-------------------------------------------------------------------------------------------------------|------|-----|------|
| mdtE                                                                                             | 1 | 89.2 | Escherichia coli str. K-12 substr. W3110  | protein homolog model | antibiotic resistance gene cluster, cassette, or operon, efflux pump conferring antibiotic resistance | 1159 | 379 | 32.7 |
| YojI                                                                                             | 1 | 92.9 | Escherichia coli str. K-12 substr. MG1655 | protein homolog model | efflux pump conferring antibiotic resistance                                                          | 1644 | 168 | 10.2 |
| AAC(6')-Ie-APH(2'')-Ia                                                                           | 1 | 95.8 | Staphylococcus aureus                     | protein homolog model | aminoglycoside resistance gene, antibiotic inactivation enzyme                                        | 1441 | 261 | 18.1 |
| PmrB                                                                                             | 1 | 91.2 | Escherichia coli str. K-12 substr. W3110  | protein homolog model | gene altering cell wall charge conferring antibiotic resistance, polymyxin resistance gene            | 1093 | 300 | 27.4 |
| Clostridium difficile EF-Tu mutants conferring resistance to elfamycin                           | 1 | 73.7 | Clostridium difficile                     | protein variant model | elfamycin resistance gene, antibiotic resistant gene variant or mutant                                | 1194 | 862 | 72.2 |
| Enterococcus faecium EF-Tu mutants conferring resistance to GE2270A                              | 1 | 71.8 | Enterococcus faecium DO                   | protein variant model | elfamycin resistance gene, antibiotic resistant gene variant or mutant                                | 1272 | 925 | 72.7 |
| Mycobacterium smegmatis 16S rRNA mutation in the rrsB gene conferring resistance to hygromycin B | 1 | 96.1 | Mycobacterium smegmatis str. MC2 155      | rRNA mutation model   | aminoglycoside resistance gene, antibiotic resistant gene variant or mutant                           | 1528 | 58  | 3.8  |
| Mycobacterium abscessus 16S rRNA mutation conferring resistance to neomycin                      | 1 | 74.5 | Mycobacterium abscessus                   | rRNA mutation model   | aminoglycoside resistance gene, antibiotic resistant gene variant or mutant                           | 1504 | 486 | 32.3 |
| Escherichia coli 16S rRNA mutation in the rrnB gene conferring resistance to streptomycin        | 1 | 90.3 | Escherichia coli K-12                     | rRNA mutation model   | aminoglycoside resistance gene, antibiotic resistant gene variant or mutant                           | 1542 | 133 | 8.6  |
| Escherichia coli 16S rRNA mutation in the rrsB gene conferring resistance to gentamicin C        | 1 | 76   | Escherichia coli K-12                     | rRNA mutation model   | aminoglycoside resistance gene, antibiotic resistant gene variant or mutant                           | 1542 | 324 | 21.0 |
| Mycobacterium chelonae 16S rRNA mutation conferring resistance to kanamycin A                    | 1 | 78.8 | Mycobacterium                             | rRNA mutation model   | aminoglycoside resistance gene, antibiotic resistant gene variant or mutant                           | 1441 | 548 | 38.0 |
| Mycobacterium abscessus 16S rRNA mutation conferring resistance to kanamycin                     | 1 | 79.5 | Mycobacterium abscessus                   | rRNA mutation model   | aminoglycoside resistance gene, antibiotic resistant gene variant or mutant                           | 1504 | 424 | 28.2 |



Stool1\_R2

| Gene                                                                                                              | Alignments | Average Accuracy (%) | Taxon                                | CARD Model            | CARD category                                                               | Gene length (base pairs) | Covered length | Gene coverage (100%) |
|-------------------------------------------------------------------------------------------------------------------|------------|----------------------|--------------------------------------|-----------------------|-----------------------------------------------------------------------------|--------------------------|----------------|----------------------|
| Salmonella enterica serovar Typhimurium 16S rRNA mutation in the rrsD gene conferring resistance to spectinomycin | 19         | 80.4                 | Salmonella enterica subsp. salamae   | rRNA mutation model   | aminoglycoside resistance gene, antibiotic resistant gene variant or mutant | 1544                     | 1421           | 92.0                 |
| Propionibacterium acnes 16S rRNA mutation conferring resistance to tetracycline                                   | 18         | 80.8                 | Propionibacterium acnes              | rRNA mutation model   | tetracycline resistance gene, antibiotic resistant gene variant or mutant   | 1486                     | 1415           | 95.2                 |
| tetQ                                                                                                              | 17         | 89.4                 | Bacteroides fragilis                 | protein homolog model | tetracycline resistance gene, antibiotic target protection protein          | 1974                     | 1915           | 97.0                 |
| Helicobacter pylori 16S rRNA mutation conferring resistance to tetracycline                                       | 17         | 82.9                 | Helicobacter pylori 26695            | rRNA mutation model   | tetracycline resistance gene, antibiotic resistant gene variant or mutant   | 1501                     | 935            | 62.3                 |
| Neisseria meningitidis 16S rRNA mutation conferring resistance to spectinomycin                                   | 14         | 81.5                 | Neisseria meningitidis               | rRNA mutation model   | aminoglycoside resistance gene, antibiotic resistant gene variant or mutant | 1544                     | 1544           | 100.0                |
| tetM                                                                                                              | 12         | 88.4                 | Clostridium difficile 630            | protein homolog model | tetracycline resistance gene, antibiotic target protection protein          | 1921                     | 1841           | 95.8                 |
| tetO                                                                                                              | 11         | 93.6                 | Campylobacter jejuni                 | protein homolog model | tetracycline resistance gene, antibiotic target protection protein          | 1920                     | 1920           | 100.0                |
| Neisseria gonorrhoeae 16S rRNA mutation conferring resistance to spectinomycin                                    | 11         | 79.3                 | Neisseria gonorrhoeae                | rRNA mutation model   | aminoglycoside resistance gene, antibiotic resistant gene variant or mutant | 1545                     | 1307           | 84.6                 |
| Mycobacterium tuberculosis 16S rRNA mutation conferring resistance to streptomycin                                | 10         | 82.1                 | Mycobacterium tuberculosis H37Rv     | rRNA mutation model   | aminoglycoside resistance gene, antibiotic resistant gene variant or mutant | 1537                     | 1231           | 80.1                 |
| Mycobacterium smegmatis 16S rRNA mutation in the rrsB gene conferring resistance to neomycin                      | 10         | 84.1                 | Mycobacterium smegmatis str. MC2 155 | rRNA mutation model   | aminoglycoside resistance gene, antibiotic resistant gene variant or mutant | 1528                     | 1324           | 86.6                 |
| Mycobacterium smegmatis 16S rRNA mutation in the rrsA gene conferring resistance to neomycin                      | 9          | 82.7                 | Mycobacterium smegmatis str. MC2 155 | rRNA mutation model   | aminoglycoside resistance gene, antibiotic resistant gene variant or mutant | 1528                     | 1338           | 87.6                 |
| tet32                                                                                                             | 8          | 93.5                 | Clostridiaceae bacterium K10         | protein homolog model | tetracycline resistance gene, antibiotic target protection protein          | 1920                     | 1407           | 73.3                 |

|                                                                                                 |   |      |                                      |                       |                                                                                 |      |      |      |
|-------------------------------------------------------------------------------------------------|---|------|--------------------------------------|-----------------------|---------------------------------------------------------------------------------|------|------|------|
| Escherichia coli 16S rRNA mutation in the rrsH gene conferring resistance to spectinomycin      | 8 | 79.7 | Escherichia coli K-12                | rRNA mutation model   | aminoglycoside resistance gene, antibiotic resistant gene variant or mutant     | 1542 | 1441 | 93.5 |
| Mycobacterium smegmatis 16S rRNA mutation in the rrsB gene conferring resistance to viomycin    | 8 | 84.2 | Mycobacterium smegmatis str. MC2 155 | rRNA mutation model   | antibiotic resistant gene variant or mutant, peptide antibiotic resistance gene | 1528 | 1097 | 71.8 |
| Bifidobacteria intrinsic ileS conferring resistance to mupirocin                                | 7 | 85.1 | Bifidobacterium bifidum PRL2010      | protein homolog model | mupirocin resistance gene                                                       | 3324 | 1963 | 59.1 |
| Mycobacterium smegmatis 16S rRNA mutation in the rrsA gene conferring resistance to kanamycin A | 7 | 86.2 | Mycobacterium smegmatis str. MC2 155 | rRNA mutation model   | aminoglycoside resistance gene, antibiotic resistant gene variant or mutant     | 1528 | 1374 | 89.9 |
| Escherichia coli 16S rRNA mutation in the rrsB gene conferring resistance to neomycin           | 6 | 78.2 | Escherichia coli K-12                | rRNA mutation model   | aminoglycoside resistance gene, antibiotic resistant gene variant or mutant     | 1542 | 1490 | 96.6 |
| Mycobacterium tuberculosis 16S rRNA mutation conferring resistance to viomycin                  | 6 | 79.7 | Mycobacterium tuberculosis H37Rv     | rRNA mutation model   | antibiotic resistant gene variant or mutant, peptide antibiotic resistance gene | 1537 | 894  | 58.2 |
| Mycobacterium abscessus 16S rRNA mutation conferring resistance to kanamycin                    | 6 | 80.8 | Mycobacterium abscessus              | rRNA mutation model   | aminoglycoside resistance gene, antibiotic resistant gene variant or mutant     | 1504 | 1061 | 70.5 |
| Mycobacterium smegmatis 16S rRNA mutation in the rrsB gene conferring resistance to kanamycin A | 6 | 81.5 | Mycobacterium smegmatis str. MC2 155 | rRNA mutation model   | aminoglycoside resistance gene, antibiotic resistant gene variant or mutant     | 1528 | 1324 | 86.6 |
| Escherichia coli 16S rRNA mutation in the rrnB gene conferring resistance to streptomycin       | 5 | 82.7 | Escherichia coli K-12                | rRNA mutation model   | aminoglycoside resistance gene, antibiotic resistant gene variant or mutant     | 1542 | 645  | 41.8 |
| Mycobacterium tuberculosis 16S rRNA mutation conferring resistance to amikacin                  | 5 | 81.9 | Mycobacterium tuberculosis H37Rv     | rRNA mutation model   | aminoglycoside resistance gene, antibiotic resistant gene variant or mutant     | 1537 | 1040 | 67.7 |
| Mycobacterium tuberculosis 16S rRNA mutation conferring resistance to kanamycin                 | 5 | 83   | Mycobacterium tuberculosis H37Rv     | rRNA mutation model   | aminoglycoside resistance gene, antibiotic resistant gene variant or mutant     | 1537 | 611  | 39.8 |
| tetW                                                                                            | 4 | 95   | Bifidobacterium longum               | protein homolog model | tetracycline resistance gene, antibiotic target protection protein              | 1920 | 1140 | 59.4 |

|                                                                                                  |   |      |                                      |                       |                                                                             |      |      |      |
|--------------------------------------------------------------------------------------------------|---|------|--------------------------------------|-----------------------|-----------------------------------------------------------------------------|------|------|------|
| Mycobacterium tuberculosis rpoB mutants conferring resistance to rifampicin                      | 4 | 77.1 | Mycobacterium tuberculosis H37Rv     | protein variant model | antibiotic resistant gene variant or mutant, rifampin resistance gene       | 3520 | 1765 | 50.1 |
| Escherichia coli 16S rRNA mutation in the rrsB gene conferring resistance to kanamycin A         | 4 | 78.1 | Escherichia coli K-12                | rRNA mutation model   | aminoglycoside resistance gene, antibiotic resistant gene variant or mutant | 1542 | 1163 | 75.4 |
| Escherichia coli 16S rRNA mutation in the rrsB gene conferring resistance to streptomycin        | 4 | 77.6 | Escherichia coli K-12                | rRNA mutation model   | aminoglycoside resistance gene, antibiotic resistant gene variant or mutant | 1542 | 540  | 35.0 |
| Chlamydomophila psittaci 16S rRNA mutation conferring resistance to spectinomycin                | 4 | 77.2 | Chlamydia psittaci 6BC               | rRNA mutation model   | aminoglycoside resistance gene, antibiotic resistant gene variant or mutant | 1507 | 993  | 65.9 |
| Escherichia coli 16S rRNA mutation in the rrsC gene conferring resistance to kasugamicin         | 4 | 78.1 | Escherichia coli K-12                | rRNA mutation model   | aminoglycoside resistance gene, antibiotic resistant gene variant or mutant | 1542 | 1304 | 84.6 |
| Escherichia coli 16S rRNA mutation in the rrnB gene conferring resistance to tetracycline        | 4 | 82.8 | Escherichia coli K-12                | rRNA mutation model   | tetracycline resistance gene, antibiotic resistant gene variant or mutant   | 1542 | 663  | 43.0 |
| Mycobacterium abscessus 16S rRNA mutation conferring resistance to gentamicin                    | 4 | 83.7 | Mycobacterium abscessus              | rRNA mutation model   | aminoglycoside resistance gene, antibiotic resistant gene variant or mutant | 1504 | 941  | 62.6 |
| ANT(6)-Ib                                                                                        | 3 | 90.6 | Campylobacter jejuni                 | protein homolog model | aminoglycoside resistance gene, antibiotic inactivation enzyme              | 867  | 741  | 85.5 |
| dfrF                                                                                             | 3 | 95.2 | Enterococcus faecalis                | protein homolog model | trimethoprim resistance gene, antibiotic target replacement protein         | 496  | 293  | 59.1 |
| Mycobacterium chelonae 16S rRNA mutation conferring resistance to neomycin                       | 3 | 85.6 | Mycobacterium                        | rRNA mutation model   | aminoglycoside resistance gene, antibiotic resistant gene variant or mutant | 1441 | 483  | 33.5 |
| Mycobacterium smegmatis 16S rRNA mutation in the rrsB gene conferring resistance to hygromycin B | 3 | 82   | Mycobacterium smegmatis str. MC2 155 | rRNA mutation model   | aminoglycoside resistance gene, antibiotic resistant gene variant or mutant | 1528 | 1224 | 80.1 |
| Escherichia coli 16S rRNA mutation in the rrsB gene conferring resistance to G418                | 3 | 77.4 | Escherichia coli K-12                | rRNA mutation model   | aminoglycoside resistance gene, antibiotic resistant gene variant or mutant | 1542 | 837  | 54.3 |
| Escherichia coli 16S rRNA mutation in the rrnB gene                                              | 3 | 78.4 | Escherichia coli K-12                | rRNA mutation model   | aminoglycoside resistance gene, antibiotic resistant gene variant or mutant | 1542 | 709  | 46.0 |

|                                                                                                  |   |      |                                      |                       |                                                                                                            |      |      |      |
|--------------------------------------------------------------------------------------------------|---|------|--------------------------------------|-----------------------|------------------------------------------------------------------------------------------------------------|------|------|------|
| conferring resistance to spectinomycin                                                           |   |      |                                      |                       |                                                                                                            |      |      |      |
| Pasteurella multocida 16S rRNA mutation conferring resistance to spectinomycin                   | 3 | 82   | Pasteurella multocida 36950          | rRNA mutation model   | aminoglycoside resistance gene, antibiotic resistant gene variant or mutant                                | 1551 | 520  | 33.5 |
| Mycobacterium smegmatis 16S rRNA mutation in the rrsA gene conferring resistance to hygromycin B | 3 | 82.1 | Mycobacterium smegmatis str. MC2 155 | rRNA mutation model   | aminoglycoside resistance gene, antibiotic resistant gene variant or mutant                                | 1528 | 508  | 33.2 |
| Borrelia burgdorferi 16S rRNA mutation conferring resistance to gentamicin                       | 3 | 79.4 | Borrelia burgdorferi                 | rRNA mutation model   | aminoglycoside resistance gene, antibiotic resistant gene variant or mutant                                | 1477 | 377  | 25.5 |
| mefA                                                                                             | 2 | 91.3 | Exiguobacterium sp. S3-2             | protein homolog model | efflux pump conferring antibiotic resistance                                                               | 1219 | 430  | 35.3 |
| Enterococcus faecium EF-Tu mutants conferring resistance to GE2270A                              | 2 | 79.3 | Enterococcus faecium DO              | protein variant model | elfamycin resistance gene, antibiotic resistant gene variant or mutant                                     | 1272 | 1004 | 78.9 |
| Borrelia burgdorferi 16S rRNA mutation conferring resistance to kanamycin                        | 2 | 84.3 | Borrelia burgdorferi                 | rRNA mutation model   | aminoglycoside resistance gene, antibiotic resistant gene variant or mutant                                | 1477 | 215  | 14.6 |
| Mycobacterium smegmatis 16S rRNA mutation in the rrsB gene conferring resistance to streptomycin | 2 | 90.3 | Mycobacterium smegmatis str. MC2 155 | rRNA mutation model   | aminoglycoside resistance gene, antibiotic resistant gene variant or mutant                                | 1528 | 285  | 18.7 |
| Mycobacterium chelonae 16S rRNA mutation conferring resistance to gentamicin C                   | 2 | 84.4 | Mycobacterium                        | rRNA mutation model   | aminoglycoside resistance gene, antibiotic resistant gene variant or mutant                                | 1441 | 611  | 42.4 |
| Mycobacterium smegmatis 16S rRNA mutation in the rrsA gene conferring resistance to viomycin     | 2 | 90.7 | Mycobacterium smegmatis str. MC2 155 | rRNA mutation model   | antibiotic resistant gene variant or mutant, peptide antibiotic resistance gene                            | 1528 | 213  | 13.9 |
| Escherichia coli 16S rRNA mutation conferring resistance to edeine                               | 2 | 88.4 | Escherichia coli K-12                | rRNA mutation model   | polyamine resistance gene, antibiotic resistant gene variant or mutant, peptide antibiotic resistance gene | 1542 | 353  | 22.9 |
| Mycobacterium abscessus 16S rRNA mutation conferring resistance to amikacin                      | 2 | 84.4 | Mycobacterium abscessus              | rRNA mutation model   | aminoglycoside resistance gene, antibiotic resistant gene variant or mutant                                | 1504 | 758  | 50.4 |
| Escherichia coli 16S rRNA mutation in the rrsB gene conferring resistance to tobramycin          | 2 | 76.6 | Escherichia coli K-12                | rRNA mutation model   | aminoglycoside resistance gene, antibiotic resistant gene variant or mutant                                | 1542 | 641  | 41.6 |

|                                                                                 |   |      |                                                   |                          |                                                                                                                                    |      |     |      |
|---------------------------------------------------------------------------------|---|------|---------------------------------------------------|--------------------------|------------------------------------------------------------------------------------------------------------------------------------|------|-----|------|
| Streptomyces cinnamoneus<br>EF-Tu mutants conferring<br>resistance to elfamycin | 1 | 72.8 | Streptomyces<br>cinnamoneus                       | protein homolog<br>model | elfamycin resistance gene, antibiotic<br>resistant gene variant or mutant, gene<br>involved in self resistance to antibiotic       | 1194 | 766 | 64.2 |
| emrK                                                                            | 1 | 95.3 | Escherichia coli                                  | protein homolog<br>model | efflux pump conferring antibiotic resistance                                                                                       | 1057 | 173 | 16.4 |
| tet40                                                                           | 1 | 94.3 | Streptococcus suis                                | protein homolog<br>model | efflux pump conferring antibiotic resistance                                                                                       | 1222 | 141 | 11.5 |
| ErmB                                                                            | 1 | 93.1 | Plasmid pAM77                                     | protein homolog<br>model | antibiotic target modifying enzyme,<br>macrolide resistance gene, streptogramin<br>resistance gene, lincosamide resistance<br>gene | 739  | 88  | 11.9 |
| ErmB                                                                            | 1 | 88.8 | Streptococcus<br>pyogenes                         | protein homolog<br>model | antibiotic target modifying enzyme,<br>macrolide resistance gene, streptogramin<br>resistance gene, lincosamide resistance<br>gene | 739  | 289 | 39.1 |
| ErmF                                                                            | 1 | 91.6 | Bacteroides fragilis                              | protein homolog<br>model | antibiotic target modifying enzyme,<br>macrolide resistance gene, streptogramin<br>resistance gene, lincosamide resistance<br>gene | 801  | 354 | 44.2 |
| mfd                                                                             | 1 | 93.8 | Escherichia coli str.<br>K-12 substr.<br>MG1655   | protein homolog<br>model | antibiotic resistance gene cluster,<br>cassette, or operon, efflux pump<br>conferring antibiotic resistance                        | 3115 | 943 | 30.3 |
| CfxA3                                                                           | 1 | 97.6 | Capnocytophaga<br>ochracea                        | protein homolog<br>model | beta-lactam resistance gene, antibiotic<br>inactivation enzyme                                                                     | 967  | 336 | 34.7 |
| mdtF                                                                            | 1 | 93.6 | Escherichia coli str.<br>K-12 substr.<br>MG1655   | protein homolog<br>model | fluoroquinolone resistance gene, antibiotic<br>target protection protein                                                           | 3447 | 603 | 17.5 |
| APH(6)-Id                                                                       | 1 | 91.2 | Pseudomonas<br>aeruginosa                         | protein homolog<br>model | aminoglycoside resistance gene, antibiotic<br>inactivation enzyme                                                                  | 838  | 271 | 32.3 |
| CfxA                                                                            | 1 | 96.4 | Bacteroides vulgatus                              | protein homolog<br>model | beta-lactam resistance gene, antibiotic<br>inactivation enzyme                                                                     | 967  | 304 | 31.4 |
| YojI                                                                            | 1 | 95.7 | Escherichia coli str.<br>K-12 substr.<br>MG1655   | protein homolog<br>model | efflux pump conferring antibiotic resistance                                                                                       | 1644 | 141 | 8.6  |
| Clostridium difficile EF-Tu<br>mutants conferring resistance<br>to elfamycin    | 1 | 73.1 | Clostridium difficile                             | protein variant<br>model | elfamycin resistance gene, antibiotic<br>resistant gene variant or mutant                                                          | 1194 | 921 | 77.1 |
| Staphylococcus aureus rpoC<br>conferring resistance to<br>daptomycin            | 1 | 79.1 | Staphylococcus<br>aureus subsp.<br>aureus MRSA252 | protein variant<br>model | lipopeptide antibiotic resistance gene,<br>antibiotic resistant gene variant or mutant                                             | 3625 | 387 | 10.7 |

|                                                                                            |   |      |                                          |                       |                                                                                                                      |      |     |      |
|--------------------------------------------------------------------------------------------|---|------|------------------------------------------|-----------------------|----------------------------------------------------------------------------------------------------------------------|------|-----|------|
| Escherichia coli mutant murA conferring resistance to fosfomycin                           | 1 | 95.7 | Escherichia coli ATCC 25922              | protein variant model | fosfomycin resistance gene, antibiotic resistant gene variant or mutant                                              | 1260 | 374 | 29.7 |
| Escherichia coli ompF mutants                                                              | 1 | 97.9 | Escherichia coli str. K-12 substr. W3110 | protein variant model | gene modulating permeability to antibiotic, beta-lactam resistance gene, antibiotic resistant gene variant or mutant | 1090 | 246 | 22.6 |
| Mycobacterium abscessus 16S rRNA mutation conferring resistance to neomycin                | 1 | 74.6 | Mycobacterium abscessus                  | rRNA mutation model   | aminoglycoside resistance gene, antibiotic resistant gene variant or mutant                                          | 1504 | 687 | 45.7 |
| Escherichia coli 16S rRNA mutation in the rrsB gene conferring resistance to tetracycline  | 1 | 86.9 | Escherichia coli K-12                    | rRNA mutation model   | tetracycline resistance gene, antibiotic resistant gene variant or mutant                                            | 1542 | 165 | 10.7 |
| Borrelia burgdorferi 16S rRNA mutation conferring resistance to spectinomycin              | 1 | 80.4 | Borrelia burgdorferi                     | rRNA mutation model   | aminoglycoside resistance gene, antibiotic resistant gene variant or mutant                                          | 1477 | 163 | 11.0 |
| Escherichia coli 16S rRNA mutation in the rrsB gene conferring resistance to gentamicin C  | 1 | 77.8 | Escherichia coli K-12                    | rRNA mutation model   | aminoglycoside resistance gene, antibiotic resistant gene variant or mutant                                          | 1542 | 528 | 34.2 |
| Escherichia coli 16S rRNA mutation in the rrsB gene conferring resistance to spectinomycin | 1 | 72   | Escherichia coli K-12                    | rRNA mutation model   | aminoglycoside resistance gene, antibiotic resistant gene variant or mutant                                          | 1542 | 496 | 32.2 |
| Mycobacterium abscessus 16S rRNA mutation conferring resistance to tobramycin              | 1 | 90.6 | Mycobacterium abscessus                  | rRNA mutation model   | aminoglycoside resistance gene, antibiotic resistant gene variant or mutant                                          | 1504 | 133 | 8.8  |
| Mycobacterium chelonae 16S rRNA mutation conferring resistance to tobramycin               | 1 | 80.6 | Mycobacterium                            | rRNA mutation model   | aminoglycoside resistance gene, antibiotic resistant gene variant or mutant                                          | 1441 | 471 | 32.7 |
| Escherichia coli 16S rRNA mutation in the rrsB gene conferring resistance to paromomycin   | 1 | 77.7 | Escherichia coli K-12                    | rRNA mutation model   | aminoglycoside resistance gene, antibiotic resistant gene variant or mutant                                          | 1542 | 514 | 33.3 |

#### Stool2\_R1

| Gene | Alignments | Average Accuracy (%) | Taxon       | CARD Model      | CARD category                                | Gene length (base pairs) | Covered length | Gene coverage (100%) |
|------|------------|----------------------|-------------|-----------------|----------------------------------------------|--------------------------|----------------|----------------------|
| tetL | 12         | 94.8                 | Geobacillus | protein homolog | efflux pump conferring antibiotic resistance | 1377                     | 1216           | 88.3                 |

|         |    |      |                                           |                       |                                                                                                                           |      |      |      |
|---------|----|------|-------------------------------------------|-----------------------|---------------------------------------------------------------------------------------------------------------------------|------|------|------|
|         |    |      | stearothermophilus                        | model                 |                                                                                                                           |      |      |      |
| tetQ    | 12 | 93.3 | Bacteroides fragilis                      | protein homolog model | tetracycline resistance gene, antibiotic target protection protein                                                        | 1974 | 1744 | 88.3 |
| tetM    | 5  | 89.6 | Clostridium difficile 630                 | protein homolog model | tetracycline resistance gene, antibiotic target protection protein                                                        | 1921 | 806  | 42.0 |
| InuC    | 4  | 89.5 | Streptococcus agalactiae                  | protein homolog model | antibiotic inactivation enzyme, lincosamide resistance gene                                                               | 495  | 367  | 74.1 |
| tolC    | 3  | 93.3 | Escherichia coli                          | protein homolog model | efflux pump conferring antibiotic resistance                                                                              | 1488 | 736  | 49.5 |
| ErmF    | 2  | 90.4 | Bacteroides fragilis                      | protein homolog model | antibiotic target modifying enzyme, macrolide resistance gene, streptogramin resistance gene, lincosamide resistance gene | 801  | 331  | 41.3 |
| cat     | 1  | 90   | Campylobacter coli                        | protein homolog model | antibiotic inactivation enzyme, chloramphenicol resistance gene                                                           | 624  | 193  | 30.9 |
| tet32   | 1  | 86.4 | Clostridiaceae bacterium K10              | protein homolog model | tetracycline resistance gene, antibiotic target protection protein                                                        | 1920 | 342  | 17.8 |
| arnA    | 1  | 97.8 | Escherichia coli str. K-12 substr. MG1655 | protein homolog model | gene altering cell wall charge conferring antibiotic resistance, polymyxin resistance gene                                | 1984 | 320  | 16.1 |
| OXA-209 | 1  | 95.9 | Riemerella anatipestifer                  | protein homolog model | beta-lactam resistance gene, antibiotic inactivation enzyme                                                               | 826  | 247  | 29.9 |
| mdtD    | 1  | 94.9 | Escherichia coli str. K-12 substr. MG1655 | protein homolog model | efflux pump conferring antibiotic resistance                                                                              | 1417 | 179  | 12.6 |
| leuO    | 1  | 96   | Escherichia coli str. K-12 substr. MG1655 | protein homolog model | sulfonamide resistance gene, gene modulating antibiotic efflux                                                            | 945  | 158  | 16.7 |
| tetW    | 1  | 86.8 | Bifidobacterium longum                    | protein homolog model | tetracycline resistance gene, antibiotic target protection protein                                                        | 1920 | 232  | 12.1 |
| ErmG    | 1  | 100  | Bacteroides thetaiotaomicron              | protein homolog model | antibiotic target modifying enzyme, macrolide resistance gene, streptogramin resistance gene, lincosamide resistance gene | 736  | 131  | 17.8 |
| CfxA3   | 1  | 90.5 | Capnocytophaga ochracea                   | protein homolog model | beta-lactam resistance gene, antibiotic inactivation enzyme                                                               | 967  | 277  | 28.6 |
| baeR    | 1  | 93.5 | Escherichia coli str. K-12 substr. W3110  | protein homolog model | gene modulating antibiotic efflux, efflux pump conferring antibiotic resistance                                           | 724  | 174  | 24.0 |
| YojI    | 1  | 95.8 | Escherichia coli str.                     | protein homolog       | efflux pump conferring antibiotic resistance                                                                              | 1644 | 151  | 9.2  |

|                                                                                                |   |      |                                                 |                            |                                                                                    |      |     |      |
|------------------------------------------------------------------------------------------------|---|------|-------------------------------------------------|----------------------------|------------------------------------------------------------------------------------|------|-----|------|
|                                                                                                |   |      | K-12 substr.<br>MG1655                          | model                      |                                                                                    |      |     |      |
| gadX                                                                                           | 1 | 97.9 | Escherichia coli str.<br>K-12 substr. W3110     | protein homolog<br>model   | gene modulating antibiotic efflux, efflux<br>pump conferring antibiotic resistance | 826  | 95  | 11.5 |
| adiY                                                                                           | 1 | 96   | Escherichia coli str.<br>K-12 substr.<br>MG1655 | protein homolog<br>model   | efflux pump conferring antibiotic resistance                                       | 762  | 280 | 36.7 |
| CfxA4                                                                                          | 1 | 91.9 | Bacteroides fragilis                            | protein homolog<br>model   | beta-lactam resistance gene, antibiotic<br>inactivation enzyme                     | 967  | 117 | 12.1 |
| Escherichia coli mutant UhpT<br>conferring resistance to<br>fosfomycin                         | 1 | 94.8 | Escherichia coli str.<br>K-12 substr.<br>MC4100 | protein variant<br>model   | fosfomycin resistance gene, antibiotic<br>resistant gene variant or mutant         | 1392 | 168 | 12.1 |
| Escherichia coli EF-Tu mutants<br>conferring resistance to<br>kirromycin                       | 1 | 100  | Escherichia coli                                | protein variant<br>model   | elfamycin resistance gene, antibiotic<br>resistant gene variant or mutant          | 1185 | 109 | 9.2  |
| Shigella flexneri gyrA<br>conferring resistance to<br>fluoroquinolones                         | 1 | 97.7 | Shigella flexneri 2a<br>str. 301                | protein variant<br>model   | fluoroquinolone resistance gene, antibiotic<br>resistant gene variant or mutant    | 2628 | 91  | 3.5  |
| Escherichia coli parE<br>conferring resistance to<br>fluoroquinolones                          | 1 | 91.7 | Escherichia coli str.<br>K-12 substr. W3110     | protein variant<br>model   | fluoroquinolone resistance gene, antibiotic<br>resistant gene variant or mutant    | 1894 | 218 | 11.5 |
| Enterococcus faecium EF-Tu<br>mutants conferring resistance<br>to GE2270A                      | 1 | 78.9 | Enterococcus<br>faecium DO                      | protein variant<br>model   | elfamycin resistance gene, antibiotic<br>resistant gene variant or mutant          | 1272 | 227 | 17.8 |
| Escherichia coli rpoB mutants<br>conferring resistance to<br>rifampicin                        | 1 | 95.9 | Escherichia coli<br>O157:H7 str. Sakai          | protein variant<br>model   | antibiotic resistant gene variant or mutant,<br>rifampin resistance gene           | 4030 | 190 | 4.7  |
| fosfomycin sensitive pyruvyl<br>transferase (murA)                                             | 1 | 93.3 | Escherichia coli<br>O157:H7 str. Sakai          | protein wild type<br>model | NA                                                                                 | 1282 | 98  | 7.6  |
| Escherichia coli 16S rRNA<br>mutation in the rrsB gene<br>conferring resistance to<br>neomycin | 1 | 80.2 | Escherichia coli<br>K-12                        | rRNA mutation<br>model     | aminoglycoside resistance gene, antibiotic<br>resistant gene variant or mutant     | 1542 | 163 | 10.6 |
| Escherichia coli 16S rRNA<br>mutation in the rrsB gene<br>conferring resistance to G418        | 1 | 96.9 | Escherichia coli<br>K-12                        | rRNA mutation<br>model     | aminoglycoside resistance gene, antibiotic<br>resistant gene variant or mutant     | 1542 | 72  | 4.7  |
| Mycobacterium tuberculosis<br>16S rRNA mutation conferring<br>resistance to amikacin           | 1 | 82.7 | Mycobacterium<br>tuberculosis H37Rv             | rRNA mutation<br>model     | aminoglycoside resistance gene, antibiotic<br>resistant gene variant or mutant     | 1537 | 199 | 12.9 |
| Neisseria gonorrhoeae 16S                                                                      | 1 | 78.9 | Neisseria                                       | rRNA mutation              | aminoglycoside resistance gene, antibiotic                                         | 1545 | 237 | 15.3 |



|                                                                                                 |   |      |                                      |                     |                                                                                 |      |     |      |
|-------------------------------------------------------------------------------------------------|---|------|--------------------------------------|---------------------|---------------------------------------------------------------------------------|------|-----|------|
| rRNA mutation conferring resistance to spectinomycin                                            |   |      | gonorrhoeae                          | model               | resistant gene variant or mutant                                                |      |     |      |
| Escherichia coli 16S rRNA mutation in the rrsB gene conferring resistance to gentamicin C       | 1 | 84.2 | Escherichia coli K-12                | rRNA mutation model | aminoglycoside resistance gene, antibiotic resistant gene variant or mutant     | 1542 | 254 | 16.5 |
| Mycobacterium smegmatis 16S rRNA mutation in the rrsA gene conferring resistance to kanamycin A | 1 | 97   | Mycobacterium smegmatis str. MC2 155 | rRNA mutation model | aminoglycoside resistance gene, antibiotic resistant gene variant or mutant     | 1528 | 72  | 4.7  |
| Mycobacterium chelonae 16S rRNA mutation conferring resistance to gentamicin C                  | 1 | 79.8 | Mycobacterium                        | rRNA mutation model | aminoglycoside resistance gene, antibiotic resistant gene variant or mutant     | 1441 | 364 | 25.3 |
| Mycobacterium smegmatis 16S rRNA mutation in the rrsB gene conferring resistance to viomycin    | 1 | 100  | Mycobacterium smegmatis str. MC2 155 | rRNA mutation model | antibiotic resistant gene variant or mutant, peptide antibiotic resistance gene | 1528 | 54  | 3.5  |
| Mycobacterium abscessus 16S rRNA mutation conferring resistance to gentamicin                   | 1 | 95.4 | Mycobacterium abscessus              | rRNA mutation model | aminoglycoside resistance gene, antibiotic resistant gene variant or mutant     | 1504 | 88  | 5.9  |
| Neisseria meningitidis 16S rRNA mutation conferring resistance to spectinomycin                 | 1 | 88.4 | Neisseria meningitidis               | rRNA mutation model | aminoglycoside resistance gene, antibiotic resistant gene variant or mutant     | 1544 | 173 | 11.2 |
| Mycobacterium smegmatis 16S rRNA mutation in the rrsA gene conferring resistance to viomycin    | 1 | 86.4 | Mycobacterium smegmatis str. MC2 155 | rRNA mutation model | antibiotic resistant gene variant or mutant, peptide antibiotic resistance gene | 1528 | 252 | 16.5 |

#### Stool2\_R2

| Gene                                                             | Alignments | Average Accuracy (%) | Taxon                           | CARD Model            | CARD category                                                      | Gene length (base pairs) | Covered length | Gene coverage (100%) |
|------------------------------------------------------------------|------------|----------------------|---------------------------------|-----------------------|--------------------------------------------------------------------|--------------------------|----------------|----------------------|
| tetQ                                                             | 9          | 90.8                 | Bacteroides fragilis            | protein homolog model | tetracycline resistance gene, antibiotic target protection protein | 1974                     | 1684           | 85.3                 |
| Bifidobacteria intrinsic ileS conferring resistance to mupirocin | 4          | 79.3                 | Bifidobacterium bifidum PRL2010 | protein homolog model | mupirocin resistance gene                                          | 3324                     | 1936           | 58.2                 |
| tetW                                                             | 4          | 87                   | Bifidobacterium longum          | protein homolog model | tetracycline resistance gene, antibiotic target protection protein | 1920                     | 768            | 40.0                 |

|                                                                                            |   |      |                                           |                       |                                                                                                                                          |      |      |       |
|--------------------------------------------------------------------------------------------|---|------|-------------------------------------------|-----------------------|------------------------------------------------------------------------------------------------------------------------------------------|------|------|-------|
| Propionibacterium acnes 16S rRNA mutation conferring resistance to tetracycline            | 4 | 75.5 | Propionibacterium acnes                   | rRNA mutation model   | tetracycline resistance gene, antibiotic resistant gene variant or mutant                                                                | 1486 | 857  | 57.7  |
| Mycobacterium tuberculosis 16S rRNA mutation conferring resistance to kanamycin            | 4 | 80.8 | Mycobacterium tuberculosis H37Rv          | rRNA mutation model   | aminoglycoside resistance gene, antibiotic resistant gene variant or mutant                                                              | 1537 | 1112 | 72.3  |
| Escherichia coli rpoB mutants conferring resistance to rifampicin                          | 3 | 93.9 | Escherichia coli O157:H7 str. Sakai       | protein variant model | antibiotic resistant gene variant or mutant, rifampin resistance gene                                                                    | 4030 | 201  | 5.0   |
| Escherichia coli 16S rRNA mutation in the rrsH gene conferring resistance to spectinomycin | 3 | 90.2 | Escherichia coli K-12                     | rRNA mutation model   | aminoglycoside resistance gene, antibiotic resistant gene variant or mutant                                                              | 1542 | 553  | 35.9  |
| InuC                                                                                       | 2 | 94.3 | Streptococcus agalactiae                  | protein homolog model | antibiotic inactivation enzyme, lincosamide resistance gene                                                                              | 495  | 373  | 75.4  |
| gadE                                                                                       | 2 | 96.6 | Escherichia coli str. K-12 substr. MG1655 | protein homolog model | gene modulating antibiotic efflux, antibiotic resistance gene cluster, cassette, or operon, efflux pump conferring antibiotic resistance | 528  | 388  | 73.5  |
| mdtO                                                                                       | 2 | 91.2 | Escherichia coli str. K-12 substr. W3110  | protein homolog model | efflux pump conferring antibiotic resistance                                                                                             | 2052 | 350  | 17.1  |
| tetM                                                                                       | 2 | 92.4 | Clostridium difficile 630                 | protein homolog model | tetracycline resistance gene, antibiotic target protection protein                                                                       | 1921 | 452  | 23.5  |
| Escherichia coli parC conferring resistance to fluoroquinolone                             | 2 | 94.5 | Escherichia coli str. K-12 substr. MG1655 | protein variant model | fluoroquinolone resistance gene, antibiotic resistant gene variant or mutant, gene involved in self resistance to antibiotic             | 2260 | 612  | 27.1  |
| Escherichia coli EF-Tu mutants conferring resistance to Pulvomycin                         | 2 | 80.6 | Escherichia coli CFT073                   | protein variant model | elfamycin resistance gene, antibiotic resistant gene variant or mutant                                                                   | 1230 | 730  | 59.3  |
| Mycobacterium tuberculosis 16S rRNA mutation conferring resistance to streptomycin         | 2 | 78.6 | Mycobacterium tuberculosis H37Rv          | rRNA mutation model   | aminoglycoside resistance gene, antibiotic resistant gene variant or mutant                                                              | 1537 | 1537 | 100.0 |
| Neisseria gonorrhoeae 16S rRNA mutation conferring resistance to spectinomycin             | 2 | 81   | Neisseria gonorrhoeae                     | rRNA mutation model   | aminoglycoside resistance gene, antibiotic resistant gene variant or mutant                                                              | 1545 | 981  | 63.5  |
| Chlamydomphila psittaci 16S rRNA mutation conferring resistance to spectinomycin           | 2 | 77.5 | Chlamydia psittaci 6BC                    | rRNA mutation model   | aminoglycoside resistance gene, antibiotic resistant gene variant or mutant                                                              | 1507 | 452  | 30.0  |
| Mycobacterium chelonae 16S rRNA mutation conferring resistance to amikacin                 | 2 | 78.1 | Mycobacterium                             | rRNA mutation model   | aminoglycoside resistance gene, antibiotic resistant gene variant or mutant                                                              | 1441 | 543  | 37.7  |

|                                                                                                 |   |      |                                           |                       |                                                                                                |      |      |       |
|-------------------------------------------------------------------------------------------------|---|------|-------------------------------------------|-----------------------|------------------------------------------------------------------------------------------------|------|------|-------|
| Mycobacterium smegmatis 16S rRNA mutation in the rrsA gene conferring resistance to kanamycin A | 2 | 80.7 | Mycobacterium smegmatis str. MC2 155      | rRNA mutation model   | aminoglycoside resistance gene, antibiotic resistant gene variant or mutant                    | 1528 | 1276 | 83.5  |
| Borrelia burgdorferi 16S rRNA mutation conferring resistance to gentamicin                      | 2 | 79.3 | Borrelia burgdorferi                      | rRNA mutation model   | aminoglycoside resistance gene, antibiotic resistant gene variant or mutant                    | 1477 | 373  | 25.3  |
| bacA                                                                                            | 1 | 88.4 | Escherichia coli str. K-12 substr. MG1655 | protein homolog model | gene conferring antibiotic resistance via molecular bypass, peptide antibiotic resistance gene | 823  | 305  | 37.1  |
| tetL                                                                                            | 1 | 97   | Geobacillus stearothermophilus            | protein homolog model | efflux pump conferring antibiotic resistance                                                   | 1377 | 139  | 10.1  |
| emrA                                                                                            | 1 | 91.5 | Escherichia coli str. K-12 substr. W3110  | protein homolog model | efflux pump conferring antibiotic resistance                                                   | 1174 | 181  | 15.4  |
| cat                                                                                             | 1 | 90.7 | Campylobacter coli                        | protein homolog model | antibiotic inactivation enzyme, chloramphenicol resistance gene                                | 624  | 240  | 38.5  |
| mdtG                                                                                            | 1 | 91.3 | Escherichia coli str. K-12 substr. W3110  | protein homolog model | efflux pump conferring antibiotic resistance                                                   | 1228 | 356  | 29.0  |
| tet32                                                                                           | 1 | 79.7 | Clostridiaceae bacterium K10              | protein homolog model | tetracycline resistance gene, antibiotic target protection protein                             | 1920 | 386  | 20.1  |
| msbA                                                                                            | 1 | 94.4 | Escherichia coli str. K-12 substr. MG1655 | protein homolog model | efflux pump conferring antibiotic resistance                                                   | 1749 | 212  | 12.1  |
| arnA                                                                                            | 1 | 82.8 | Escherichia coli str. K-12 substr. MG1655 | protein homolog model | gene altering cell wall charge conferring antibiotic resistance, polymyxin resistance gene     | 1984 | 552  | 27.8  |
| fyuA                                                                                            | 1 | 98.5 | Escherichia coli                          | protein homolog model | aminoglycoside resistance gene, tetracycline resistance gene                                   | 2022 | 137  | 6.8   |
| CfxA2                                                                                           | 1 | 90.1 | Prevotella intermedia                     | protein homolog model | beta-lactam resistance gene, antibiotic inactivation enzyme                                    | 967  | 113  | 11.7  |
| tet40                                                                                           | 1 | 93.2 | Streptococcus suis                        | protein homolog model | efflux pump conferring antibiotic resistance                                                   | 1222 | 774  | 63.3  |
| mdtM                                                                                            | 1 | 98   | Escherichia coli str. K-12 substr. MG1655 | protein homolog model | efflux pump conferring antibiotic resistance                                                   | 1234 | 155  | 12.6  |
| acrF                                                                                            | 1 | 94.7 | Escherichia coli str. K-12 substr. MG1655 | protein homolog model | efflux pump conferring antibiotic resistance                                                   | 3106 | 327  | 10.5  |
| mdtP                                                                                            | 1 | 95.7 | Escherichia coli str. K-12 substr. W3110  | protein homolog model | efflux pump conferring antibiotic resistance                                                   | 1467 | 1467 | 100.0 |

|                                                                  |   |      |                                           |                       |                                                                                                                              |      |     |       |
|------------------------------------------------------------------|---|------|-------------------------------------------|-----------------------|------------------------------------------------------------------------------------------------------------------------------|------|-----|-------|
| mel                                                              | 1 | 90.9 | Streptococcus pneumoniae Taiwan19F-14     | protein homolog model | efflux pump conferring antibiotic resistance                                                                                 | 1465 | 99  | 6.8   |
| TEM-4                                                            | 1 | 90.9 | Klebsiella pneumoniae                     | protein homolog model | beta-lactam resistance gene, antibiotic inactivation enzyme                                                                  | 1061 | 516 | 48.6  |
| mdtE                                                             | 1 | 93.6 | Escherichia coli str. K-12 substr. W3110  | protein homolog model | antibiotic resistance gene cluster, cassette, or operon, efflux pump conferring antibiotic resistance                        | 1159 | 577 | 49.8  |
| tolC                                                             | 1 | 89.7 | Escherichia coli                          | protein homolog model | efflux pump conferring antibiotic resistance                                                                                 | 1488 | 605 | 40.7  |
| H-NS                                                             | 1 | 98.7 | Escherichia coli O157:H7 str. Sakai       | protein homolog model | gene modulating antibiotic efflux, efflux pump conferring antibiotic resistance                                              | 415  | 79  | 19.0  |
| mdtA                                                             | 1 | 94.3 | Escherichia coli str. K-12 substr. MG1655 | protein homolog model | efflux pump conferring antibiotic resistance                                                                                 | 1249 | 245 | 19.6  |
| mdtF                                                             | 1 | 94.6 | Escherichia coli str. K-12 substr. MG1655 | protein homolog model | antibiotic resistance gene cluster, cassette, or operon, efflux pump conferring antibiotic resistance                        | 3115 | 262 | 8.4   |
| gadW                                                             | 1 | 90.8 | Escherichia coli O25b:H4                  | protein homolog model | gene modulating antibiotic efflux, efflux pump conferring antibiotic resistance                                              | 729  | 261 | 35.8  |
| APH(6)-Id                                                        | 1 | 94.5 | Pseudomonas aeruginosa                    | protein homolog model | aminoglycoside resistance gene, antibiotic inactivation enzyme                                                               | 838  | 693 | 82.7  |
| baeR                                                             | 1 | 90.4 | Escherichia coli str. K-12 substr. W3110  | protein homolog model | gene modulating antibiotic efflux, efflux pump conferring antibiotic resistance                                              | 724  | 724 | 100.0 |
| YojI                                                             | 1 | 96   | Escherichia coli str. K-12 substr. MG1655 | protein homolog model | efflux pump conferring antibiotic resistance                                                                                 | 1644 | 279 | 17.0  |
| emrD                                                             | 1 | 90.8 | Escherichia coli B185                     | protein homolog model | efflux pump conferring antibiotic resistance                                                                                 | 1191 | 211 | 17.7  |
| kdpE                                                             | 1 | 98.2 | Escherichia coli str. K-12 substr. MG1655 | protein homolog model | aminoglycoside resistance gene                                                                                               | 678  | 221 | 32.6  |
| evgS                                                             | 1 | 91.9 | Escherichia coli str. K-12 substr. MG1655 | protein homolog model | gene modulating antibiotic efflux, efflux pump conferring antibiotic resistance                                              | 3595 | 628 | 17.5  |
| Escherichia coli soxR mutants                                    | 1 | 89.6 | Escherichia coli str. K-12 substr. MG1655 | protein variant model | gene modulating antibiotic efflux, antibiotic resistant gene variant or mutant, efflux pump conferring antibiotic resistance | 466  | 464 | 99.6  |
| Escherichia coli acrR mutants resulting in antibiotic resistance | 1 | 95   | Escherichia coli str. K-12 substr.        | protein variant model | gene modulating antibiotic efflux, antibiotic resistant gene variant or mutant, efflux                                       | 648  | 280 | 43.2  |

|                                                                                              |   |      |                                           |                         |                                                                                 |      |      |      |
|----------------------------------------------------------------------------------------------|---|------|-------------------------------------------|-------------------------|---------------------------------------------------------------------------------|------|------|------|
|                                                                                              |   |      | MG1655                                    |                         | pump conferring antibiotic resistance                                           |      |      |      |
| Escherichia coli mutant GlpT conferring resistance to fosfomycin                             | 1 | 88.1 | Escherichia coli str. K-12 substr. MC4100 | protein variant model   | fosfomycin resistance gene, antibiotic resistant gene variant or mutant         | 1359 | 417  | 30.7 |
| fosfomycin sensitive pyruvyl transferase (murA)                                              | 1 | 87.3 | Escherichia coli str. K-12 substr. W3110  | protein wild type model | NA                                                                              | 1282 | 396  | 30.9 |
| Escherichia coli 16S rRNA mutation in the rrsB gene conferring resistance to G418            | 1 | 82.6 | Escherichia coli K-12                     | rRNA mutation model     | aminoglycoside resistance gene, antibiotic resistant gene variant or mutant     | 1542 | 358  | 23.2 |
| Mycobacterium abscessus 16S rRNA mutation conferring resistance to neomycin                  | 1 | 89.2 | Mycobacterium abscessus                   | rRNA mutation model     | aminoglycoside resistance gene, antibiotic resistant gene variant or mutant     | 1504 | 150  | 10.0 |
| Escherichia coli 16S rRNA mutation in the rrnB gene conferring resistance to spectinomycin   | 1 | 77   | Escherichia coli K-12                     | rRNA mutation model     | aminoglycoside resistance gene, antibiotic resistant gene variant or mutant     | 1542 | 319  | 20.7 |
| Escherichia coli 16S rRNA mutation in the rrsB gene conferring resistance to kanamycin A     | 1 | 79.2 | Escherichia coli K-12                     | rRNA mutation model     | aminoglycoside resistance gene, antibiotic resistant gene variant or mutant     | 1542 | 330  | 21.4 |
| Mycobacterium tuberculosis 16S rRNA mutation conferring resistance to viomycin               | 1 | 72.4 | Mycobacterium tuberculosis H37Rv          | rRNA mutation model     | antibiotic resistant gene variant or mutant, peptide antibiotic resistance gene | 1537 | 1192 | 77.6 |
| Borrelia burgdorferi 16S rRNA mutation conferring resistance to spectinomycin                | 1 | 76.6 | Borrelia burgdorferi                      | rRNA mutation model     | aminoglycoside resistance gene, antibiotic resistant gene variant or mutant     | 1477 | 317  | 21.5 |
| Mycobacterium tuberculosis 16S rRNA mutation conferring resistance to amikacin               | 1 | 74.9 | Mycobacterium tuberculosis H37Rv          | rRNA mutation model     | aminoglycoside resistance gene, antibiotic resistant gene variant or mutant     | 1537 | 1434 | 93.3 |
| Escherichia coli 16S rRNA mutation in the rrsB gene conferring resistance to streptomycin    | 1 | 73.4 | Escherichia coli K-12                     | rRNA mutation model     | aminoglycoside resistance gene, antibiotic resistant gene variant or mutant     | 1542 | 496  | 32.2 |
| Mycobacterium chelonae 16S rRNA mutation conferring resistance to gentamicin C               | 1 | 78.9 | Mycobacterium                             | rRNA mutation model     | aminoglycoside resistance gene, antibiotic resistant gene variant or mutant     | 1441 | 269  | 18.7 |
| Mycobacterium smegmatis 16S rRNA mutation in the rrsB gene conferring resistance to viomycin | 1 | 82.1 | Mycobacterium smegmatis str. MC2 155      | rRNA mutation model     | antibiotic resistant gene variant or mutant, peptide antibiotic resistance gene | 1528 | 202  | 13.2 |
| Salmonella enterica serovar                                                                  | 1 | 70.6 | Salmonella enterica                       | rRNA mutation           | aminoglycoside resistance gene, antibiotic                                      | 1544 | 311  | 20.1 |

|                                                                                              |   |      |                                      |                     |                                                                                                            |      |     |      |
|----------------------------------------------------------------------------------------------|---|------|--------------------------------------|---------------------|------------------------------------------------------------------------------------------------------------|------|-----|------|
| Typhimurium 16S rRNA mutation in the rrsD gene conferring resistance to spectinomycin        |   |      | subsp. salamae                       | model               | resistant gene variant or mutant                                                                           |      |     |      |
| Mycobacterium abscessus 16S rRNA mutation conferring resistance to gentamicin                | 1 | 79.3 | Mycobacterium abscessus              | rRNA mutation model | aminoglycoside resistance gene, antibiotic resistant gene variant or mutant                                | 1504 | 439 | 29.2 |
| Neisseria meningitidis 16S rRNA mutation conferring resistance to spectinomycin              | 1 | 82.3 | Neisseria meningitidis               | rRNA mutation model | aminoglycoside resistance gene, antibiotic resistant gene variant or mutant                                | 1544 | 238 | 15.4 |
| Escherichia coli 16S rRNA mutation conferring resistance to edeine                           | 1 | 80.4 | Escherichia coli K-12                | rRNA mutation model | polyamine resistance gene, antibiotic resistant gene variant or mutant, peptide antibiotic resistance gene | 1542 | 231 | 15.0 |
| Mycobacterium abscessus 16S rRNA mutation conferring resistance to amikacin                  | 1 | 74.9 | Mycobacterium abscessus              | rRNA mutation model | aminoglycoside resistance gene, antibiotic resistant gene variant or mutant                                | 1504 | 551 | 36.6 |
| Mycobacterium chelonae 16S rRNA mutation conferring resistance to tobramycin                 | 1 | 79.5 | Mycobacterium                        | rRNA mutation model | aminoglycoside resistance gene, antibiotic resistant gene variant or mutant                                | 1441 | 323 | 22.4 |
| Mycobacterium smegmatis 16S rRNA mutation in the rrsB gene conferring resistance to neomycin | 1 | 83.4 | Mycobacterium smegmatis str. MC2 155 | rRNA mutation model | aminoglycoside resistance gene, antibiotic resistant gene variant or mutant                                | 1528 | 167 | 10.9 |

**Table S7.** Antibiotics and related resistance genes and mechanisms against them.

| Antibiotics     | Mechanisms                        | Target                      | Effective      | Resistance genes          |
|-----------------|-----------------------------------|-----------------------------|----------------|---------------------------|
| Beta-lactam     | Inhibit<br>Cell wall synthesis    | Peptidoglycan cross-linking | Gram-positive  | PBP2x, PBP1a, PBP2b, etc  |
| Fosfomycin      | Inhibit<br>Cell wall synthesis    | MurA                        | Broad-spectrum | murA, etc                 |
| Aminoglycoside  | Inhibit<br>Protein synthesis      | 30S ribosomal subunit       | Gram-negative  | 16S rRNA, etc             |
| Tetracycline    | Inhibit<br>Protein synthesis      | 30S ribosomal subunit       | Broad-spectrum | tetM, tetQ, tetW, etc     |
| Macrolide       | Inhibit<br>Protein synthesis      | 50S ribosomal subunit       | Gram-positive  | ErmF, ErmG, RlmA(II), etc |
| Streptogramin   | Inhibit<br>Protein synthesis      | 50S ribosomal subunit       | Gram-positive  | ErmF, ErmG, etc           |
| Mupirocin       | Inhibit<br>Protein synthesis      | tRNA                        | Gram-positive  | ileS                      |
| Fluoroquinolone | Inhibit<br>nucleic acid synthesis | DNA                         | Broad-spectrum | gyrA, parC                |
| Sulfonamide     | Inhibit<br>nucleic acid synthesis | Folic acid                  | Broad-spectrum | leuO, sul2                |
| Trimethoprim    | Inhibit<br>nucleic acid synthesis | Folic acid                  | Gram-positive  | dfrF                      |

**Table S8.** Statistics and host-microbe interaction type assessment of unclassified reads predicted by BERTax.

| Samples | Number of Archaea | Number of Viruses | Number of Eukaryota | Number of Bacteria | Harmful Bacteria | Number of Harmful Bacteria |
|---------|-------------------|-------------------|---------------------|--------------------|------------------|----------------------------|
| Saliva1 | 65                | 218               | 612                 | 504                | NA               | NA                         |
| Saliva2 | 1435              | 2595              | 6717                | 6354               | NA               | NA                         |
| Saliva3 | 1393              | 2952              | 5921                | 8253               | Proteobacteria   | 1120                       |
|         |                   |                   |                     |                    | Bacteroidetes    | 1633                       |
| Stool1  | 6690              | 10623             | 24300               | 49560              | Firmicutes       | 21152                      |
|         |                   |                   |                     |                    | Bacteroidetes    | 10244                      |
| Stool2  | 1873              | 3354              | 10014               | 13594              | Bacteroidetes    | 3546                       |
